# Supplementary material for: Radical relay strategy for the construction of alkylsulfonated indolo[2,1-a]isoquinoline-6(5H)-ones via SO2 insertion/Smiles rearrangement
Source: Royal Society of Chemistry journal article supplement (doi:10.1039/d4cc03924f), 2024-01-01

## Supporting Information

# Radical relay strategy for the construction of alkylsulfonated indolo[2,1-*a*]isoquinoline-6(5*H*)- ones *via* SO<sub>2</sub> insertion/Smiles rearrangement

Si-Wei Tian, Long-Jin Zhong,\* Jian-Hong Fan, Ke-Wen Tang, Yu Liu\*

Department of Chemistry and Chemical Engineering, Hunan Institute of Science and Technology,  
Yueyang 414006, China.

E-mail: zlj1511@hnu.edu.cn; lyxtmj\_613@163.com

### List of Contents

|                                                       |         |
|-------------------------------------------------------|---------|
| 1. General information                                | S1      |
| 2. Experimental section                               | S1-S14  |
| 2.1 General procedure for the synthesis of substrates | S1      |
| 2.2 Typical experimental procedure                    | S1-S2   |
| 2.3 Screening of the optimal reaction conditions      | S2      |
| 2.4 Synthetic Utilizations                            | S3-S4   |
| 2.5 Control experiments                               | S5-S16  |
| 3. Characterization data for all products             | S17-S31 |
| 4. Reference                                          | S32     |
| 5. Spectra                                            | S33-S74 |

## 1. General Information

Unless otherwise stated, all commercial reagents were used as received. Propiophenone, aldehydes (Innochem, >98%), *o*-Phenylenediamine and Phenylhydrazine hydrochloride were used without further treatment. All reagents and solvents were commercially available and used without any further purification unless specified. All solvents were dried and distilled according to standard procedures. Flash column chromatography was performed using silica gel (0.25mm, 300-400 mesh). Analytical thin-layer chromatography was performed using glass plates pre-coated with 0.25mm 300-400 mesh silica gel impregnated with a fluorescent indicator (254 nm). All reactions were carried out with magnetic stirring and in dried glassware. Nuclear magnetic resonance (NMR) spectra are recorded in parts per million from internal tetramethylsilane on the  $\delta$  scale.  $^1\text{H}$  NMR,  $^{19}\text{F}$  NMR and  $^{13}\text{C}$  NMR spectra were recorded in  $\text{CDCl}_3$  on a Bruker DRX-400 spectrometer operating at 400 MHz, 282 MHz and 100 MHz, respectively. All chemical shift values are quoted in ppm and coupling constants quoted in Hz. The solvent peak was used as a reference value, for  $^1\text{H}$  NMR: TMS = 0.00 ppm, for  $^{13}\text{C}$  NMR:  $\text{CDCl}_3$  = 77.00 ppm. The following abbreviations were used to explain multiplicities: s = singlet, d = doublet, dd = doublet of doublet, t = triplet, td = triplet of doublet, q = quartet, m = multiplet, and br = broad. High-resolution mass spectra (HRMS) were obtained on an Agilent mass spectrometer using ESI-TOF (electrospray ionization-time of flight).

## 2. Experiment Section

### 2.1 General Procedure for the Synthesis of Substrates

All *N*-(aryl)[(2-ethynyl)arylsulfonyl]acrylamide **1a**<sup>[1]</sup> and Hantzsch esters **2a**<sup>[2]</sup> were synthesized according to the known methods.

### 2.2 Typical Experimental Procedure

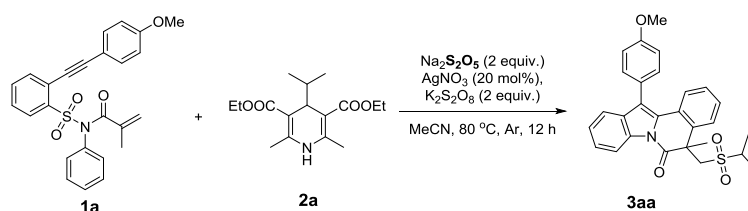

To a schlenk tube were added *N*-(aryl)[(2-ethynyl)arylsulfonyl]acrylamide **1a** (0.2 mmol, 86.2 mg), Hantzsch esters **2a** (2 equiv., 0.4 mmol, 118.0 mg), Na<sub>2</sub>S<sub>2</sub>O<sub>5</sub> (2 equiv., 0.4 mmol, 76.0 mg), AgNO<sub>3</sub> (20 mol%, 6.8 mg), K<sub>2</sub>S<sub>2</sub>O<sub>8</sub> (2 equiv, 0.4 mmol, 108.0 mg) and MeCN (2 mL). Then, the tube was stirred at 80 °C in Ar atmosphere for 12 h, until complete consumption of starting material as monitored by TLC analysis. The residue was purified by silica gel flash column chromatography (petroleum ether/ethyl acetate = 3 : 1) to afford the desired products.

### 2.3 Table S1. Screening of the Optimal Reaction Conditions<sup>a</sup>

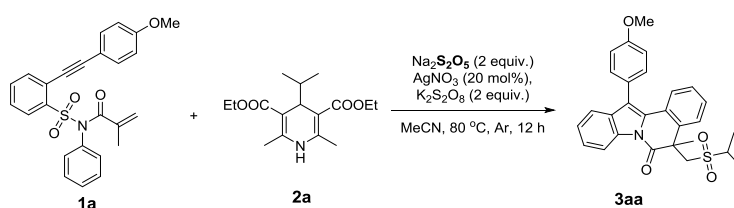

| Entry | Variation from the standard conditions                                                                  | Yield (%) |
|-------|---------------------------------------------------------------------------------------------------------|-----------|
| 1     | None                                                                                                    | 70        |
| 2     | AgOAc instead of AgNO <sub>3</sub>                                                                      | 28        |
| 3     | Ag <sub>2</sub> CO <sub>3</sub> instead of AgNO <sub>3</sub>                                            | 32        |
| 4     | AgIO <sub>3</sub> instead of AgNO <sub>3</sub>                                                          | 49        |
| 5     | Ag <sub>2</sub> SO <sub>4</sub> instead of AgNO <sub>3</sub>                                            | 47        |
| 6     | No AgNO <sub>3</sub>                                                                                    | 16        |
| 7     | (NH) <sub>2</sub> S <sub>2</sub> O <sub>8</sub> instead of K <sub>2</sub> S <sub>2</sub> O <sub>8</sub> | 50        |
| 8     | PhI(OAc) <sub>2</sub> instead of K <sub>2</sub> S <sub>2</sub> O <sub>8</sub>                           | 18        |
| 9     | TBHP instead of K <sub>2</sub> S <sub>2</sub> O <sub>8</sub>                                            | 16        |
| 10    | Oxone instead of K <sub>2</sub> S <sub>2</sub> O <sub>8</sub>                                           | 0         |
| 11    | No K <sub>2</sub> S <sub>2</sub> O <sub>8</sub>                                                         | 0         |
| 12    | Na <sub>2</sub> S <sub>2</sub> O <sub>8</sub> instead of K <sub>2</sub> S <sub>2</sub> O <sub>8</sub>   | 0         |
| 13    | DCE instead of MeCN                                                                                     | 47        |
| 14    | Toluene instead of MeCN                                                                                 | 27        |
| 15    | THF instead of MeCN                                                                                     | 43        |
| 16    | DMSO instead of MeCN                                                                                    | 36        |
| 17    | DMF instead of MeCN                                                                                     | 0         |
| 18    | Acetone instead of MeCN                                                                                 | 24        |
| 19    | 1, 4-dioxane instead of MeCN                                                                            | 26        |
| 20    | K <sub>2</sub> S <sub>2</sub> O <sub>5</sub> instead of Na <sub>2</sub> S <sub>2</sub> O <sub>5</sub>   | 41        |
| 21    | DABCO·(SO <sub>2</sub> ) <sub>2</sub> instead of Na <sub>2</sub> S <sub>2</sub> O <sub>5</sub>          | 53        |
| 22    | No Na <sub>2</sub> S <sub>2</sub> O <sub>5</sub>                                                        | 28        |
| 23    | at 60 °C                                                                                                | 27        |
| 24    | at 100 °C                                                                                               | 46        |
| 25    | at 24 h                                                                                                 | 54        |
| 26    | at 8 h                                                                                                  | 36        |

<sup>a</sup>Reaction conditions: **1a** (0.2 mmol), **2a** (0.4 mmol), Na<sub>2</sub>S<sub>2</sub>O<sub>5</sub> (2.0 equiv.), AgNO<sub>3</sub> (20 mol %), K<sub>2</sub>S<sub>2</sub>O<sub>8</sub> (2.0 equiv.), CH<sub>3</sub>CN (2 mL; 0.1 M), argon, 80 °C and 12 h.

## 2.4 Synthetic Utilizations

To a stirred solution of **4ua** (0.0938 g, 0.2 mmol) in 3 mL DMF was added  $t$ BuONa (21.1 mg, 0.22 mmol, 1.1 equiv.) at room temperature for 6 h. The crude product was further purified by silica gel flash chromatography to give **5** (74% yield) as a yellow oil.

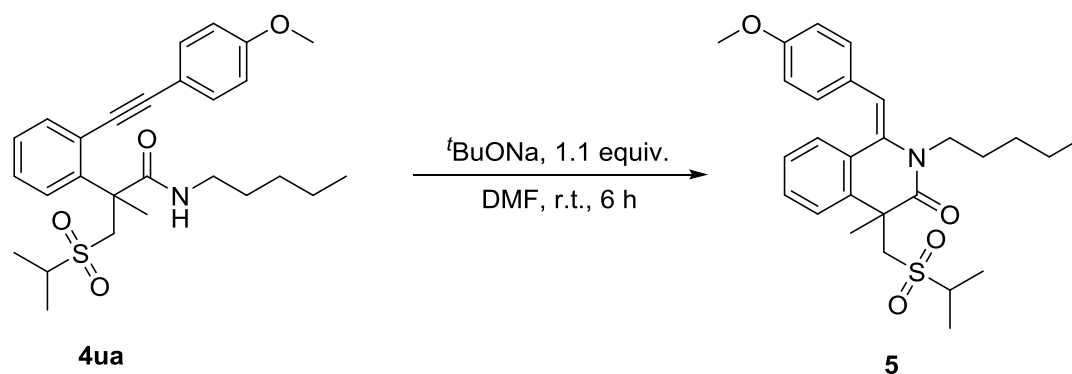

The date and NMR spectra of **5**.

**(E)-4-((isopropylsulfonyl)methyl)-1-(4-methoxybenzylidene)-4-methyl-2-pentyl-1,4-dihydroisoquinolin-3-(2H)-one (5)**: by silica gel column chromatography (hexane/ethyl acetate = 4 : 1); Yield: 69.4 mg, 74%; yellow oil;  $^1\text{H}$  NMR (400 MHz,  $\text{CDCl}_3$ )  $\delta$ : 7.63-7.60 (m, 1H), 7.57-7.54 (m, 1H), 7.40-7.35 (m, 4H), 6.92 (d,  $J = 8.8$  Hz, 2H), 6.49 (s, 1H), 3.90 (d,  $J = 14.4$  Hz, 1H), 3.83 (s, 3H), 3.57 (t,  $J = 7.2$  Hz, 2H), 3.52 (d,  $J = 14.4$  Hz, 1H), 3.04-2.97 (m, 1H), 1.77 (s, 3H), 1.38-1.32 (m, 2H), 1.28 (d,  $J = 6.8$  Hz, 3H), 1.21 (d,  $J = 7.2$  Hz, 3H), 1.12-1.03 (m, 2H), 1.00-0.92 (m, 2H), 0.70 (t,  $J = 7.2$  Hz, 3H);  $^{13}\text{C}\{^1\text{H}\}$  NMR (100 MHz,  $\text{CDCl}_3$ )  $\delta$ : 171.8, 159.0, 136.1, 135.0, 134.5, 130.0, 128.1, 127.6, 127.1, 125.0, 123.0, 116.5, 114.0, 55.2, 55.1, 55.0, 47.0, 46.3, 28.6, 27.2, 23.1, 22.0, 16.1, 13.9, 13.7; HRMS (ESI-TOF)  $m/z$ :  $\text{C}_{27}\text{H}_{36}\text{NO}_4\text{S}$  ( $\text{M} + \text{H}$ ) $^+$  calcd for 470.2360, found 470.2365.

**(E)-4-((isopropylsulfonyl)methyl)-1-(4-methoxybenzylidene)-4-methyl-2-pentyl-1,4-dihydroisoquinolin-3-(2H)-one (5)**

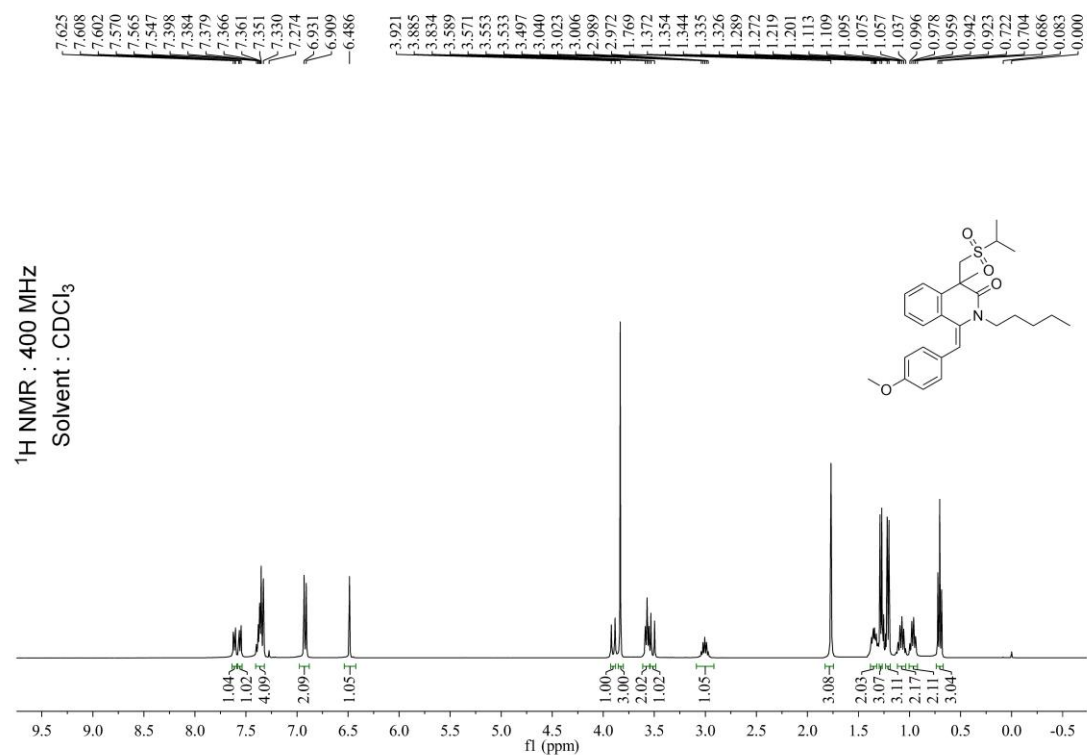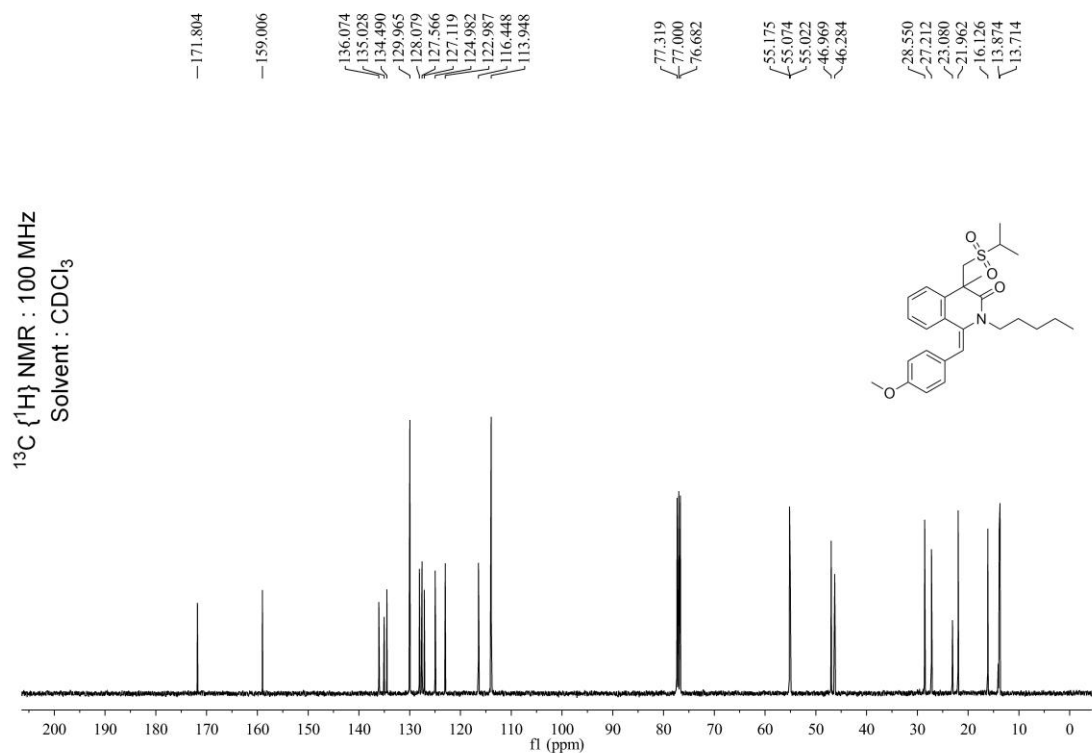

## 2.5 Control Experiments

### GC-MS Analysis of Raw Reaction Mixture by Using BHT as Radical Inhibitor

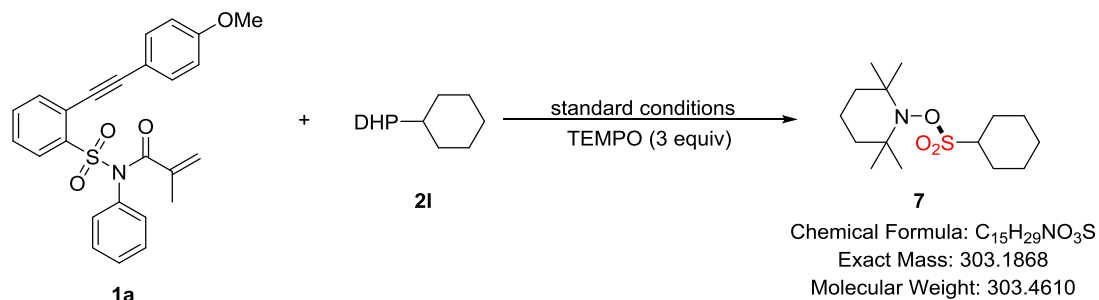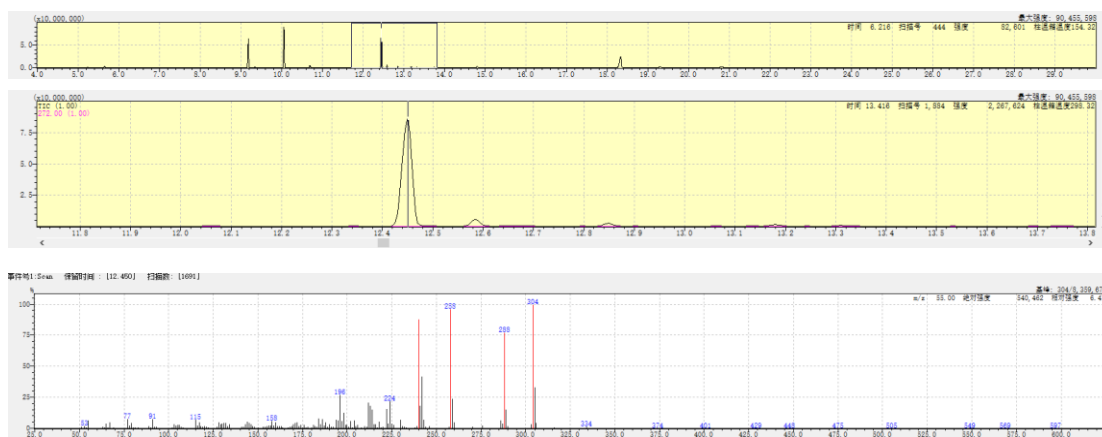

[MS Spectrum]

# of Peaks 533

Raw Spectrum 12.450 (scan : 1691)

Background No Background Spectrum

Base Peak m/z 304.05 (Inten : 8,359,674)

Event# 1

| m/z   | Absolute Intensity | Relative Intensity |
|-------|--------------------|--------------------|
| 50.00 | 21522              | 0.26               |
| 51.00 | 120620             | 1.44               |
| 52.00 | 56444              | 0.68               |
| 53.00 | 174044             | 2.08               |
| 54.05 | 74977              | 0.90               |
| 55.00 | 540462             | 6.47               |
| 56.00 | 37049              | 0.44               |
| 57.00 | 59838              | 0.72               |
| 57.95 | 7284               | 0.09               |
| 58.95 | 11075              | 0.13               |
| 60.05 | 1455               | 0.02               |
| 61.05 | 3726               | 0.04               |
| 62.05 | 19976              | 0.24               |
| 63.00 | 129148             | 1.54               |
| 64.05 | 105425             | 1.26               |
| 65.00 | 336895             | 4.03               |
| 66.05 | 86691              | 1.04               |
| 67.05 | 437016             | 5.23               |
| 68.05 | 59390              | 0.71               |
| 69.05 | 97772              | 1.17               |
| 70.05 | 12067              | 0.14               |
| 71.05 | 20841              | 0.25               |
| 72.05 | 4389               | 0.05               |
| 73.00 | 10010              | 0.12               |
| 74.00 | 8002               | 0.10               |
| 75.00 | 31610              | 0.38               |
| 76.05 | 55581              | 0.66               |
| 77.00 | 632838             | 7.57               |
| 78.05 | 202818             | 2.43               |
| 79.05 | 398233             | 4.76               |
| 80.05 | 85088              | 1.02               |
| 81.05 | 85579              | 1.02               |
| 82.05 | 25268              | 0.30               |
| 83.00 | 78942              | 0.94               |
| 84.05 | 16628              | 0.20               |
| 84.95 | 21751              | 0.26               |
| 85.95 | 6559               | 0.08               |
| 86.95 | 8797               | 0.11               |
| 88.05 | 15131              | 0.18               |
| 89.00 | 158366             | 1.89               |
| 90.05 | 95644              | 1.14               |
| 91.00 | 635620             | 7.60               |
| 92.05 | 141429             | 1.69               |
| 93.05 | 111305             | 1.33               |
| 94.00 | 45809              | 0.55               |
| 95.00 | 30234              | 0.36               |
| 95.60 | 7002               | 0.08               |
| 96.65 | 8048               | 0.10               |

|        |        |      |        |        |      |        |         |       |
|--------|--------|------|--------|--------|------|--------|---------|-------|
| 97.55  | 9295   | 0.11 | 141.05 | 143418 | 1.72 | 185.00 | 318543  | 3.81  |
| 98.55  | 20050  | 0.24 | 142.05 | 140629 | 1.68 | 186.00 | 628111  | 7.51  |
| 99.55  | 5504   | 0.07 | 143.05 | 281297 | 3.36 | 187.00 | 230601  | 2.76  |
| 100.05 | 6435   | 0.08 | 144.05 | 463767 | 5.55 | 188.00 | 428918  | 5.13  |
| 101.00 | 28220  | 0.34 | 145.05 | 364217 | 4.36 | 189.00 | 137121  | 1.64  |
| 102.05 | 82047  | 0.98 | 146.05 | 295538 | 3.54 | 190.00 | 297018  | 3.55  |
| 103.05 | 300507 | 3.59 | 147.00 | 184318 | 2.20 | 191.00 | 108145  | 1.29  |
| 104.05 | 198395 | 2.37 | 148.00 | 142135 | 1.70 | 192.00 | 140850  | 1.68  |
| 105.05 | 263013 | 3.15 | 149.05 | 45052  | 0.54 | 193.05 | 54204   | 0.65  |
| 106.05 | 244007 | 2.92 | 150.00 | 75910  | 0.91 | 194.00 | 607809  | 7.27  |
| 107.05 | 140042 | 1.68 | 151.00 | 40929  | 0.49 | 195.00 | 555026  | 6.64  |
| 108.05 | 79452  | 0.95 | 152.00 | 61137  | 0.73 | 196.00 | 2272230 | 27.18 |
| 109.05 | 30999  | 0.37 | 153.00 | 123526 | 1.48 | 197.00 | 530898  | 6.35  |
| 109.60 | 7258   | 0.09 | 154.00 | 144086 | 1.72 | 198.00 | 1060799 | 12.69 |
| 110.65 | 4273   | 0.05 | 155.00 | 176161 | 2.11 | 199.00 | 242692  | 2.90  |
| 111.55 | 7175   | 0.09 | 156.00 | 207223 | 2.48 | 200.00 | 269079  | 3.22  |
| 112.60 | 20170  | 0.24 | 157.05 | 199748 | 2.39 | 201.00 | 110498  | 1.32  |
| 114.05 | 21271  | 0.25 | 158.00 | 511932 | 6.12 | 201.95 | 507206  | 6.07  |
| 115.05 | 587003 | 7.02 | 159.00 | 224806 | 2.69 | 202.95 | 101018  | 1.21  |
| 116.05 | 231564 | 2.77 | 160.00 | 416833 | 4.99 | 203.95 | 538956  | 6.45  |
| 117.05 | 421159 | 5.04 | 161.00 | 170742 | 2.04 | 204.95 | 153294  | 1.83  |
| 118.05 | 183721 | 2.20 | 162.00 | 174879 | 2.09 | 205.95 | 259690  | 3.11  |
| 119.05 | 127301 | 1.52 | 163.00 | 156604 | 1.87 | 206.95 | 59447   | 0.71  |
| 120.05 | 160423 | 1.92 | 164.00 | 87822  | 1.05 | 208.00 | 70078   | 0.84  |
| 121.10 | 113846 | 1.36 | 165.00 | 48354  | 0.58 | 209.00 | 32558   | 0.39  |
| 122.05 | 86492  | 1.03 | 166.00 | 34482  | 0.41 | 209.95 | 154895  | 1.85  |
| 123.05 | 13626  | 0.16 | 167.00 | 106746 | 1.28 | 211.05 | 117225  | 1.40  |
| 124.00 | 3695   | 0.04 | 168.00 | 138594 | 1.66 | 212.00 | 1775295 | 21.24 |
| 125.05 | 2429   | 0.03 | 169.00 | 158670 | 1.90 | 213.00 | 1549850 | 18.54 |
| 126.05 | 10392  | 0.12 | 170.00 | 290889 | 3.48 | 214.00 | 1265294 | 15.14 |
| 127.05 | 140910 | 1.69 | 171.00 | 365322 | 4.37 | 215.00 | 279140  | 3.34  |
| 128.05 | 407008 | 4.87 | 172.00 | 408774 | 4.89 | 215.95 | 291886  | 3.49  |
| 129.05 | 308792 | 3.69 | 173.00 | 181425 | 2.17 | 217.00 | 93252   | 1.12  |
| 130.05 | 336567 | 4.03 | 174.00 | 270625 | 3.24 | 218.00 | 466735  | 5.58  |
| 131.05 | 369668 | 4.42 | 175.00 | 91377  | 1.09 | 219.00 | 82682   | 0.99  |
| 132.05 | 369948 | 4.43 | 176.00 | 251073 | 3.00 | 219.95 | 119376  | 1.43  |
| 133.05 | 188058 | 2.25 | 177.00 | 95932  | 1.15 | 221.05 | 47847   | 0.57  |
| 134.05 | 281814 | 3.37 | 177.95 | 136822 | 1.64 | 222.00 | 1307022 | 15.63 |
| 135.05 | 61488  | 0.74 | 179.00 | 45929  | 0.55 | 223.00 | 330039  | 3.95  |
| 136.05 | 33213  | 0.40 | 180.00 | 98722  | 1.18 | 224.00 | 1859470 | 22.24 |
| 137.00 | 8932   | 0.11 | 181.00 | 249628 | 2.99 | 225.00 | 350902  | 4.20  |
| 138.05 | 7340   | 0.09 | 182.00 | 180858 | 2.16 | 226.00 | 256175  | 3.06  |
| 139.05 | 16533  | 0.20 | 183.05 | 112389 | 1.34 | 227.00 | 50279   | 0.60  |
| 140.05 | 30807  | 0.37 | 184.00 | 691993 | 8.28 | 228.00 | 56834   | 0.68  |

|        |         |       |        |          |       |               |                |               |
|--------|---------|-------|--------|----------|-------|---------------|----------------|---------------|
| 229.05 | 28165   | 0.34  | 261.00 | 59545    | 0.71  | 293.00        | 204            | 0.00          |
| 230.00 | 586868  | 7.02  | 262.00 | 17759    | 0.21  | 294.00        | 127            | 0.00          |
| 231.00 | 166292  | 1.99  | 263.00 | 3300     | 0.04  | 295.00        | 188            | 0.00          |
| 232.00 | 147690  | 1.77  | 263.90 | 966      | 0.01  | 296.00        | 50             | 0.00          |
| 233.00 | 84204   | 1.01  | 265.00 | 753      | 0.01  | 297.00        | 79             | 0.00          |
| 234.00 | 43910   | 0.53  | 266.05 | 471      | 0.01  | 298.00        | 140            | 0.00          |
| 234.95 | 9862    | 0.12  | 267.05 | 1981     | 0.02  | 299.10        | 166            | 0.00          |
| 236.00 | 26902   | 0.32  | 268.00 | 50361    | 0.60  | 300.10        | 2471           | 0.03          |
| 237.05 | 6244    | 0.07  | 269.05 | 29231    | 0.35  | 301.15        | 953            | 0.01          |
| 238.00 | 97401   | 1.17  | 270.05 | 124402   | 1.49  | <b>302.05</b> | <b>10890</b>   | <b>0.13</b>   |
| 239.05 | 155467  | 1.86  | 271.00 | 28574    | 0.34  | <b>303.15</b> | <b>302057</b>  | <b>3.61</b>   |
| 240.00 | 7376954 | 88.24 | 272.05 | 59750    | 0.71  | <b>304.05</b> | <b>8359674</b> | <b>100.00</b> |
| 241.00 | 1535662 | 18.37 | 272.95 | 11221    | 0.13  | <b>305.05</b> | <b>2785656</b> | <b>33.32</b>  |
| 242.00 | 3507620 | 41.96 | 274.00 | 10804    | 0.13  | <b>306.00</b> | <b>385220</b>  | <b>4.61</b>   |
| 243.00 | 605910  | 7.25  | 275.05 | 9848     | 0.12  | 307.00        | 40990          | 0.49          |
| 244.00 | 117116  | 1.40  | 276.00 | 213298   | 2.55  | 307.95        | 3394           | 0.04          |
| 245.00 | 37098   | 0.44  | 277.00 | 40862    | 0.49  | 309.00        | 356            | 0.00          |
| 246.00 | 157905  | 1.89  | 278.00 | 6967     | 0.08  | 310.00        | 73             | 0.00          |
| 247.00 | 26847   | 0.32  | 278.95 | 796      | 0.01  | 311.00        | 52             | 0.00          |
| 247.95 | 58194   | 0.70  | 280.05 | 404      | 0.00  | 312.00        | 13             | 0.00          |
| 248.95 | 11335   | 0.14  | 280.95 | 1895     | 0.02  | 313.10        | 87             | 0.00          |
| 250.00 | 14122   | 0.17  | 281.95 | 500      | 0.01  | 314.05        | 1862           | 0.02          |
| 251.05 | 6821    | 0.08  | 283.00 | 218      | 0.00  | 315.15        | 4545           | 0.05          |
| 252.00 | 21729   | 0.26  | 284.00 | 767      | 0.01  | 316.05        | 96406          | 1.15          |
| 253.00 | 4367    | 0.05  | 285.05 | 12625    | 0.15  | 317.05        | 22383          | 0.27          |
| 254.00 | 7462    | 0.09  | 286.05 | 574097   | 6.87  | 318.00        | 63617          | 0.76          |
| 255.05 | 2279    | 0.03  | 287.05 | 321084   | 3.84  | 319.00        | 13580          | 0.16          |
| 256.00 | 21222   | 0.25  | 288.05 | 6478418  | 77.50 | 320.00        | 1826           | 0.02          |
| 257.05 | 149687  | 1.79  | 289.00 | 1271367  | 15.21 | 321.00        | 140            | 0.00          |
| 258.00 | 8061702 | 96.44 | 290.00 | 171799   | 2.06  |               |                |               |
| 259.00 | 2018130 | 24.14 | 290.95 | 16673    | 0.20  |               |                |               |
| 260.00 | 433985  | 5.19  | 292.00 | 11450.01 |       |               |                |               |

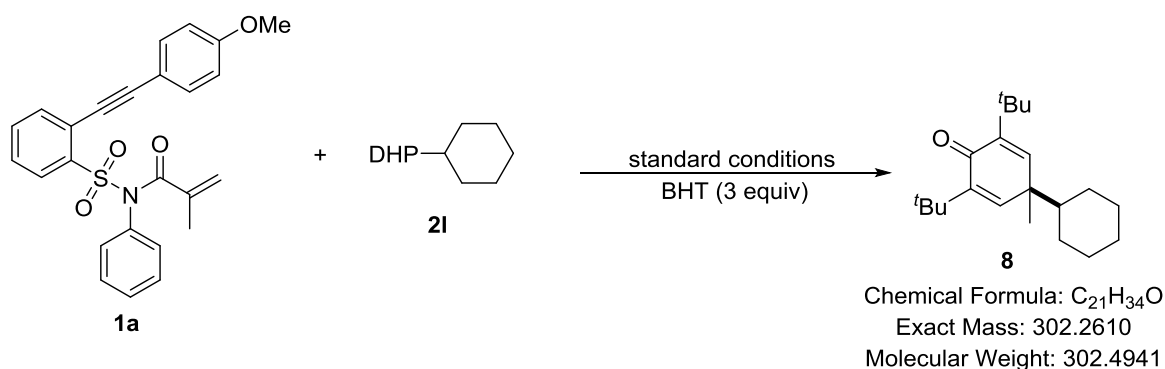



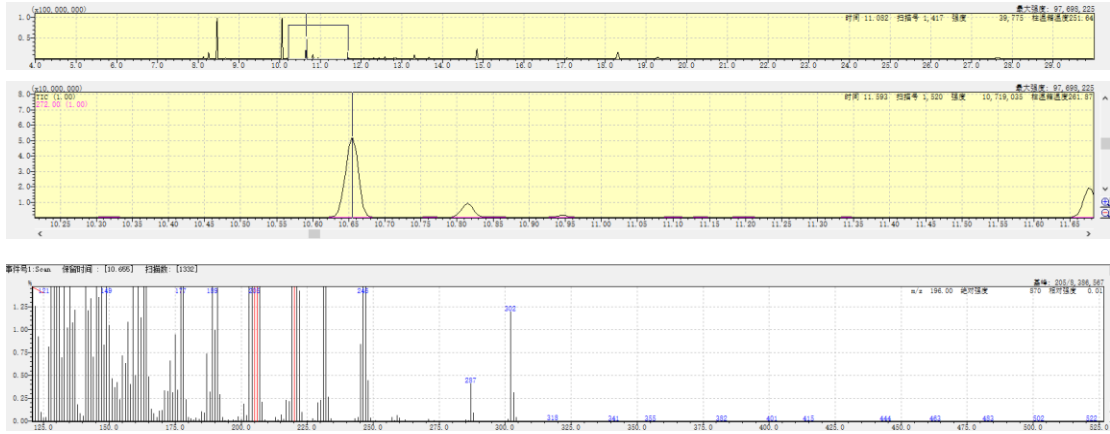

[MS Spectrum]

# of Peaks 538

Raw Spectrum 10.655 (scan : 1332)

Background No Background Spectrum

Base Peak m/z 205.15 (Inten : 8,386,567)

Event# 1

| m/z    | Absolute Intensity | Relative Intensity |
|--------|--------------------|--------------------|
| 50.00  | 6809               | 0.08               |
| 51.00  | 40332              | 0.48               |
| 52.05  | 19594              | 0.23               |
| 53.00  | 236070             | 2.81               |
| 54.05  | 122027             | 1.46               |
| 55.00  | 4199505            | 50.07              |
| 56.05  | 239346             | 2.85               |
| 57.05  | 3382874            | 40.34              |
| 58.05  | 156380             | 1.86               |
| 59.05  | 19516              | 0.23               |
| 60.00  | 11030.01           |                    |
| 61.00  | 660                | 0.01               |
| 62.05  | 1835               | 0.02               |
| 63.00  | 14010              | 0.17               |
| 64.05  | 14792              | 0.18               |
| 65.00  | 145498             | 1.73               |
| 66.05  | 35253              | 0.42               |
| 67.05  | 321014             | 3.83               |
| 68.15  | 29980              | 0.36               |
| 69.05  | 309892             | 3.70               |
| 70.10  | 23412              | 0.28               |
| 71.05  | 38769              | 0.46               |
| 72.00  | 5238               | 0.06               |
| 73.00  | 6785               | 0.08               |
| 74.00  | 2823               | 0.03               |
| 75.05  | 4159               | 0.05               |
| 76.05  | 10606              | 0.13               |
| 77.00  | 304729             | 3.63               |
| 78.05  | 70327              | 0.84               |
| 79.05  | 341159             | 4.07               |
| 80.05  | 42643              | 0.51               |
| 81.05  | 234551             | 2.80               |
| 82.15  | 71898              | 0.86               |
| 83.05  | 2114389            | 25.21              |
| 84.05  | 144025             | 1.72               |
| 85.05  | 8848               | 0.11               |
| 86.05  | 3796               | 0.05               |
| 87.10  | 2761               | 0.03               |
| 88.05  | 2281               | 0.03               |
| 89.05  | 15866              | 0.19               |
| 90.05  | 11726              | 0.14               |
| 91.05  | 603855             | 7.20               |
| 92.05  | 71391              | 0.85               |
| 93.05  | 182759             | 2.18               |
| 94.10  | 26769              | 0.32               |
| 95.05  | 132991             | 1.59               |
| 96.10  | 15004              | 0.18               |
| 97.05  | 82787              | 0.99               |
| 98.05  | 6815               | 0.08               |
| 99.10  | 2106               | 0.03               |
| 100.05 | 1702               | 0.02               |
| 100.95 | 3923               | 0.05               |
| 102.05 | 16732              | 0.20               |
| 103.05 | 91667              | 1.09               |
| 104.15 | 47553              | 0.57               |
| 105.05 | 756068             | 9.02               |
| 106.05 | 93873              | 1.12               |
| 107.05 | 215700             | 2.57               |
| 108.10 | 52647              | 0.63               |
| 109.10 | 124522             | 1.48               |
| 110.10 | 16620              | 0.20               |
| 111.05 | 16405              | 0.20               |
| 112.05 | 1489               | 0.02               |
| 113.05 | 1720               | 0.02               |
| 114.05 | 5612               | 0.07               |
| 115.05 | 273736             | 3.26               |
| 116.05 | 126372             | 1.51               |
| 117.05 | 196642             | 2.34               |
| 118.15 | 47222              | 0.56               |
| 119.10 | 543036             | 6.48               |
| 120.15 | 99672              | 1.19               |
| 121.05 | 801221             | 9.55               |
| 122.10 | 106156             | 1.27               |
| 123.10 | 77820              | 0.93               |
| 124.10 | 8794               | 0.10               |
| 125.15 | 3286               | 0.04               |
| 126.15 | 4042               | 0.05               |
| 127.05 | 68405              | 0.82               |

|        |          |      |        |         |        |        |          |       |
|--------|----------|------|--------|---------|--------|--------|----------|-------|
| 128.05 | 238850   | 2.85 | 172.05 | 28108   | 0.34   | 216.15 | 2424     | 0.03  |
| 129.05 | 262977   | 3.14 | 173.00 | 56058   | 0.67   | 217.05 | 19796    | 0.24  |
| 130.10 | 154434   | 1.84 | 174.05 | 26562   | 0.32   | 218.15 | 18528    | 0.22  |
| 131.10 | 289782   | 3.46 | 175.05 | 79585   | 0.95   | 219.15 | 304440   | 3.63  |
| 132.10 | 58922    | 0.70 | 176.05 | 29307   | 0.35   | 220.10 | 7353194  | 87.68 |
| 133.10 | 344977   | 4.11 | 177.05 | 1267394 | 15.11  | 221.05 | 1345980  | 16.05 |
| 134.10 | 86180    | 1.03 | 178.00 | 186532  | 2.22   | 222.05 | 120129   | 1.43  |
| 135.05 | 339701   | 4.05 | 179.05 | 20347   | 0.24   | 223.00 | 8823     | 0.11  |
| 136.10 | 90906    | 1.08 | 180.00 | 4103    | 0.05   | 223.95 | 803      | 0.01  |
| 137.10 | 102348   | 1.22 | 180.95 | 3146    | 0.04   | 225.05 | 986      | 0.01  |
| 138.10 | 15606    | 0.19 | 181.95 | 1608    | 0.02   | 225.95 | 298      | 0.00  |
| 139.00 | 7354     | 0.09 | 183.00 | 3625    | 0.04   | 227.10 | 3103     | 0.04  |
| 140.15 | 5419     | 0.06 | 184.05 | 2481    | 0.03   | 228.05 | 982      | 0.01  |
| 141.05 | 158961   | 1.90 | 185.00 | 9479    | 0.11   | 229.05 | 17616    | 0.21  |
| 142.05 | 101892   | 1.21 | 186.05 | 7958    | 0.09   | 230.15 | 19593    | 0.23  |
| 143.05 | 113123   | 1.35 | 187.05 | 62106   | 0.74   | 231.05 | 1042142  | 12.43 |
| 144.05 | 59236    | 0.71 | 188.05 | 27144   | 0.32   | 232.05 | 192490   | 2.30  |
| 145.05 | 640304   | 7.63 | 189.05 | 490030  | 5.84   | 233.05 | 22753    | 0.27  |
| 146.05 | 114086   | 1.36 | 190.05 | 84052   | 1.00   | 234.10 | 2817     | 0.03  |
| 147.05 | 213571   | 2.55 | 191.05 | 122603  | 1.46   | 235.05 | 466      | 0.01  |
| 148.05 | 70545    | 0.84 | 192.05 | 25284   | 0.30   | 236.00 | 506      | 0.01  |
| 149.05 | 694343   | 8.28 | 193.00 | 4081    | 0.05   | 237.00 | 143      | 0.00  |
| 150.05 | 88283    | 1.05 | 193.95 | 1280    | 0.02   | 238.00 | 100      | 0.00  |
| 151.05 | 39775    | 0.47 | 195.00 | 1889    | 0.02   | 239.00 | 313      | 0.00  |
| 152.05 | 31247    | 0.37 | 196.00 | 870     | 0.01   | 240.00 | 354      | 0.00  |
| 153.00 | 35881    | 0.43 | 197.05 | 1787    | 0.02   | 241.15 | 669      | 0.01  |
| 154.00 | 20559    | 0.25 | 198.00 | 914     | 0.01   | 242.05 | 451      | 0.01  |
| 155.05 | 60745    | 0.72 | 199.00 | 4458    | 0.05   | 243.10 | 2742     | 0.03  |
| 156.05 | 53540    | 0.64 | 200.05 | 2424    | 0.03   | 244.15 | 4333     | 0.05  |
| 157.05 | 91156    | 1.09 | 201.00 | 16167   | 0.19   | 245.15 | 71076    | 0.85  |
| 158.05 | 34526    | 0.41 | 202.05 | 6107    | 0.07   | 246.10 | 2027169  | 24.17 |
| 159.05 | 132056   | 1.57 | 203.05 | 179979  | 2.15   | 247.05 | 391228   | 4.66  |
| 160.05 | 42642    | 0.51 | 204.15 | 361699  | 4.31   | 248.05 | 37736    | 0.45  |
| 161.00 | 553814   | 6.60 | 205.15 | 8386567 | 100.00 | 249.00 | 3492     | 0.04  |
| 162.05 | 95458    | 1.14 | 206.05 | 3925366 | 46.81  | 250.00 | 508      | 0.01  |
| 163.05 | 380380   | 4.54 | 207.05 | 279605  | 3.33   | 251.00 | 1446     | 0.02  |
| 164.05 | 150176   | 1.79 | 208.05 | 18085   | 0.22   | 252.00 | 398      | 0.00  |
| 165.05 | 41217    | 0.49 | 208.95 | 1514    | 0.02   | 253.00 | 284      | 0.00  |
| 166.05 | 11783    | 0.14 | 210.00 | 439     | 0.01   | 254.00 | 145      | 0.00  |
| 167.00 | 7780     | 0.09 | 211.00 | 799     | 0.01   | 255.00 | 276      | 0.00  |
| 168.00 | 39110.05 |      | 212.00 | 844     | 0.01   | 256.10 | 218      | 0.00  |
| 169.00 | 10004    | 0.12 | 213.05 | 3889    | 0.05   | 257.10 | 4273     | 0.05  |
| 170.05 | 10266    | 0.12 | 214.05 | 1542    | 0.02   | 258.10 | 11260.01 |       |
| 171.05 | 28473    | 0.34 | 215.05 | 6276    | 0.07   | 259.10 | 5820     | 0.07  |

|        |      |      |        |       |      |               |               |             |
|--------|------|------|--------|-------|------|---------------|---------------|-------------|
| 260.05 | 3486 | 0.04 | 280.00 | 156   | 0.00 | <b>301.15</b> | <b>2265</b>   | <b>0.03</b> |
| 261.05 | 742  | 0.01 | 280.90 | 657   | 0.01 | <b>302.15</b> | <b>100451</b> | <b>1.20</b> |
| 262.05 | 1480 | 0.02 | 281.90 | 145   | 0.00 | <b>303.15</b> | <b>26701</b>  | <b>0.32</b> |
| 262.95 | 559  | 0.01 | 282.90 | 302   | 0.00 | <b>304.10</b> | <b>3831</b>   | <b>0.05</b> |
| 264.00 | 212  | 0.00 | 283.90 | 60    | 0.00 | 305.10        | 233           | 0.00        |
| 265.00 | 156  | 0.00 | 285.10 | 1756  | 0.02 | 306.10        | 132           | 0.00        |
| 266.00 | 84   | 0.00 | 286.15 | 1013  | 0.01 | 307.10        | 38            | 0.00        |
| 267.00 | 202  | 0.00 | 287.10 | 35177 | 0.42 | 308.10        | 10            | 0.00        |
| 268.00 | 284  | 0.00 | 288.05 | 8209  | 0.10 | 309.10        | 27            | 0.00        |
| 269.10 | 636  | 0.01 | 289.10 | 871   | 0.01 | 310.10        | 11            | 0.00        |
| 270.10 | 246  | 0.00 | 290.10 | 180   | 0.00 | 311.10        | 18            | 0.00        |
| 271.10 | 2377 | 0.03 | 291.10 | 54    | 0.00 | 312.10        | 78            | 0.00        |
| 272.05 | 721  | 0.01 | 292.10 | 19    | 0.00 | 314.10        | 84            | 0.00        |
| 273.15 | 969  | 0.01 | 294.10 | 19    | 0.00 | 315.10        | 5             | 0.00        |
| 274.00 | 423  | 0.01 | 295.10 | 57    | 0.00 | 316.10        | 14            | 0.00        |
| 275.00 | 110  | 0.00 | 296.10 | 18    | 0.00 | 317.10        | 55            | 0.00        |
| 276.00 | 100  | 0.00 | 297.10 | 62    | 0.00 | 318.05        | 363           | 0.00        |
| 277.00 | 113  | 0.00 | 298.10 | 57    | 0.00 | 319.10        | 84            | 0.00        |
| 278.00 | 57   | 0.00 | 299.10 | 153   | 0.00 | 320.10        | 47            | 0.00        |
| 279.00 | 50   | 0.00 | 300.05 | 703   | 0.01 |               |               |             |

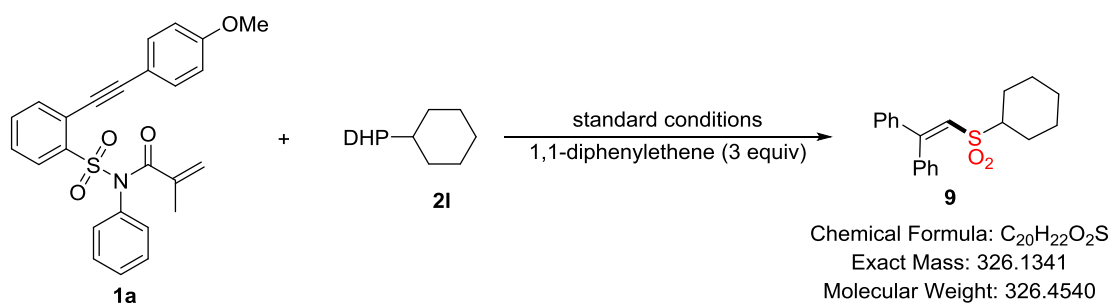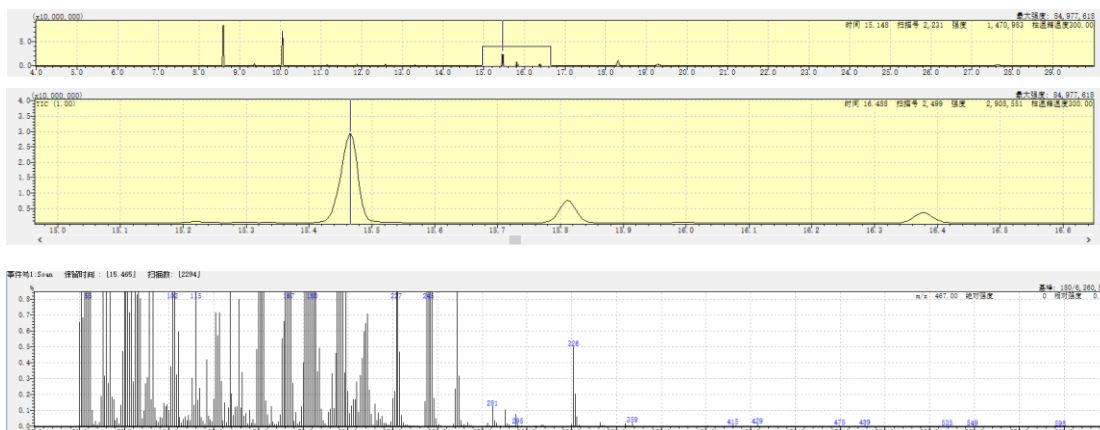

[MS Spectrum]

# of Peaks 547

Raw Spectrum 15.465 (scan : 2294)

Background No Background Spectrum

Base Peak m/z 180.00 (Inten : 6,260,562)

Event# 1

| m/z   | Absolute Intensity | Relative Intensity | m/z    | Absolute Intensity | Relative Intensity | m/z    | Absolute Intensity | Relative Intensity |
|-------|--------------------|--------------------|--------|--------------------|--------------------|--------|--------------------|--------------------|
| 50.00 | 41393              | 0.66               | 87.00  | 17070              | 0.27               | 124.05 | 2029               | 0.03               |
| 51.00 | 222874             | 3.56               | 88.05  | 19585              | 0.31               | 125.05 | 11097              | 0.18               |
| 52.00 | 43022              | 0.69               | 89.05  | 66916              | 1.07               | 126.05 | 45140              | 0.72               |
| 53.00 | 122551             | 1.96               | 90.00  | 10772              | 0.17               | 127.05 | 36064              | 0.58               |
| 54.05 | 111968             | 1.79               | 91.05  | 62792              | 1.00               | 128.05 | 45091              | 0.72               |
| 55.05 | 2705470            | 43.21              | 92.05  | 7563               | 0.12               | 129.05 | 18015              | 0.29               |
| 56.05 | 122769             | 1.96               | 93.00  | 2463               | 0.04               | 130.05 | 2442               | 0.04               |
| 57.05 | 6622               | 0.11               | 94.05  | 1844               | 0.03               | 131.10 | 9542               | 0.15               |
| 57.95 | 1047               | 0.02               | 95.00  | 3804               | 0.06               | 132.05 | 1815               | 0.03               |
| 59.00 | 2274               | 0.04               | 96.05  | 3566               | 0.06               | 133.05 | 7604               | 0.12               |
| 59.95 | 765                | 0.01               | 97.00  | 9225               | 0.15               | 134.00 | 66126              | 1.06               |
| 61.00 | 1809               | 0.03               | 98.00  | 7970               | 0.13               | 135.05 | 12940              | 0.21               |
| 62.00 | 12033              | 0.19               | 98.95  | 8819               | 0.14               | 136.00 | 4466               | 0.07               |
| 63.00 | 60458              | 0.97               | 100.05 | 6492               | 0.10               | 137.05 | 7642               | 0.12               |
| 64.00 | 20033              | 0.32               | 101.05 | 23762              | 0.38               | 138.05 | 7931               | 0.13               |
| 65.05 | 57339              | 0.92               | 102.05 | 208570             | 3.33               | 139.05 | 50287              | 0.80               |
| 66.15 | 17319              | 0.28               | 103.05 | 186824             | 2.98               | 140.05 | 7517               | 0.12               |
| 67.05 | 175589             | 2.80               | 104.05 | 20535              | 0.33               | 141.05 | 21524              | 0.34               |
| 68.05 | 11780              | 0.19               | 105.05 | 37502              | 0.60               | 142.05 | 4157               | 0.07               |
| 69.00 | 10799              | 0.17               | 106.00 | 3745               | 0.06               | 143.10 | 5340               | 0.09               |
| 69.95 | 2399               | 0.04               | 107.05 | 1502               | 0.02               | 144.10 | 11460.02           |                    |
| 71.00 | 3548               | 0.06               | 108.05 | 2882               | 0.05               | 145.05 | 6565               | 0.10               |
| 72.05 | 1367               | 0.02               | 109.00 | 3894               | 0.06               | 146.05 | 1527               | 0.02               |
| 73.05 | 8394               | 0.13               | 110.05 | 2614               | 0.04               | 146.95 | 3009               | 0.05               |
| 74.00 | 29674              | 0.47               | 111.00 | 4471               | 0.07               | 148.05 | 1337               | 0.02               |
| 75.00 | 55631              | 0.89               | 112.05 | 2533               | 0.04               | 149.00 | 30626              | 0.49               |
| 76.00 | 140106             | 2.24               | 113.05 | 19328              | 0.31               | 150.00 | 62402              | 1.00               |
| 77.00 | 302484             | 4.83               | 114.05 | 85110.14           |                    | 151.05 | 186571             | 2.98               |
| 78.05 | 44994              | 0.72               | 115.05 | 86870              | 1.39               | 152.00 | 511708             | 8.17               |
| 79.05 | 76929              | 1.23               | 116.05 | 10439              | 0.17               | 153.00 | 91327              | 1.46               |
| 80.05 | 17847              | 0.29               | 117.05 | 15360              | 0.25               | 154.00 | 10207              | 0.16               |
| 81.05 | 131959             | 2.11               | 118.00 | 3794               | 0.06               | 155.05 | 4873               | 0.08               |
| 82.15 | 52142              | 0.83               | 119.00 | 2231               | 0.04               | 156.15 | 1082               | 0.02               |
| 83.05 | 739205             | 11.81              | 120.05 | 883                | 0.01               | 157.05 | 8103               | 0.13               |
| 84.05 | 50696              | 0.81               | 121.00 | 26530              | 0.42               | 158.00 | 2062               | 0.03               |
| 85.05 | 3375               | 0.05               | 122.00 | 4273               | 0.07               | 159.05 | 932                | 0.01               |
| 86.00 | 6303               | 0.10               | 123.00 | 2788               | 0.04               | 160.00 | 983                | 0.02               |

|        |          |        |        |         |       |        |          |      |
|--------|----------|--------|--------|---------|-------|--------|----------|------|
| 161.05 | 2033     | 0.03   | 205.00 | 17894   | 0.29  | 248.95 | 3338     | 0.05 |
| 162.05 | 4793     | 0.08   | 205.95 | 5639    | 0.09  | 249.95 | 581      | 0.01 |
| 163.00 | 34727    | 0.55   | 206.95 | 20357   | 0.33  | 250.90 | 935      | 0.01 |
| 164.05 | 41541    | 0.66   | 207.95 | 26982   | 0.43  | 251.95 | 379      | 0.01 |
| 165.00 | 717175   | 11.46  | 208.95 | 37576   | 0.60  | 252.95 | 357      | 0.01 |
| 166.05 | 156699   | 2.50   | 209.95 | 40832   | 0.65  | 253.90 | 162      | 0.00 |
| 167.00 | 967154   | 15.45  | 210.95 | 44580   | 0.71  | 254.90 | 255      | 0.00 |
| 168.00 | 150026   | 2.40   | 211.95 | 14468   | 0.23  | 255.90 | 351      | 0.01 |
| 169.00 | 17186    | 0.27   | 212.95 | 5072    | 0.08  | 256.90 | 327      | 0.01 |
| 170.00 | 2278     | 0.04   | 213.95 | 819     | 0.01  | 258.00 | 342      | 0.01 |
| 170.95 | 5676     | 0.09   | 214.95 | 8912    | 0.14  | 259.05 | 984      | 0.02 |
| 172.00 | 1274     | 0.02   | 216.00 | 2474    | 0.04  | 260.05 | 14925    | 0.24 |
| 173.05 | 2009     | 0.03   | 216.95 | 5401    | 0.09  | 261.05 | 76302    | 1.22 |
| 174.00 | 8084     | 0.13   | 218.00 | 2966    | 0.05  | 262.00 | 20150    | 0.32 |
| 175.05 | 25195    | 0.40   | 219.05 | 4314    | 0.07  | 263.05 | 2439     | 0.04 |
| 176.00 | 369460   | 5.90   | 220.00 | 1428    | 0.02  | 263.95 | 404      | 0.01 |
| 177.05 | 354760   | 5.67   | 220.95 | 1591    | 0.03  | 264.90 | 11190.02 |      |
| 178.00 | 2695054  | 43.05  | 221.95 | 740     | 0.01  | 265.95 | 577      | 0.01 |
| 179.00 | 3261786  | 52.10  | 223.00 | 794     | 0.01  | 266.90 | 1639     | 0.03 |
| 180.00 | 6260562  | 100.00 | 224.00 | 1942    | 0.03  | 268.00 | 550      | 0.01 |
| 181.00 | 982846   | 15.70  | 224.95 | 11225   | 0.18  | 269.00 | 399      | 0.01 |
| 182.00 | 78798    | 1.26   | 225.95 | 13907   | 0.22  | 270.00 | 111      | 0.00 |
| 183.00 | 21687    | 0.35   | 226.95 | 436966  | 6.98  | 271.00 | 130      | 0.00 |
| 183.95 | 31101    | 0.50   | 227.90 | 92298   | 1.47  | 272.00 | 70       | 0.00 |
| 184.95 | 71180.11 |        | 228.90 | 29599   | 0.47  | 273.00 | 146      | 0.00 |
| 185.95 | 2590     | 0.04   | 229.95 | 4522    | 0.07  | 274.00 | 220      | 0.00 |
| 187.00 | 11670.02 |        | 231.00 | 1686    | 0.03  | 275.00 | 132      | 0.00 |
| 187.95 | 507      | 0.01   | 232.05 | 794     | 0.01  | 276.00 | 287      | 0.00 |
| 189.00 | 5692     | 0.09   | 233.00 | 766     | 0.01  | 277.10 | 406      | 0.01 |
| 190.00 | 6986     | 0.11   | 234.10 | 518     | 0.01  | 278.10 | 1535     | 0.02 |
| 191.00 | 21129    | 0.34   | 235.05 | 492     | 0.01  | 279.05 | 394      | 0.01 |
| 192.00 | 7335     | 0.12   | 236.00 | 326     | 0.01  | 280.00 | 143      | 0.00 |
| 193.05 | 29108    | 0.46   | 237.05 | 391     | 0.01  | 280.95 | 7928     | 0.13 |
| 194.05 | 176487   | 2.82   | 238.00 | 199     | 0.00  | 281.95 | 2443     | 0.04 |
| 195.00 | 1628287  | 26.01  | 238.90 | 442     | 0.01  | 282.90 | 1575     | 0.03 |
| 196.00 | 1145332  | 18.29  | 239.90 | 247     | 0.00  | 283.90 | 335      | 0.01 |
| 196.95 | 188937   | 3.02   | 240.90 | 124     | 0.00  | 285.00 | 494      | 0.01 |
| 198.00 | 21260    | 0.34   | 241.90 | 210     | 0.00  | 286.00 | 159      | 0.00 |
| 198.95 | 84565    | 1.35   | 242.95 | 9891    | 0.16  | 286.90 | 140      | 0.00 |
| 199.95 | 14010    | 0.22   | 243.95 | 77592   | 1.24  | 287.95 | 6829     | 0.11 |
| 200.95 | 5172     | 0.08   | 244.95 | 1056508 | 16.88 | 288.90 | 1255     | 0.02 |
| 201.95 | 8367     | 0.13   | 245.95 | 172713  | 2.76  | 290.00 | 796      | 0.01 |
| 203.00 | 10820    | 0.17   | 246.95 | 81324   | 1.30  | 291.00 | 394      | 0.01 |
| 204.00 | 10887    | 0.17   | 247.90 | 11220   | 0.18  | 292.00 | 386      | 0.01 |

|        |      |      |        |     |      |               |              |             |
|--------|------|------|--------|-----|------|---------------|--------------|-------------|
| 293.05 | 411  | 0.01 | 309.00 | 742 | 0.01 | <b>325.05</b> | <b>1021</b>  | <b>0.02</b> |
| 294.00 | 4934 | 0.08 | 310.00 | 270 | 0.00 | <b>326.00</b> | <b>31548</b> | <b>0.50</b> |
| 295.00 | 1076 | 0.02 | 311.00 | 262 | 0.00 | <b>326.95</b> | <b>13098</b> | <b>0.21</b> |
| 296.00 | 329  | 0.01 | 312.00 | 106 | 0.00 | <b>327.95</b> | <b>4127</b>  | <b>0.07</b> |
| 297.00 | 388  | 0.01 | 313.00 | 300 | 0.00 | 329.05        | 743          | 0.01        |
| 298.00 | 175  | 0.00 | 314.00 | 65  | 0.00 | 330.00        | 348          | 0.01        |
| 299.00 | 188  | 0.00 | 315.00 | 169 | 0.00 | 331.00        | 94           | 0.00        |
| 300.00 | 239  | 0.00 | 316.00 | 82  | 0.00 | 332.00        | 21           | 0.00        |
| 301.00 | 60   | 0.00 | 317.00 | 132 | 0.00 | 333.00        | 94           | 0.00        |
| 302.00 | 76   | 0.00 | 318.00 | 134 | 0.00 | 334.00        | 66           | 0.00        |
| 303.00 | 97   | 0.00 | 319.00 | 220 | 0.00 | 335.00        | 78           | 0.00        |
| 304.00 | 247  | 0.00 | 320.00 | 183 | 0.00 | 336.00        | 58           | 0.00        |
| 305.05 | 396  | 0.01 | 321.00 | 90  | 0.00 |               |              |             |
| 306.00 | 70   | 0.00 | 322.00 | 81  | 0.00 |               |              |             |
| 307.00 | 58   | 0.00 | 323.00 | 24  | 0.00 |               |              |             |
| 307.95 | 750  | 0.01 | 324.00 | 204 | 0.00 |               |              |             |

#### The date and NMR spectra of 9.

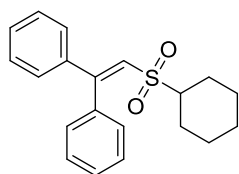

**(2-(cyclohexylsulfonyl)ethene-1,1-diyl)dibenzene (9):** yield:

33.2 mg, 51%; yellow oil;  $^1\text{H}$  NMR (400 MHz,  $\text{CDCl}_3$ )  $\delta$ : 7.37-

7.31 (m, 4H), 7.30-7.26 (m, 2H), 7.20 (d,  $J = 9.2$  Hz, 2H), 6.62

(s, 1H), 2.42-2.33 (m, 1H), 2.00 (d,  $J = 13.2$  Hz, 1H), 1.78 (d,  $J$

= 13.2 Hz, 1H), 1.59-1.53 (m, 2H), 1.47-1.37 (m, 2H), 1.08-

0.97 (m, 2H);  $^{13}\text{C}\{^1\text{H}\}$  NMR (100 MHz,  $\text{CDCl}_3$ )  $\delta$ : 155.7, 139.5, 135.9, 130.2, 129.6,

129.2, 128.6, 128.3, 128.0, 124.4, 62.0, 25.1, 25.1, 24.9; HRMS (ESI-TOF)  $m/z$ :

$\text{C}_{20}\text{H}_{23}\text{O}_2\text{S}(\text{M} + \text{H})^+$  calcd for 327.1413, found 327.1416.

### (2-(cyclohexylsulfonyl)ethene-1,1-diy)dibenzene (9)

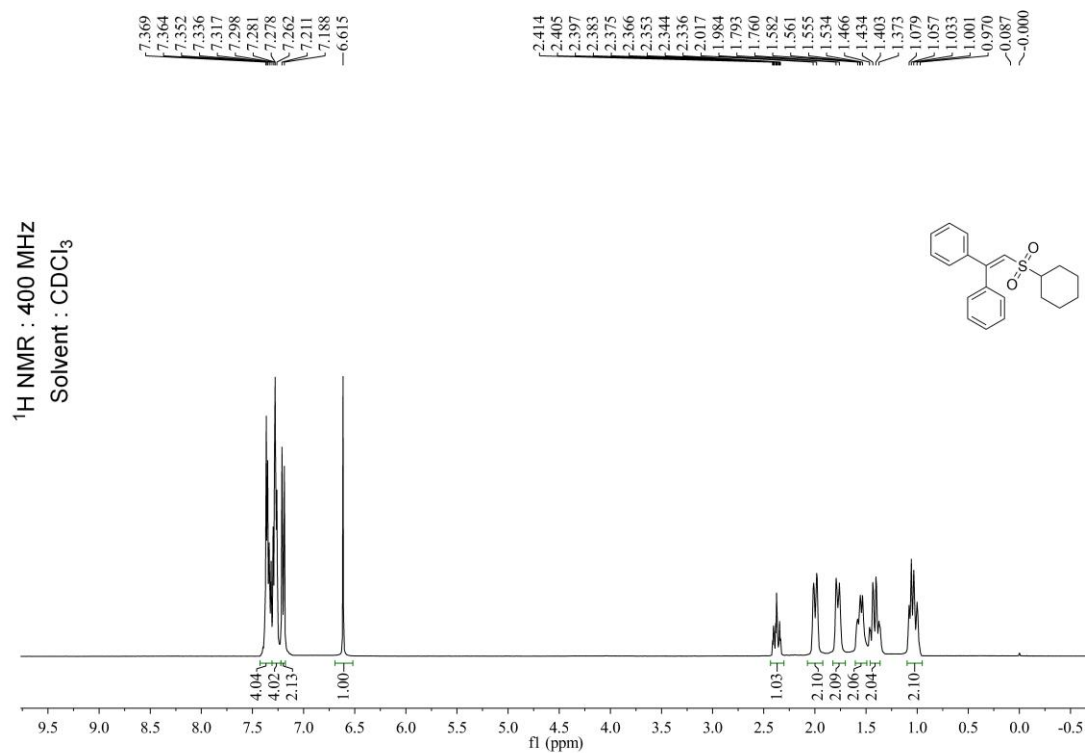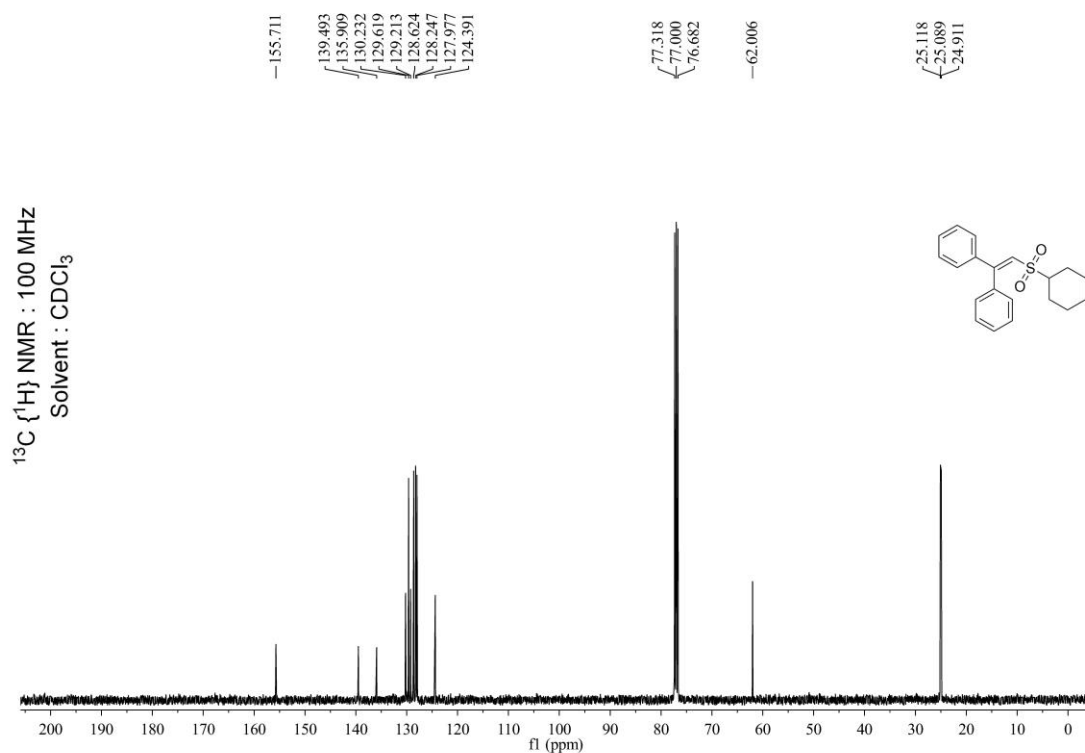

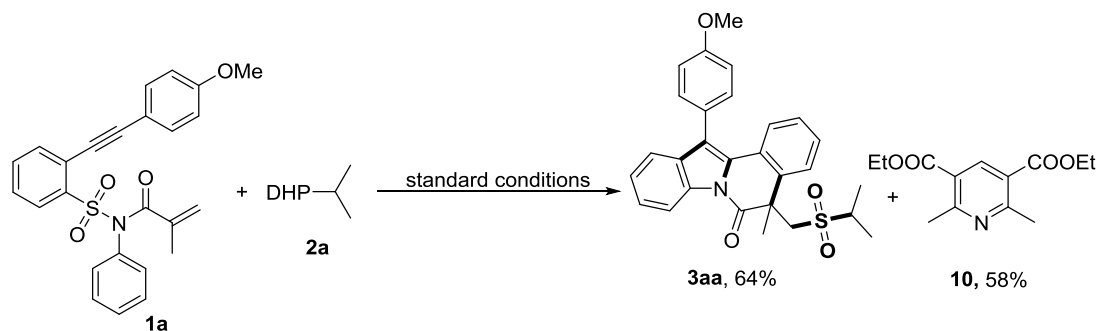

To a schlenk tube were added *N*-(aryl)[(2-ethynyl)arylsulfonyl]acrylamide **1a** (1.0 mmol, 431.1 mg), Hantzsch esters **2a** (2 equiv., 2.0 mmol, 590.4 mg), under standard conditions and argon atmosphere for 36 hours. The residue was purified by silica gel rapid column chromatography to give **10** (58% yield) as a white solid.

**The date and NMR spectra of 10.**

**Diethyl-2,6-dimethylpyridine-3,5-dicarboxylate (10):** Yield: 291.3 mg, 58%; white solid, mp 63.1-63.6 °C (uncorrected); <sup>1</sup>H NMR (400 MHz, CDCl<sub>3</sub>) δ: 8.68 (s, 1H), 4.44-4.37 (m, 4H), 2.85 (s, 6H), 1.42 (t, *J* = 7.0 Hz, 6H); <sup>13</sup>C{<sup>1</sup>H}NMR (100 MHz, CDCl<sub>3</sub>) δ: 165.8, 162.1, 140.8, 122.9, 61.3, 24.8, 14.2; HRMS (ESI-TOF) *m/z*: C<sub>13</sub>H<sub>18</sub>NO<sub>4</sub> (M + H)<sup>+</sup> calcd for 252.2820, found 252.2825.

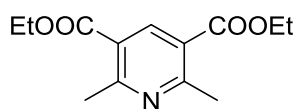



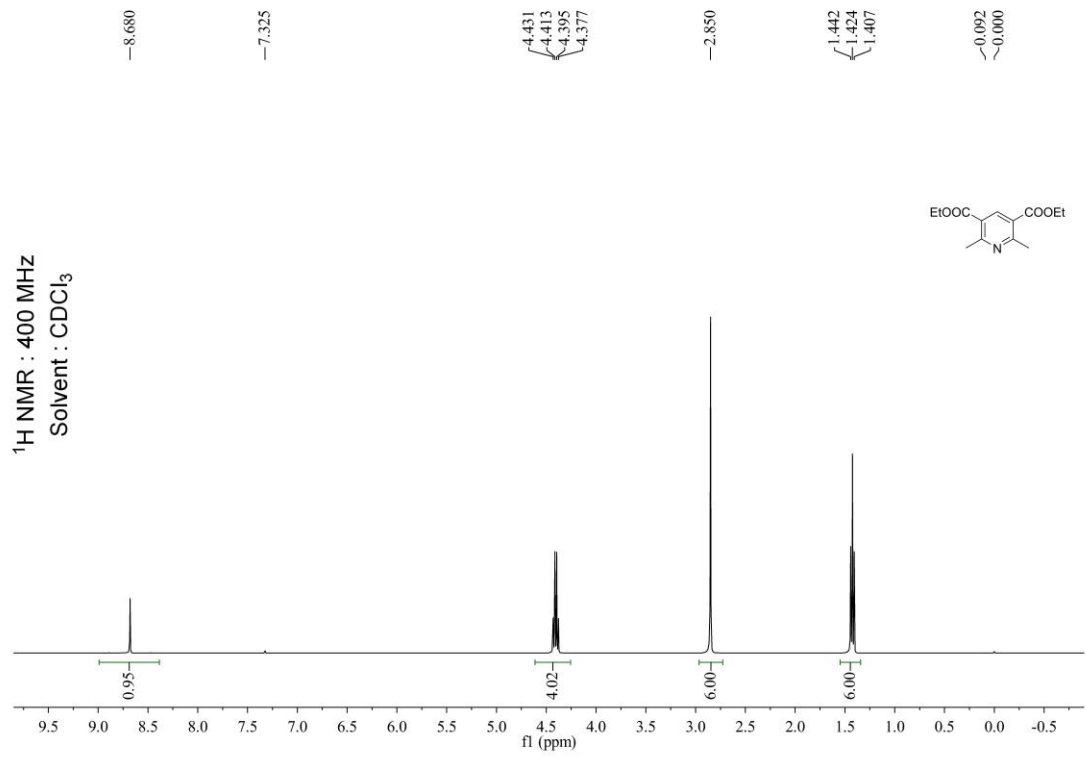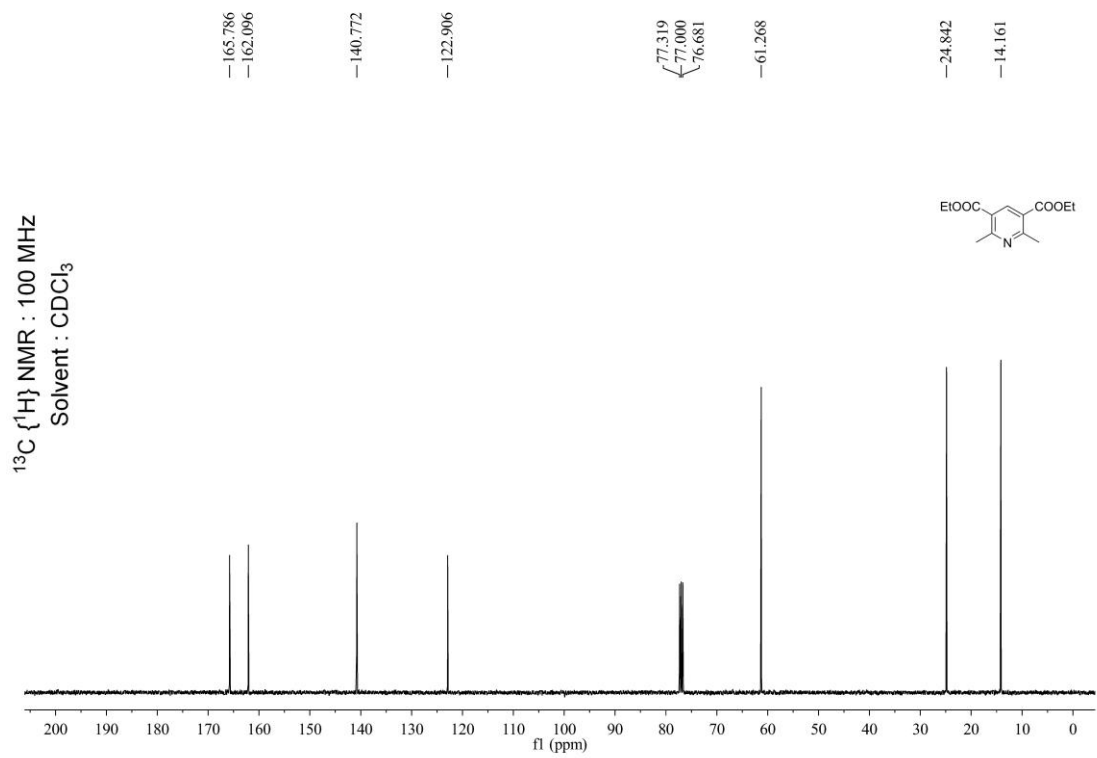

### 3. Characterization Data for All Products

#### 5-((isopropylsulfonyl)methyl)-12-(4-methoxyphenyl)-5-methylindolo[2,1-

**a]isoquinolin-6-(5H)-one (3aa):** Yield: 66.2 mg, 70%; yellow oil;  $^1\text{H}$  NMR (400 MHz,  $\text{CDCl}_3$ )  $\delta$ : 8.60 (d,  $J = 8.0$  Hz, 1H), 7.53 (d,  $J = 8.0$  Hz, 1H), 7.47 (d,  $J = 8.0$  Hz, 1H), 7.44-7.37 (m, 3H), 7.33-7.24 (m, 3H), 7.10-7.05 (m, 3H), 4.46 (d,  $J = 14.4$  Hz, 1H), 3.92 (s, 3H), 3.79 (d,  $J = 14.4$  Hz, 1H), 3.03-2.92 (m, 1H), 1.71 (s, 3H), 1.36 (d,  $J = 6.8$  Hz, 3H), 1.29 (d,  $J = 6.8$  Hz, 3H);  $^{13}\text{C}\{^1\text{H}\}$  NMR (100 MHz,  $\text{CDCl}_3$ )  $\delta$ : 171.1, 159.4, 135.4, 134.3, 132.7, 131.3, 129.2, 128.0, 127.3, 126.2, 125.9, 125.8, 125.6, 125.0, 124.5, 120.6, 119.5, 116.6, 114.6, 57.1, 55.5, 55.3, 46.8, 31.3, 15.4, 14.5; HRMS (ESI-TOF)  $m/z$ :  $\text{C}_{28}\text{H}_{28}\text{NO}_4\text{S}$  ( $\text{M} + \text{H}$ ) $^+$  calcd for 474.1734, found 474.1738.

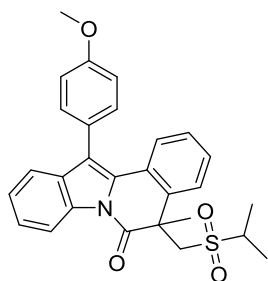

#### 12-(4-(tert-butyl)phenyl)-5-((isopropylsulfonyl)methyl)-5-methylindolo[2,1-

**a]isoquinolin-6-(5H)-one (3ba):** Yield: 53.9 mg, 54%; yellow oil;  $^1\text{H}$  NMR (400 MHz,  $\text{CDCl}_3$ )  $\delta$ : 8.61 (d,  $J = 8.4$  Hz, 1H), 7.55-7.52 (m, 3H), 7.48-7.36 (m, 4H), 7.33-7.23 (m, 3H), 7.06 (t,  $J = 8.2$  Hz, 1H), 4.45 (d,  $J = 14.4$  Hz, 1H), 3.79 (d,  $J = 14.4$  Hz, 1H), 3.00-2.93 (m, 1H), 1.71 (s, 3H), 1.43 (s, 9H), 1.35 (d,  $J = 6.8$  Hz, 3H), 1.29 (d,  $J = 6.8$  Hz, 3H);  $^{13}\text{C}\{^1\text{H}\}$  NMR (100 MHz,  $\text{CDCl}_3$ )  $\delta$ : 171.1, 150.9, 135.4, 134.3, 132.6, 130.7, 129.7, 129.1, 128.0, 127.3, 126.2, 126.0, 125.7, 125.7, 125.0, 124.5, 120.9, 119.7, 116.5, 57.1, 55.5, 46.8, 34.7, 31.4, 31.3, 15.4, 14.5; HRMS (ESI-TOF)  $m/z$ :  $\text{C}_{31}\text{H}_{34}\text{NO}_3\text{S}$  ( $\text{M} + \text{H}$ ) $^+$  calcd for 500.2245, found 500.2247

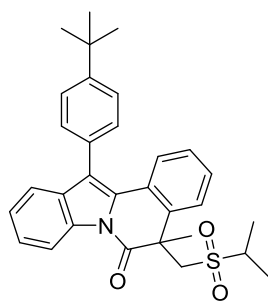

#### 5-((isopropylsulfonyl)methyl)-5-methyl-12-(p-tolyl)indolo[2,1-a]isoquinolin-6-

**(5H)-one (3ca):** Yield: 53.0 mg, 58%; yellow oil;  $^1\text{H}$  NMR (400 MHz,  $\text{CDCl}_3$ )  $\delta$ : 8.60 (d,  $J = 8.0$  Hz, 1H), 7.52 (d,  $J = 8.0$  Hz, 1H), 7.47 (d,  $J = 8.0$  Hz, 1H), 7.41-7.31 (m, 5H), 7.30-7.24 (m, 3H), 7.06 (t,  $J = 7.6$  Hz, 1H), 4.46 (d,  $J = 14.4$  Hz, 1H), 3.79 (d,  $J = 14.0$  Hz, 1H), 3.03-2.92 (m, 1H), 2.48 (s, 3H), 1.71 (s, 3H), 1.36 (d,  $J = 6.8$  Hz, 3H), 1.29 (d,  $J = 6.8$  Hz, 3H);  $^{13}\text{C}\{^1\text{H}\}$  NMR (100 MHz,  $\text{CDCl}_3$ )  $\delta$ : 171.1, 137.8, 135.4, 134.3, 132.5, 130.8, 130.0, 129.9, 129.1, 128.0, 127.3, 126.2, 125.8, 125.7, 125.0, 124.5, 120.9, 119.5, 116.5, 57.1, 55.5, 46.8, 31.3, 21.4, 15.4, 14.5; HRMS (ESI-TOF)  $m/z$ :  $\text{C}_{28}\text{H}_{28}\text{NO}_3\text{S}$  ( $\text{M} + \text{H}$ ) $^+$  calcd for 458.1784, found 458.1788.

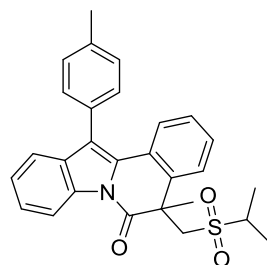

**12-(4-fluorophenyl)-5-((isopropylsulfonyl)methyl)-5-methylindolo[2,1-**

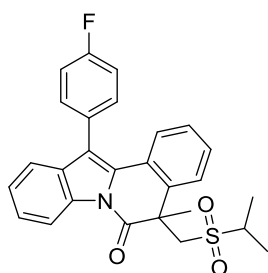

**a]isoquinolin-6-(5H)-one (3da):** Yield: 55.3 mg, 60%; white solid, mp 171.7-172.3 °C (uncorrected); <sup>1</sup>H NMR (400 MHz, CDCl<sub>3</sub>) δ: 8.61 (d, *J* = 8.0 Hz, 1H), 7.50-7.46 (m, 3H), 7.45-7.38 (m, 2H), 7.35-7.22 (m, 5H), 7.08 (t, *J* = 7.0 Hz, 1H), 4.46 (d, *J* = 14.4 Hz, 1H), 3.79 (d, *J* = 14.4 Hz, 1H), 3.03-2.92 (m, 1H), 1.71 (s, 3H), 1.36 (d, *J* = 6.8 Hz, 3H), 1.29 (d, *J* = 6.8

Hz, 3H); <sup>19</sup>F NMR (282 MHz, CDCl<sub>3</sub>) δ: -113.5 (s, 1F); <sup>13</sup>C{<sup>1</sup>H}NMR (100 MHz, CDCl<sub>3</sub>) δ: 171.1, 162.6 (d, *J* = 245.9 Hz, 1C), 135.6, 134.2, 132.3, 131.9 (d, *J* = 8.1 Hz, 1C), 129.8 (d, *J* = 3.4 Hz, 1C), 129.5, 128.2, 127.4, 126.4, 125.9, 125.5, 124.7, 124.7, 119.6, 119.3, 116.6, 116.3 (d, *J* = 21.3 Hz, 1C), 57.1, 55.6, 46.7, 31.3, 15.4, 14.5; HRMS (ESI-TOF) *m/z*: C<sub>27</sub>H<sub>25</sub>FNO<sub>3</sub>S (M + H)<sup>+</sup> calcd for 462.1534, found 462.1531.

**12-(4-chlorophenyl)-5-((isopropylsulfonyl)methyl)-5-methylindolo[2,1-**

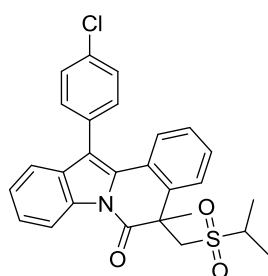

**a]isoquinolin-6-(5H)-one (3ea):** Yield: 59.1 mg, 62%; yellow solid, mp 193.8-194.3 °C (uncorrected); <sup>1</sup>H NMR (400 MHz, CDCl<sub>3</sub>) δ: 8.61 (d, *J* = 8.0 Hz, 1H), 7.55-7.44 (m, 6H), 7.43-7.38 (m, 1H), 7.36-7.31 (m, 1H), 7.29-7.24 (m, 2H), 7.10 (t, *J* = 7.6 Hz, 1H), 4.47 (d, *J* = 14.4 Hz, 1H), 3.79 (d, *J* = 14.0 Hz, 1H), 3.03-2.93 (m, 1H), 1.72 (s, 3H), 1.36 (d, *J* = 6.8 Hz, 3H), 1.30 (d, *J* = 6.8 Hz, 3H); <sup>13</sup>C{<sup>1</sup>H}NMR (100 MHz, CDCl<sub>3</sub>) δ: 171.2, 135.6, 134.3, 134.1, 132.5, 132.1, 131.7, 129.5, 129.5, 128.3, 127.5, 126.4, 126.0, 125.6, 124.7, 124.6, 119.4, 119.2, 116.7, 57.1, 55.6, 46.8, 31.4, 15.5, 14.5; HRMS (ESI-TOF) *m/z*: C<sub>27</sub>H<sub>25</sub>ClNO<sub>3</sub>S (M + H)<sup>+</sup> calcd for 478.1238, found 478.1234.

**5-((isopropylsulfonyl)methyl)-12-(3-methoxyphenyl)-5-methylindolo[2,1-**

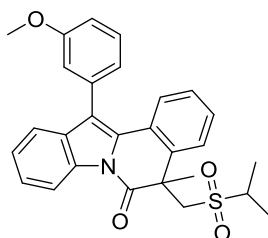

**a]isoquinolin-6-(5H)-one (3fa):** Yield: 49.2 mg, 52%; yellow oil; <sup>1</sup>H NMR (400 MHz, CDCl<sub>3</sub>) δ: 8.61 (d, *J* = 8.0 Hz, 1H), 7.53-7.43 (m, 3H), 7.42-7.37 (m, 1H), 7.34-7.25 (m, 3H), 7.10-7.02 (m, 4H), 4.46 (d, *J* = 14.0 Hz, 1H), 3.84-3.77 (m, 4H), 3.01-2.93 (m, 1H), 1.72 (s, 3H), 1.36 (d, *J* = 7.2 Hz, 3H), 1.29 (d, *J* = 6.8 Hz, 3H); <sup>13</sup>C{<sup>1</sup>H}NMR (100 MHz, CDCl<sub>3</sub>) δ: 171.2, 160.2, 135.4, 135.3, 134.2, 132.4, 130.3, 129.2, 128.1, 127.4, 126.2, 125.8, 125.8, 124.8, 124.6, 122.5, 120.6, 119.5, 116.5, 115.1, 114.0, 57.1, 55.5, 55.3, 46.8, 31.4, 15.4, 14.5; HRMS (ESI-TOF) *m/z*: C<sub>28</sub>H<sub>28</sub>NO<sub>4</sub>S (M + H)<sup>+</sup> calcd for 474.1734, found 474.1739.

**12-(3-chlorophenyl)-5-((isopropylsulfonyl)methyl)-5-methylindolo[2,1-****a]isoquinolin-6-(5H)-one(3ga):** Yield: 66.8 mg, 70%; yellow solid, mp 198.4-198.9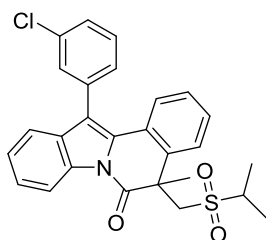<sup>1</sup>H NMR (400 MHz, CDCl<sub>3</sub>) δ: 8.61 (d, *J* = 8.0 Hz, 1H), 7.52-7.47 (m, 4H), 7.45-7.38 (m, 3H), 7.35-7.24 (m, 3H), 7.10 (t, *J* = 7.8 Hz, 1H), 4.46 (d, *J* = 14.0 Hz, 1H), 3.79 (d, *J* = 14.0 Hz, 1H), 3.03-2.92 (m, 1H), 1.72 (s, 3H), 1.36 (d, *J* = 6.8 Hz, 3H), 1.29 (d, *J* = 6.8 Hz, 3H); <sup>13</sup>C{<sup>1</sup>H}NMR (100 MHz, CDCl<sub>3</sub>) δ: 171.2, 135.9, 135.6,135.0, 134.2, 132.0, 130.5, 130.2, 129.6, 128.5, 128.4, 128.3, 127.5, 126.4, 126.0, 125.6, 124.7, 124.5, 119.2, 119.2, 116.6, 57.1, 55.6, 46.7, 31.3, 15.4, 14.5; HRMS (ESI-TOF) *m/z*: C<sub>27</sub>H<sub>25</sub>ClNO<sub>3</sub>S (M + H)<sup>+</sup> calcd for 478.1238, found 478.1234.**5-((isopropylsulfonyl)methyl)-5-methyl-12-(o-tolyl)indolo[2,1-a]isoquinolin-6-****(5H)-one(3ha):** diastereoisomer mixture: *dr* = 1:1; Yield: 53.9 mg, 59%; yellow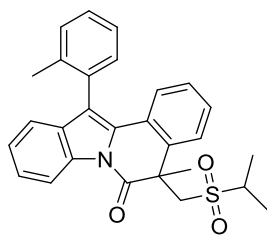oil; <sup>1</sup>H NMR (400 MHz, CDCl<sub>3</sub>) δ: 8.64-8.60 (m, 1H), 7.49-7.46 (m, 1H), 7.43-7.35 (m, 3H), 7.35-7.21 (m, 5H), 7.13 (t, *J* = 7.6 Hz, 1H), 7.05 (t, *J* = 7.0 Hz, 1H), 4.50-4.40 (m, 1H), 3.82-3.76 (m, 1H), 3.01-2.93 (m, 0.5H), 2.87-2.80 (m, 0.5H), 2.13 (s, 1.6H), 2.10 (s, 1.4H), 1.74 (s, 1.6H), 1.71 (s, 1.4H),1.37-1.28 (m, 6H); <sup>13</sup>C{<sup>1</sup>H}NMR (100 MHz, CDCl<sub>3</sub>) δ: 171.1, 171.1, 138.00, 137.1, 135.3, 135.3, 134.4, 134.4, 133.3, 133.2, 132.2, 132.0, 130.7, 130.7, 130.5, 130.2, 129.5, 129.4, 128.4, 128.3, 128.1, 128.0, 127.8, 127.7, 126.6, 126.5, 126.3, 126.2, 125.8, 125.8, 125.3, 125.2, 125.0, 124.9, 124.6, 120.6, 119.6, 119.6, 116.7, 116.5, 57.5, 57.0, 55.5, 55.3, 46.7, 46.4, 31.6, 31.3, 19.8, 19.7, 15.4, 15.1, 14.8, 14.6; HRMS (ESI-TOF) *m/z*: C<sub>28</sub>H<sub>28</sub>NO<sub>3</sub>S (M + H)<sup>+</sup> calcd for 458.1784, found 458.1788.**12-(2-chlorophenyl)-5-((isopropylsulfonyl)methyl)-5-methylindolo[2,1-****a]isoquinolin-6-(5H)-one (3ia):** diastereoisomer mixture: *dr* = 1:1; Yield: 73.5 mg,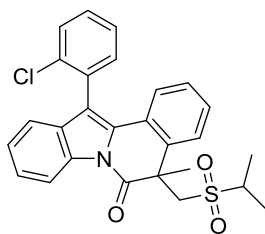77%; yellow oil; <sup>1</sup>H NMR (400 MHz, CDCl<sub>3</sub>) δ: 8.62 (d, *J* = 8.0 Hz, 1H), 7.65-7.58 (m, 1H), 7.53-7.38 (m, 5H), 7.34-7.20 (m, 3H), 7.16 (d, *J* = 7.6 Hz, 1H), 7.08 (t, *J* = 7.6 Hz, 1H), 4.49-4.39 (m, 1H), 3.79 (d, *J* = 14.0 Hz, 1H), 3.01-2.94 (m, 0.5H), 2.88-2.81 (m, 0.5H), 1.71 (s, 3H), 1.37-1.25 (m, 6H);<sup>13</sup>C{<sup>1</sup>H}NMR (100 MHz, CDCl<sub>3</sub>) δ: 171.2, 171.0, 135.6, 135.5, 135.0, 134.4, 134.3, 134.3, 133.0, 132.9, 132.5, 132.0, 131.7, 131.4, 130.4, 130.3, 130.2, 129.8, 129.7, 128.3, 128.3, 127.7, 127.6, 127.5, 127.4, 126.3, 126.2, 125.9, 125.8, 125.4, 125.1,

124.9, 124.8, 124.6, 124.6, 119.5, 119.2, 117.6, 117.1, 116.6, 57.2, 57.0, 55.5, 55.2, 46.8, 46.7, 31.6, 31.2, 15.4, 15.1, 14.8, 14.5; HRMS (ESI-TOF)  $m/z$ :  $C_{27}H_{25}ClNO_3S$  ( $M + H$ )<sup>+</sup> calcd for 478.1238, found 478.1234.

**5-((isopropylsulfonyl)methyl)-5-methyl-12-(pyridin-3-yl)indolo[2,1-a]isoquinolin-6-(5H)-one (3ja)**: Yield: 48.8 mg, 55%; yellow oil; <sup>1</sup>H NMR (400 MHz, CDCl<sub>3</sub>)  $\delta$ :

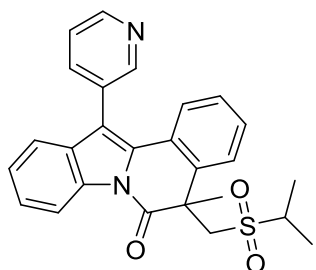

8.79-8.75 (m, 2H), 8.63 (d,  $J = 8.4$  Hz, 1H), 7.87 (d,  $J = 9.2$  Hz, 1H), 7.51 (d,  $J = 7.6$  Hz, 2H), 7.45-7.23 (m, 5H), 7.09 (t,  $J = 7.6$  Hz, 1H), 4.47 (d,  $J = 14.4$  Hz, 1H), 3.81 (d,  $J = 15.2$  Hz, 1H), 3.04-2.93 (m, 1H), 1.74 (s, 3H), 1.37 (d,  $J = 6.8$  Hz, 3H), 1.30 (d,  $J = 6.8$  Hz, 3H); <sup>13</sup>C{<sup>1</sup>H}NMR (100 MHz, CDCl<sub>3</sub>)  $\delta$ : 171.2, 151.0, 149.3, 138.0, 135.7,

134.3, 132.0, 130.3, 130.3, 128.5, 127.6, 126.6, 126.2, 125.4, 124.9, 124.5, 124.0, 119.0, 116.8, 116.7, 57.2, 55.6, 46.8, 31.3, 15.4, 14.6; HRMS (ESI-TOF)  $m/z$ :  $C_{26}H_{25}N_2O_3S$  ( $M + H$ )<sup>+</sup> calcd for 445.1580, found 445.1583.

**5-((isopropylsulfonyl)methyl)-5-methyl-12-(thiophen-2-yl)indolo[2,1-**

**a]isoquinolin-6-(5H)-one (3ka)**: Yield: 56.6 mg, 63%; black oil; <sup>1</sup>H NMR (400 MHz,

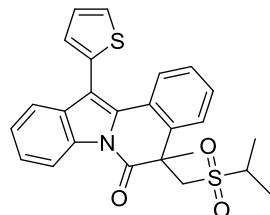

CDCl<sub>3</sub>)  $\delta$ : 8.59 (d,  $J = 8.0$  Hz, 1H), 7.63 (d,  $J = 8.0$  Hz, 1H), 7.55 (d,  $J = 5.2$  Hz, 1H), 7.49 (d,  $J = 8.0$  Hz, 1H), 7.43-7.36 (m, 2H), 7.35-7.28 (m, 2H), 7.26-7.23 (m, 1H), 7.20 (d,  $J = 3.6$  Hz, 1H), 7.14 (t,  $J = 7.8$  Hz, 1H), 4.46 (d,  $J = 14.4$  Hz, 1H), 3.80 (d,  $J = 14.0$  Hz, 1H), 3.02-2.91 (m, 1H), 1.71 (s,

3H), 1.36 (d,  $J = 6.8$  Hz, 3H), 1.30 (d,  $J = 6.8$  Hz, 3H); <sup>13</sup>C{<sup>1</sup>H}NMR (100 MHz, CDCl<sub>3</sub>)  $\delta$ : 171.2, 135.7, 134.1, 134.1, 132.8, 131.2, 128.5, 128.5, 127.9, 127.6, 127.3, 126.3, 126.0, 126.0, 124.8, 124.5, 119.5, 116.5, 113.0, 57.1, 55.6, 46.9, 31.3, 15.4, 14.6; HRMS (ESI-TOF)  $m/z$ :  $C_{25}H_{24}NO_3S_2$  ( $M + H$ )<sup>+</sup> calcd for 450.1192, found 450.1196.

**5-((isopropylsulfonyl)methyl)-10-methoxy-12-(4-methoxyphenyl)-5-**

**methylindolo[2,1-a]isoquinolin-6-(5H)-one (3la)**: Yield: 80.4 mg, 80%; yellow

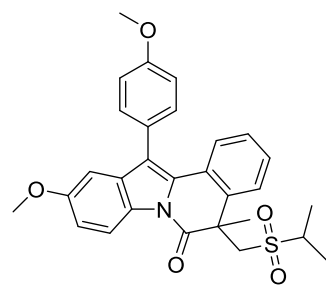

solid, mp 164.3-164.8 °C (uncorrected); <sup>1</sup>H NMR (400 MHz, CDCl<sub>3</sub>)  $\delta$ : 8.49 (d,  $J = 8.8$  Hz, 1H), 7.50-7.40 (m, 4H), 7.29 (t,  $J = 7.6$  Hz, 1H), 7.09-7.03 (m, 3H), 6.98 (d,  $J = 9.2$  Hz, 1H), 6.72 (s, 1H), 4.42 (d,  $J = 14.4$  Hz, 1H), 3.91 (s, 3H), 3.78-3.74 (m, 4H), 3.00-2.89 (m, 1H), 1.69 (s, 3H), 1.34 (d,  $J = 6.8$  Hz, 3H), 1.27 (d,  $J = 6.8$  Hz, 3H);

$^{13}\text{C}\{^1\text{H}\}$ NMR (100 MHz,  $\text{CDCl}_3$ )  $\delta$ : 170.6, 159.3, 157.3, 135.5, 133.7, 131.2, 129.9, 128.8, 127.9, 127.3, 126.3, 125.8, 125.5, 125.0, 120.3, 117.4, 114.7, 114.0, 102.2, 57.1, 55.6, 55.4, 55.2, 46.5, 31.3, 15.3, 14.5; HRMS (ESI-TOF)  $m/z$ :  $\text{C}_{29}\text{H}_{30}\text{NO}_5\text{S}$  ( $\text{M} + \text{H}$ ) $^+$  calcd for 504.1839, found 504.1842.

**5-((isopropylsulfonyl)methyl)-12-(4-methoxyphenyl)-5,10-dimethylindolo[2,1-**

**a]isoquinolin-6-(5H)-one (3ma):** Yield: 69.1 mg, 71%; yellow oil;  $^1\text{H}$  NMR (400

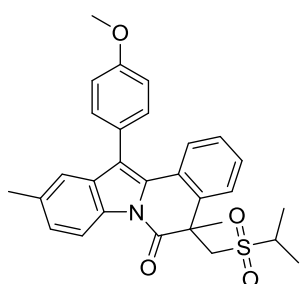

MHz,  $\text{CDCl}_3$ )  $\delta$ : 8.46 (d,  $J = 8.0$  Hz, 1H), 7.52-7.40 (m, 4H), 7.29 (t,  $J = 7.6$  Hz, 1H), 7.24-7.16 (m, 1H), 7.09-6.99 (m, 4H), 4.44 (d,  $J = 14.4$  Hz, 1H), 3.91 (s, 3H), 3.78 (d,  $J = 14.0$  Hz, 1H), 3.00-2.93 (m, 1H), 2.39 (s, 3H), 1.69 (s, 3H), 1.35 (d,  $J = 6.8$  Hz, 3H), 1.28 (d,  $J = 6.8$  Hz, 3H);  $^{13}\text{C}\{^1\text{H}\}$ NMR (100 MHz,  $\text{CDCl}_3$ )  $\delta$ : 170.8, 159.3, 135.4,

134.2, 132.8, 132.4, 131.3, 129.3, 127.9, 127.3, 127.0, 126.2, 126.0, 125.5, 125.1, 120.4, 119.4, 116.2, 114.6, 57.0, 55.4, 55.3, 46.6, 31.3, 21.4, 15.4, 14.5; HRMS (ESI-TOF)  $m/z$ :  $\text{C}_{29}\text{H}_{30}\text{NO}_4\text{S}$  ( $\text{M} + \text{H}$ ) $^+$  calcd for 488.1890, found 488.1894.

**10-(tert-butyl)-5-((isopropylsulfonyl)methyl)-12-(4-methoxyphenyl)-5-**

**methylindolo[2,1-a]isoquinolin-6-(5H)-one (3na):** Yield: 79.2 mg, 75%; yellow

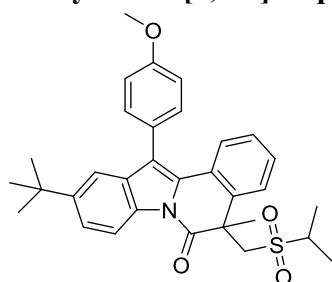

solid, mp 179.8-180.3  $^{\circ}\text{C}$  (uncorrected);  $^1\text{H}$  NMR (400 MHz,  $\text{CDCl}_3$ )  $\delta$ : 8.52 (d,  $J = 8.4$  Hz, 1H), 7.51-7.42 (m, 5H), 7.31-7.27 (m, 2H), 7.10-7.03 (m, 3H), 4.44 (d,  $J = 14.4$  Hz, 1H), 3.92 (s, 3H), 3.77 (d,  $J = 14.4$  Hz, 1H), 3.00-2.92 (m, 1H), 1.69 (s, 3H), 1.36-1.32 (m, 12H), 1.28 (d,  $J = 6.8$  Hz, 3H);  $^{13}\text{C}\{^1\text{H}\}$ NMR (100 MHz,  $\text{CDCl}_3$ )  $\delta$ :

170.8, 159.3, 147.8, 135.4, 132.4, 132.3, 131.3, 129.3, 127.8, 127.2, 126.2, 126.0, 125.5, 125.1, 123.7, 120.8, 116.0, 115.5, 114.6, 57.1, 55.4, 55.2, 46.6, 34.8, 31.6, 31.2, 15.4, 14.5; HRMS (ESI-TOF)  $m/z$ :  $\text{C}_{32}\text{H}_{36}\text{NO}_4\text{S}$  ( $\text{M} + \text{H}$ ) $^+$  calcd for 530.2360, found 530.2365.

**10-fluoro-5-((isopropylsulfonyl)methyl)-12-(4-methoxyphenyl)-5-**

**methylindolo[2,1-a]isoquinolin-6-(5H)-one (3oa):** Yield: 49.9 mg, 51%; yellow oil;

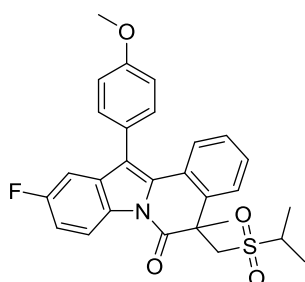

$^1\text{H}$  NMR (400 MHz,  $\text{CDCl}_3$ )  $\delta$ : 8.57-8.53 (m, 1H), 7.53 (d,  $J = 8.0$  Hz, 1H), 7.48 (d,  $J = 8.0$  Hz, 1H), 7.40 (d,  $J = 8.0$  Hz, 2H), 7.33 (t,  $J = 7.6$  Hz, 1H), 7.09 (t,  $J = 7.6$  Hz, 4H), 6.96-6.92 (m, 1H), 4.44 (d,  $J = 14.4$  Hz, 1H), 3.92 (s, 3H), 3.79 (d,  $J = 14.0$  Hz, 1H), 3.00-2.92 (m, 1H), 1.72 (s, 3H),

1.36 (d,  $J = 6.8$  Hz, 3H), 1.30 (d,  $J = 6.8$  Hz, 3H);  $^{19}\text{F}$  NMR (282 MHz,  $\text{CDCl}_3$ )  $\delta$ : -117.7 (s, 1F);  $^{13}\text{C}\{^1\text{H}\}$  NMR (100 MHz,  $\text{CDCl}_3$ )  $\delta$ : 171.0, 160.5 (d,  $J = 240.0$  Hz, 1C), 159.5, 135.5, 134.0 (d,  $J = 9.5$  Hz, 1C), 131.2, 130.7, 130.5, 128.3, 127.4, 126.3, 125.7, 125.3, 124.7, 120.1 (d,  $J = 4.0$  Hz, 1C), 117.7 (d,  $J = 9.0$  Hz, 1C), 114.8, 113.2 (d,  $J = 24.4$  Hz, 1C), 105.2 (d,  $J = 24.3$  Hz, 1C), 57.1, 55.5, 55.3, 46.6, 31.3, 15.4, 14.6; HRMS (ESI-TOF)  $m/z$ :  $\text{C}_{28}\text{H}_{27}\text{FNO}_4\text{S}$  ( $\text{M} + \text{H}$ ) $^+$  calcd for 492.1639, found 492.1636.

**10-chloro-5-((isopropylsulfonyl)methyl)-12-(4-methoxyphenyl)-5-methylindolo[2,1-a]isoquinolin-6-(5H)-one (3pa):**

Yield: 56.7 mg, 56%; yellow solid, mp 203.2-203.7 °C (uncorrected);  $^1\text{H}$  NMR (400 MHz,  $\text{CDCl}_3$ )  $\delta$ : 8.52 (d,  $J = 8.8$  Hz, 1H), 7.53 (d,  $J = 8.4$  Hz, 1H), 7.48 (d,  $J = 8.0$  Hz, 1H), 7.40 (d,  $J = 8.0$  Hz, 2H), 7.36-7.31 (m, 2H), 7.24 (d,  $J = 2.0$  Hz, 1H), 7.12-7.07 (m, 3H), 4.44 (d,  $J = 14.0$  Hz, 1H), 3.93 (s, 3H), 3.79 (d,  $J = 14.0$  Hz, 1H), 3.02-2.91 (m, 1H), 1.72 (s, 3H), 1.36 (d,  $J = 6.8$  Hz, 3H), 1.30 (d,  $J = 6.8$  Hz, 3H);  $^{13}\text{C}\{^1\text{H}\}$  NMR (100 MHz,  $\text{CDCl}_3$ )  $\delta$ : 13C NMR (101 MHz,  $\text{CDCl}_3$ )  $\delta$  171.1, 159.6, 135.5, 134.1, 132.6, 131.3, 130.5, 130.3, 128.4, 127.5, 126.4, 125.8, 125.8, 125.2, 124.7, 119.7, 119.1, 117.6, 114.8, 57.2, 55.6, 55.4, 46.6, 31.3, 15.4, 14.6; HRMS (ESI-TOF)  $m/z$ :  $\text{C}_{28}\text{H}_{27}\text{ClNO}_4\text{S}$  ( $\text{M} + \text{H}$ ) $^+$  calcd for 508.1344, found 508.1340.

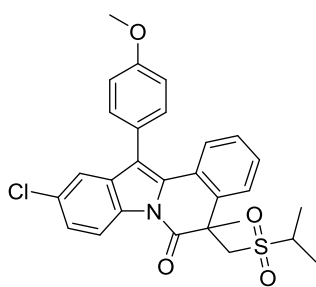

5-((isopropylsulfonyl)methyl)-12-(4-methoxyphenyl)-5-methyl-10-phenylindolo[2,1-a]isoquinolin-6-(5H)-one (3qa):

**5-((isopropylsulfonyl)methyl)-12-(4-methoxyphenyl)-5-methyl-10-phenylindolo[2,1-a]isoquinolin-6-(5H)-one (3qa):**

Yield: 81.3 mg, 74%; yellow solid, mp 189.4-189.9 °C(uncorrected);  $^1\text{H}$  NMR (400 MHz,  $\text{CDCl}_3$ )  $\delta$ : 8.67 (d,  $J = 8.0$  Hz, 1H), 7.63 (d,  $J = 8.4$  Hz, 1H), 7.59-7.53 (m, 3H), 7.48-7.45 (m, 4H), 7.39 (t,  $J = 7.6$  Hz, 2H), 7.29 (t,  $J = 7.2$  Hz, 2H), 7.07 (t,  $J = 7.6$  Hz, 3H), 4.44 (d,  $J = 14.4$  Hz, 1H), 3.90 (s, 3H), 3.78 (d,  $J = 14.4$  Hz, 1H), 2.98-2.90 (m, 1H), 1.70 (s, 3H), 1.34 (d,  $J = 6.8$  Hz, 3H), 1.28 (d,  $J = 6.8$  Hz, 3H);  $^{13}\text{C}\{^1\text{H}\}$  NMR (100 MHz,  $\text{CDCl}_3$ )  $\delta$ : 171.0, 159.4, 141.4, 138.0, 135.4, 133.6, 133.2, 131.3, 129.8, 128.6, 128.0, 127.3, 127.3, 126.9, 126.3, 125.7, 125.6, 125.2, 124.9, 120.6, 117.8, 116.7, 114.7, 57.1, 55.4, 55.2, 46.6, 31.2, 15.3, 14.5; HRMS (ESI-TOF)  $m/z$ :  $\text{C}_{34}\text{H}_{32}\text{NO}_4\text{S}$  ( $\text{M} + \text{H}$ ) $^+$  calcd for 550.2047, found 550.2051.

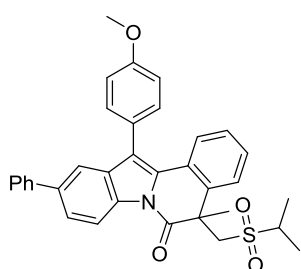

**5-((isopropylsulfonyl)methyl)-12-(4-methoxyphenyl)-5,9-dimethylindolo[2,1-a]isoquinolin-6-(5H)-one(3ra) and**

**5-((isopropylsulfonyl)methyl)-12-(4-methoxyphenyl)-5,11-dimethylindolo[2,1-a]isoquinolin-6-(5H)-one (3ra') mixture: 3ra : 3ra' = 3:1; Yield: 65.3 mg, 67%;**

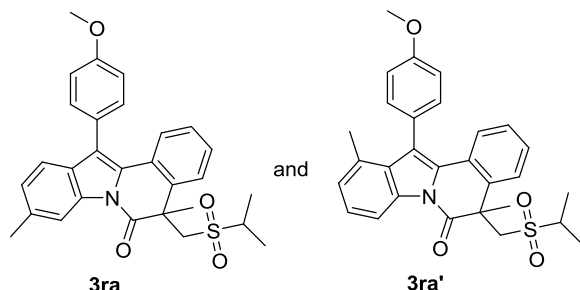

yellow oil; <sup>1</sup>H NMR (400 MHz, CDCl<sub>3</sub>) δ: 8.54 (d, *J* = 8.0 Hz, 0.75H), 8.44 (s, 0.25H), 7.52-7.40 (m, 2H), 7.33-7.24 (m, 3H), 7.18 (t, *J* = 7.2 Hz, 1H), 7.12-6.99 (m, 4H), 4.48-4.43 (m, 1H), 3.93 (s, 2H), 3.92 (s, 1H), 3.81-

3.75 (m, 1H), 3.02-2.93 (m, 1H), 2.51 (s, 0.75H), 1.97 (s, 2.25H), 1.70 (d, *J* = 8.4 Hz, 3H), 1.38-1.34 (m, 3H), 1.31-1.28 (m, 3H); <sup>13</sup>C{<sup>1</sup>H}NMR (100 MHz, CDCl<sub>3</sub>) δ: 171.1, 171.1, 159.4, 159.3, 136.1, 135.3, 135.2, 134.6, 134.5, 131.9, 131.5, 131.3, 131.2, 130.5, 129.9, 129.6, 128.3, 127.8, 127.4, 127.3, 126.7, 126.2, 126.1, 125.9, 125.5, 125.5, 125.2, 125.2, 121.4, 120.7, 119.2, 116.8, 114.6, 114.6, 114.5, 114.4, 57.2, 57.1, 55.5, 55.3, 55.3, 46.7, 31.5, 31.4, 19.9, 15.5, 15.5, 14.6; HRMS (ESI-TOF) *m/z*: C<sub>29</sub>H<sub>30</sub>NO<sub>4</sub>S (M + H)<sup>+</sup> calcd for 488.1890, found 488.1894.

**5-((isopropylsulfonyl)methyl)-12-(4-methoxyphenyl)-5,8-dimethylindolo[2,1-a]isoquinolin-6-(5H)-one (3sa): Yield: 56.5 mg, 58%; yellow oil; <sup>1</sup>H NMR (400**

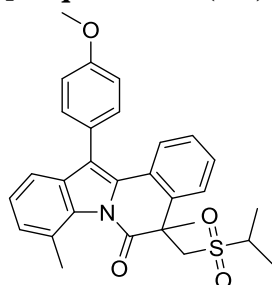

MHz, CDCl<sub>3</sub>) δ: 7.46-7.37 (m, 4H), 7.27 (t, *J* = 7.8 Hz, 1H), 7.22-7.14 (m, 3H), 7.07-7.03 (m, 3H), 4.39 (d, *J* = 14.0 Hz, 1H), 3.91 (s, 3H), 3.72 (d, *J* = 14.0 Hz, 1H), 2.97-2.86 (m, 1H), 2.63 (s, 3H), 1.79 (s, 3H), 1.34 (d, *J* = 6.8 Hz, 3H), 1.27 (d, *J* = 6.4 Hz, 3H); <sup>13</sup>C{<sup>1</sup>H}NMR (100 MHz, CDCl<sub>3</sub>) δ: 170.8, 159.3, 135.6, 134.6, 134.3, 131.6, 131.4, 128.8, 127.9,

127.3, 126.9, 126.3, 126.2, 125.9, 125.8, 124.9, 120.9, 117.3, 114.6, 57.3, 55.4, 55.3, 47.1, 30.9, 22.3, 15.4, 14.6; HRMS (ESI-TOF) *m/z*: C<sub>29</sub>H<sub>30</sub>NO<sub>4</sub>S (M + H)<sup>+</sup> calcd for 488.1890, found 488.1894.

**5-((isopropylsulfonyl)methyl)-12-(4-methoxyphenyl)-5-phenylindolo[2,1-**

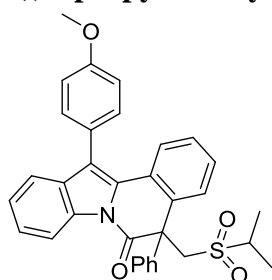

**a]isoquinolin-6-(5H)-one (3ta): Yield: 64.1 mg, 60%; yellow solid; mp 168.5-169.0 °C (uncorrected); <sup>1</sup>H NMR (400 MHz, CDCl<sub>3</sub>) δ: 8.49 (d, *J* = 8.0 Hz, 1H), 7.58 (d, *J* = 8.0 Hz, 1H), 7.42 (d, *J* = 7.6 Hz, 3H), 7.34-7.12 (m, 10H), 7.08 (d, *J* = 8.0 Hz, 2H), 5.01 (d, *J* = 14.0 Hz, 1H), 4.09 (d, *J***



= 14.0 Hz, 1H), 3.92 (s, 3H), 3.22-3.15 (m, 1H), 1.43 (d,  $J = 6.4$  Hz, 3H), 1.35 (d,  $J = 6.4$  Hz, 3H);  $^{13}\text{C}\{^1\text{H}\}$ NMR (100 MHz,  $\text{CDCl}_3$ )  $\delta$ : 169.0, 159.4, 141.1, 134.5, 134.1, 132.5, 131.3, 129.3, 129.0, 129.0, 128.5, 128.1, 128.0, 127.8, 126.7, 126.6, 125.8, 125.7, 124.5, 120.9, 119.5, 116.4, 114.6, 56.8, 56.1, 55.3, 54.7, 15.7, 14.5; HRMS (ESI-TOF)  $m/z$ :  $\text{C}_{33}\text{H}_{30}\text{NO}_4\text{S}(\text{M} + \text{H})^+$  calcd for 536.1890, found 536.1895.

**5-((ethylsulfonyl)methyl)-12-(4-methoxyphenyl)-5-methylindolo[2,1-**

**a]isoquinolin-6-(5H)-one(3ab):** Yield: 55.0 mg, 60%; yellow oil;  $^1\text{H}$  NMR (400

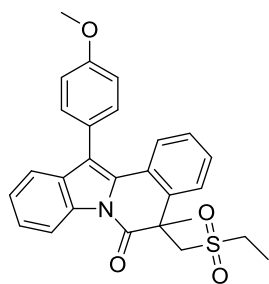

MHz,  $\text{CDCl}_3$ )  $\delta$ : 8.61 (d,  $J = 8.0$  Hz, 1H), 7.54 (d,  $J = 8.0$  Hz, 1H), 7.47-7.38 (m, 4H), 7.34-7.28 (m, 3H), 7.09 (t,  $J = 7.0$  Hz, 3H), 4.42 (d,  $J = 14.8$  Hz, 1H), 3.93 (s, 3H), 3.84 (d,  $J = 14.8$  Hz, 1H), 2.90-2.76 (m, 2H), 1.73 (s, 3H), 1.31 (t,  $J = 7.4$  Hz, 3H);  $^{13}\text{C}\{^1\text{H}\}$ NMR (100 MHz,  $\text{CDCl}_3$ )  $\delta$ : 171.0, 159.4, 135.5, 134.3, 132.6, 131.3, 129.1, 128.2, 127.4, 125.9, 125.9, 125.8,

125.8, 125.2, 124.7, 120.8, 119.6, 116.6, 114.7, 59.8, 55.3, 50.4, 46.9, 31.2, 6.4; HRMS (ESI-TOF)  $m/z$ :  $\text{C}_{27}\text{H}_{26}\text{NO}_4\text{S}(\text{M} + \text{H})^+$  calcd for 460.1577, found 460.1579.

**12-(4-methoxyphenyl)-5-methyl-5-((propylsulfonyl)methyl)indolo[2,1-**

**a]isoquinolin-6-(5H)-one (3ac):** Yield: 54.8 mg, 58%; yellow oil;  $^1\text{H}$  NMR (400

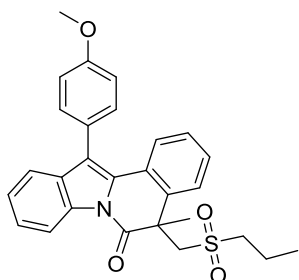

MHz,  $\text{CDCl}_3$ )  $\delta$ : 8.61 (d,  $J = 8.4$  Hz, 1H), 7.53 (d,  $J = 8.0$  Hz, 1H), 7.47-7.38 (m, 4H), 7.34-7.28 (m, 3H), 7.09 (t,  $J = 7.8$  Hz, 3H), 4.40 (d,  $J = 14.4$  Hz, 1H), 3.93 (s, 3H), 3.83 (d,  $J = 14.4$  Hz, 1H), 2.83-2.68 (m, 2H), 1.82-1.72 (m, 5H), 0.97 (t,  $J = 7.4$  Hz, 3H);  $^{13}\text{C}\{^1\text{H}\}$ NMR (100 MHz,  $\text{CDCl}_3$ )  $\delta$ : 171.0, 159.4, 135.4, 134.3, 132.6, 131.3, 129.1, 128.2,

127.4, 126.0, 126.0, 125.8, 125.8, 125.3, 124.7, 120.8, 119.6, 116.6, 114.7, 60.6, 57.7, 55.3, 46.9, 31.1, 15.6, 13.0; HRMS (ESI-TOF)  $m/z$ :  $\text{C}_{28}\text{H}_{28}\text{NO}_4\text{S}(\text{M} + \text{H})^+$  calcd for 474.1734, found 474.1737.

**5-((butylsulfonyl)methyl)-12-(4-methoxyphenyl)-5-methylindolo[2,1-**

**a]isoquinolin-6-(5H)-one(3ad):** Yield: 54.5 mg, 56%; yellow oil;  $^1\text{H}$  NMR (400 MHz,

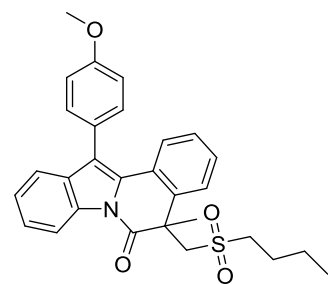

$\text{CDCl}_3$ )  $\delta$ : 8.61 (d,  $J = 8.0$  Hz, 1H), 7.54 (d,  $J = 8.4$  Hz, 1H), 7.47-7.38 (m, 4H), 7.33-7.28 (m, 3H), 7.09 (t,  $J = 7.2$  Hz, 3H), 4.39 (d,  $J = 14.4$  Hz, 1H), 3.92 (s, 3H), 3.83 (d,  $J = 14.0$  Hz, 1H), 2.83-2.68 (m, 2H), 1.76-1.67 (m, 5H), 1.40-1.32 (m, 2H), 0.88 (t,  $J = 7.2$  Hz, 3H);  $^{13}\text{C}\{^1\text{H}\}$ NMR (100 MHz,  $\text{CDCl}_3$ )  $\delta$ : 170.9, 159.4, 135.4,

134.3, 132.6, 131.3, 129.0, 128.1, 127.4, 126.0, 125.9, 125.8, 125.8, 125.3, 124.6, 120.8, 119.6, 116.6, 114.7, 60.7, 55.7, 55.3, 46.9, 31.1, 23.6, 21.5, 13.5; HRMS (ESI-TOF)  $m/z$ :  $C_{29}H_{30}NO_4S$  ( $M + H$ )<sup>+</sup> calcd for 488.1890, found 488.1886.

**12-(4-methoxyphenyl)-5-methyl-5-((pentylsulfonyl)methyl)indolo[2,1-**

**a]isoquinolin-6-(5H)-one (3ae):** Yield: 57.1 mg, 57%; yellow oil; <sup>1</sup>H NMR (400

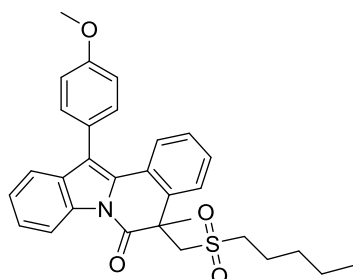

MHz, CDCl<sub>3</sub>)  $\delta$ : 8.61 (d,  $J = 8.4$  Hz, 1H), 7.53 (d,  $J = 8.0$  Hz, 1H), 7.46-7.37 (m, 4H), 7.32-7.28 (m, 3H), 7.08 (t,  $J = 6.2$  Hz, 3H), 4.38 (d,  $J = 14.8$  Hz, 1H), 3.91 (s, 3H), 3.83 (d,  $J = 15.2$  Hz, 1H), 2.81-2.67 (m, 2H), 1.75-1.67 (m, 5H), 1.31-1.25 (m, 4H), 0.86 (t,  $J = 6.4$  Hz, 3H); <sup>13</sup>C{<sup>1</sup>H}NMR (100 MHz, CDCl<sub>3</sub>)  $\delta$ : 170.9, 159.4,

135.4, 134.3, 132.6, 131.3, 129.0, 128.1, 127.4, 126.0, 125.9, 125.8, 125.7, 125.3, 124.6, 120.8, 119.5, 116.6, 114.7, 60.7, 55.9, 55.3, 46.9, 31.0, 30.3, 22.0, 21.3, 13.7; HRMS (ESI-TOF)  $m/z$ :  $C_{30}H_{32}NO_4S$  ( $M + H$ )<sup>+</sup> calcd for 502.2047, found 502.2050.

**5-((hexylsulfonyl)methyl)-12-(4-methoxyphenyl)-5-methylindolo[2,1-**

**a]isoquinolin-6-(5H)-one (3af):** Yield: 56.7 mg, 55%; yellow oil; <sup>1</sup>H NMR (400

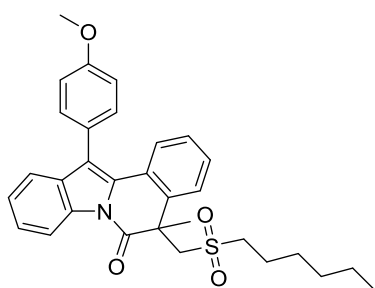

MHz, CDCl<sub>3</sub>)  $\delta$ : 8.61 (d,  $J = 8.0$  Hz, 1H), 7.53 (d,  $J = 8.0$  Hz, 1H), 7.47-7.38 (m, 4H), 7.33-7.27 (m, 3H), 7.09 (t,  $J = 6.6$  Hz, 3H), 4.39 (d,  $J = 14.4$  Hz, 1H), 3.93 (s, 3H), 3.83 (d,  $J = 14.4$  Hz, 1H), 2.82-2.68 (m, 2H), 1.77-1.68 (m, 5H), 1.33-1.22 (m, 6H), 0.86 (t,  $J = 6.8$  Hz, 3H); <sup>13</sup>C{<sup>1</sup>H}NMR (100 MHz, CDCl<sub>3</sub>)  $\delta$ : 170.9,

159.4, 135.4, 134.3, 132.6, 131.3, 129.1, 128.1, 127.4, 126.0, 126.0, 125.8, 125.8, 125.3, 124.7, 120.8, 119.6, 116.6, 114.7, 60.7, 56.0, 55.3, 46.9, 31.1, 31.1, 27.9, 22.3, 21.6, 13.9; HRMS (ESI-TOF)  $m/z$ :  $C_{31}H_{34}NO_4S$  ( $M + H$ )<sup>+</sup> calcd for 516.2203, found 516.2207.

**12-(4-methoxyphenyl)-5-methyl-5-((phenethylsulfonyl)methyl)indolo[2,1-**

**a]isoquinolin-6-(5H)-one(3ag):** Yield: 53.4 mg, 50%; yellow oil; <sup>1</sup>H NMR (400

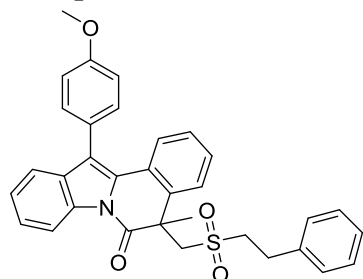

MHz, CDCl<sub>3</sub>)  $\delta$ : 8.61 (d,  $J = 8.0$  Hz, 1H), 7.54 (d,  $J = 8.4$  Hz, 1H), 7.44-7.38 (m, 4H), 7.34-7.28 (m, 5H), 7.24-7.20 (m, 2H), 7.15 (d,  $J = 7.2$  Hz, 2H), 7.09 (t,  $J = 7.6$  Hz, 2H), 4.37 (d,  $J = 14.8$  Hz, 1H), 3.93 (s, 3H), 3.83-3.76 (m, 2H), 3.05 (d,  $J = 6.4$  Hz, 3H), 1.71 (s, 3H); <sup>13</sup>C{<sup>1</sup>H}NMR (100 MHz, CDCl<sub>3</sub>)  $\delta$ : 170.9, 159.4,

137.5, 135.4, 134.3, 133.1, 132.6, 131.3, 129.0, 128.8, 128.7, 128.5, 128.2, 127.5, 126.9, 126.0, 125.8, 125.3, 124.7, 120.9, 119.6, 116.6, 114.7, 61.1, 57.3, 55.3, 47.0, 31.0, 27.8; HRMS (ESI-TOF)  $m/z$ :  $C_{33}H_{30}NO_4S$  ( $M + H$ )<sup>+</sup> calcd for 536.1890, found 536.1894.

**5-((sec-butylsulfonyl)methyl)-12-(4-methoxyphenyl)-5-methylindolo[2,1-**

**a]isoquinolin-6-(5H)-one (3ah):** diastereoisomer mixture:  $dr = 1:1$ ; Yield: 67.2 mg,

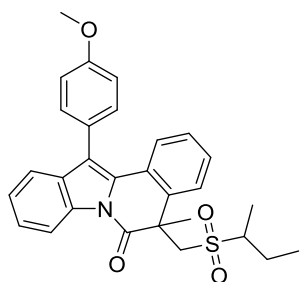

69%; yellow oil; <sup>1</sup>H NMR (400 MHz, CDCl<sub>3</sub>)  $\delta$ : 8.61 (d,  $J = 8.0$  Hz, 1H), 7.53 (d,  $J = 8.4$  Hz, 1H), 7.49-7.38 (m, 4H), 7.34-7.29 (m, 3H), 7.08 (d,  $J = 6.4$  Hz, 3H), 4.46 (d,  $J = 14.4$  Hz, 1H), 3.93 (s, 1.5H), 3.92 (s, 1.5H), 3.80 (d,  $J = 14.0$  Hz, 1H), 2.74-2.70 (m, 1H), 2.03-2.01 (m, 1H), 1.72 (s, 3H), 1.57-1.42 (m, 1H), 1.36 (d,  $J = 6.8$  Hz, 1.4H), 1.29 (d,  $J =$

6.8 Hz, 1.6H), 1.02-0.94 (m, 3H); <sup>13</sup>C{<sup>1</sup>H}NMR (100 MHz, CDCl<sub>3</sub>)  $\delta$ : 171.1, 171.1, 159.3, 135.3, 135.3, 134.2, 132.6, 131.3, 129.2, 128.0, 127.9, 127.3, 126.3, 126.3, 125.8, 125.8, 125.6, 125.0, 125.0, 124.5, 120.5, 119.5, 116.5, 114.6, 61.4, 57.4, 57.3, 55.3, 46.7, 46.7, 31.3, 31.3, 22.2, 21.3, 12.2, 11.4, 11.1, 10.9; HRMS (ESI-TOF)  $m/z$ :  $C_{29}H_{30}NO_4S$  ( $M + H$ )<sup>+</sup> calcd for 488.1890, found 488.1887.

**5-((heptan-3-ylsulfonyl)methyl)-12-(4-methoxyphenyl)-5-methylindolo[2,1-**

**a]isoquinolin-6-(5H)-one (3ai):** diastereoisomer mixture:  $dr = 1:1$ ; Yield: 78.1 mg,

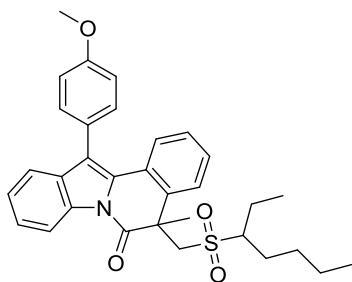

74%; yellow oil; <sup>1</sup>H NMR (400 MHz, CDCl<sub>3</sub>)  $\delta$ : 8.61 (d,  $J = 8.0$  Hz, 1H), 7.53 (d,  $J = 8.4$  Hz, 1H), 7.48-7.37 (m, 4H), 7.32-7.28 (m, 3H), 7.07 (d,  $J = 6.4$  Hz, 3H), 4.45-4.40 (m, 1H), 3.92 (s, 3H), 3.84-3.75 (m, 1H), 2.63-2.56 (m, 1H), 1.97-1.82 (m, 2H), 1.76-1.60 (m, 5H), 1.38-1.24 (m, 4H), 1.04-0.95 (m, 3H), 0.92-0.85 (m, 3H);

<sup>13</sup>C{<sup>1</sup>H}NMR (100 MHz, CDCl<sub>3</sub>)  $\delta$ : 171.1, 159.4, 135.4, 135.4, 134.3, 132.7, 131.3, 129.2, 128.0, 128.0, 127.3, 127.3, 126.3, 126.3, 125.9, 125.8, 125.6, 125.1, 125.1, 124.5, 120.6, 119.5, 116.6, 114.6, 65.9, 65.7, 58.6, 55.3, 46.8, 46.7, 31.3, 29.0, 28.7, 26.5, 26.1, 22.7, 21.0, 20.7, 14.2, 13.8, 11.3, 11.0; HRMS (ESI-TOF)  $m/z$ :  $C_{32}H_{36}NO_4S$  ( $M + H$ )<sup>+</sup> calcd for 530.2360, found 530.2358.

**5-(((1-(benzo[d][1,3]dioxol-5-yl)propan-2-yl)sulfonyl)methyl)-12-(4-methoxyphenyl)-5-methylindolo[2,1-a]isoquinolin-6-(5H)-one (3aj):**

diastereoisomer mixture:  $dr = 3:2$ ; Yield: 73.4 mg, 62%; yellow oil; <sup>1</sup>H NMR (400 MHz, CDCl<sub>3</sub>)  $\delta$ : 8.62 (d,  $J = 8.4$  Hz, 1H), 7.57-7.53 (m, 1H), 7.49-7.37 (m, 4H), 7.35-

7.27 (m, 3H), 7.09 (t,  $J = 8.0$  Hz, 3H), 6.74 (t,  $J = 8.2$  Hz, 1H), 6.62-6.56 (m, 2H), 5.94 (d,  $J = 4.4$  Hz, 2H), 4.48 (d,  $J = 14.4$  Hz, 0.6H), 4.41 (d,  $J = 14.4$  Hz, 0.4H), 3.92

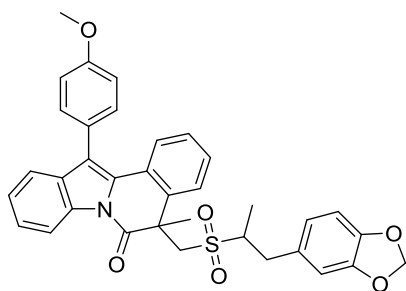

(s, 3H), 3.85-3.77 (m, 1H), 3.32-3.23 (m, 1H), 3.08-3.02 (m, 0.6H), 2.94-2.88 (m, 0.4H), 2.57-2.50 (m, 0.4H), 2.47-2.40 (m, 0.6H), 1.72 (d,  $J = 2.8$  Hz, 3H), 1.28-1.23 (m, 3H);  $^{13}\text{C}\{^1\text{H}\}$ NMR (100 MHz,  $\text{CDCl}_3$ )  $\delta$ : 171.1, 171.0, 159.4, 147.9, 147.8, 146.5, 146.5, 135.4, 135.4, 134.3, 133.0, 133.0, 132.7,

132.6, 131.3, 130.5, 130.4, 129.2, 129.2, 128.1, 128.0, 127.4, 127.4, 126.2, 125.9, 125.7, 125.2, 125.1, 124.6, 124.6, 122.4, 122.3, 120.7, 120.7, 120.6, 119.6, 119.5, 116.6, 116.6, 114.7, 114.1, 114.1, 109.4, 109.3, 108.4, 108.4, 101.0, 101.0, 61.8, 61.5, 58.2, 58.0, 55.3, 46.9, 46.7, 34.8, 33.6, 31.3, 31.2, 12.5, 12.0; HRMS (ESI-TOF)  $m/z$ :  $\text{C}_{35}\text{H}_{32}\text{NO}_6\text{S}$  ( $\text{M} + \text{H}$ ) $^+$  calcd for 594.1945, found 594.1947.

#### 5-((cyclopentylsulfonyl)methyl)-12-(4-methoxyphenyl)-5-methylindolo[2,1-

**a]isoquinolin-6-(5H)-one(3ak):** Yield: 67.8 mg, 68%; yellow solid, mp 171.2-171.7 °C (uncorrected);  $^1\text{H}$  NMR (400 MHz,  $\text{CDCl}_3$ )  $\delta$ : 8.61 (d,  $J = 8.4$  Hz, 1H), 7.53 (d,  $J =$

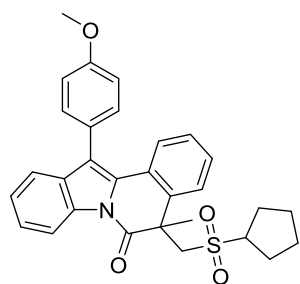

6.8 Hz, 1H), 7.47 (d,  $J = 6.8$  Hz, 1H), 7.44-7.37 (m, 3H), 7.33-7.27 (m, 3H), 7.10-7.05 (m, 3H), 4.41 (d,  $J = 14.4$  Hz, 1H), 3.92 (s, 3H), 3.84 (d,  $J = 14.4$  Hz, 1H), 3.29-3.20 (m, 1H), 2.03-1.84 (m, 4H), 1.76-1.70 (m, 5H), 1.64-1.56 (m, 2H);  $^{13}\text{C}\{^1\text{H}\}$ NMR (100 MHz,  $\text{CDCl}_3$ )  $\delta$ : 171.1, 159.4, 135.4, 134.2, 132.6, 131.3, 129.2, 128.0, 127.3, 126.3, 125.9,

125.8, 125.6, 125.0, 124.5, 120.6, 119.5, 116.6, 114.6, 63.8, 59.4, 55.3, 46.8, 31.3, 26.7, 26.3, 26.0, 26.0; HRMS (ESI-TOF)  $m/z$ :  $\text{C}_{30}\text{H}_{30}\text{NO}_4\text{S}$  ( $\text{M} + \text{H}$ ) $^+$  calcd for 500.1890, found 500.1894.

#### 5-((cyclohexylsulfonyl)methyl)-12-(4-methoxyphenyl)-5-methylindolo[2,1-

**a]isoquinolin-6-(5H)-one (3al):** Yield: 64.6 mg, 63%; yellow solid, mp 176.8-177.3 °C (uncorrected);  $^1\text{H}$  NMR (400 MHz,  $\text{CDCl}_3$ )  $\delta$ : 8.61 (d,  $J =$

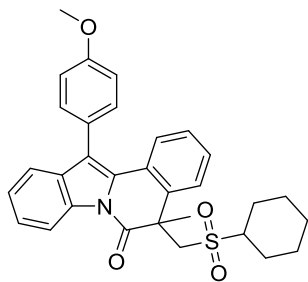

8.0 Hz, 1H), 7.53 (d,  $J = 8.0$  Hz, 1H), 7.48 (d,  $J = 8.0$  Hz, 1H), 7.44-7.37 (m, 3H), 7.33-7.27 (m, 3H), 7.09 (t,  $J = 7.8$  Hz, 3H), 4.43 (d,  $J = 14.4$  Hz, 1H), 3.93 (s, 3H), 3.75 (d,  $J = 14.0$  Hz, 1H), 2.65-2.57 (m, 1H), 2.11-2.08 (m, 2H), 1.92-1.85 (m, 2H), 1.58 (s, 3H), 1.52-1.38 (m, 2H), 1.30-

1.14 (m, 4H);  $^{13}\text{C}\{^1\text{H}\}$ NMR (100 MHz,  $\text{CDCl}_3$ )  $\delta$ : 171.1, 159.4, 135.3, 134.3, 132.7,

131.3, 128.8, 128.0, 127.4, 126.4, 125.9, 125.8, 125.7, 125.1, 124.6, 120.6, 119.5, 116.6, 114.6, 63.3, 57.3, 55.3, 46.6, 25.1, 25.0, 25.0, 24.9, 24.2, 14.2; HRMS (ESI-TOF)  $m/z$ :  $C_{31}H_{32}NO_4S(M + H)^+$  calcd for 514.2047, found 514.2051.

**5-((cyclohex-3-en-1-ylsulfonyl)methyl)-12-(4-methoxyphenyl)-5-**

**methylindolo[2,1-a]isoquinolin-6-(5H)-one (3am):** diastereoisomer mixture:  $dr =$

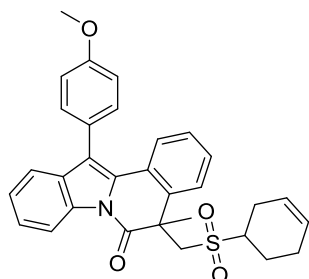

3:2; Yield: 68.5 mg, 67%; yellow oil;  $^1H$  NMR (400 MHz,  $CDCl_3$ )  $\delta$ : 8.63-8.59 (m, 1H), 7.53 (d,  $J = 8.0$  Hz, 1H), 7.48 (d,  $J = 8.0$  Hz, 1H), 7.44-7.37 (m, 3H), 7.33-7.27 (m, 3H), 7.10-7.06 (m, 3H), 5.68 (d,  $J = 2.8$  Hz, 2H), 4.46 (t,  $J = 13.8$  Hz, 1H), 3.92 (s, 3H), 3.81 (t,  $J = 7.2$  Hz, 0.6H), 3.77 (d,  $J = 2.8$  Hz, 0.4H), 3.00-2.87 (m, 1H), 2.40-2.00 (m, 6H),

1.72 (s, 3H);  $^{13}C\{^1H\}$ NMR (100 MHz,  $CDCl_3$ )  $\delta$ : 171.0, 171.0, 159.4, 135.3, 135.3, 134.2, 133.0, 132.6, 131.3, 129.2, 128.8, 128.0, 127.4, 127.4, 126.8, 126.6, 126.3, 126.2, 125.8, 125.8, 125.6, 125.1, 125.0, 124.6, 123.5, 123.3, 120.6, 120.6, 119.5, 116.6, 116.5, 114.6, 114.0, 114.0, 60.0, 59.9, 57.6, 57.5, 55.3, 46.7, 46.6, 31.2, 31.2, 24.3, 24.2, 24.0, 23.4, 21.3, 20.6; HRMS (ESI-TOF)  $m/z$ : :  $C_{31}H_{30}NO_4S (M + H)^+$  calcd for 512.1890 found 512.1891.

**Tert-butyl-4-(((12-(4-methoxyphenyl)-5-methyl-6-oxo-5,6-dihydroindolo[2,1-**

**a]isoquinolin-5-yl)methyl)sulfonyl)piperidine-1-carboxylate (3an):** Yield: 72.4 mg,

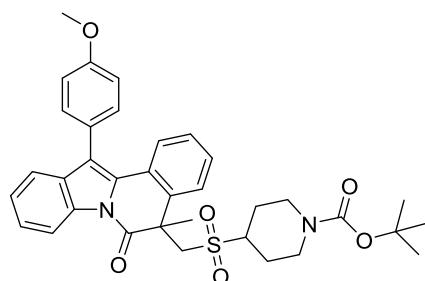

59%; yellow oil;  $^1H$  NMR (400 MHz,  $CDCl_3$ )  $\delta$ : 8.60 (d,  $J = 8.4$  Hz, 1H), 7.53 (d,  $J = 8.4$  Hz, 1H), 7.47 (d,  $J = 8.0$  Hz, 1H), 7.44-7.39 (m, 3H), 7.34-7.29 (m, 3H), 7.10 (t,  $J = 8.4$  Hz, 3H), 4.46 (d,  $J = 14.0$  Hz, 1H), 4.32-4.18 (m, 2H), 3.93 (s, 3H), 3.78 (d,  $J = 14.0$  Hz, 1H), 2.86-2.63 (m, 3H), 2.03 (s,

2H), 1.73-1.60 (m, 5H), 1.44 (s, 9H);  $^{13}C\{^1H\}$ NMR (100 MHz,  $CDCl_3$ )  $\delta$ : 171.0, 159.3, 154.2, 135.2, 134.2, 132.6, 131.2, 129.0, 128.1, 127.5, 126.1, 125.9, 125.9, 125.7, 125.0, 124.7, 120.8, 119.6, 116.5, 114.6, 80.1, 61.4, 57.4, 55.3, 42.8, 41.8, 31.2, 28.7, 28.3, 24.6, 24.5; HRMS (ESI-TOF)  $m/z$ :  $C_{35}H_{39}N_2O_6S (M + H)^+$  calcd for 615.2523, found 615.2526.

**3-(isopropylsulfonyl)-2-(2-((4-methoxyphenyl)ethynyl)phenyl)-2-methyl-N-**

**pentylpropanamide (4ua):** Yield: 66.5 mg, 71%; yellow oil;  $^1H$  NMR (400 MHz,  $CDCl_3$ )  $\delta$ : 7.64 (d,  $J = 7.6$  Hz, 1H), 7.60-7.53 (m, 3H), 7.44-7.34 (m, 2H), 6.89 (d,  $J = 8.8$  Hz, 2H), 5.21 (t,  $J = 5.8$  Hz, 1H), 4.57 (d,  $J = 14.8$  Hz, 1H), 3.85-3.80 (m, 4H),

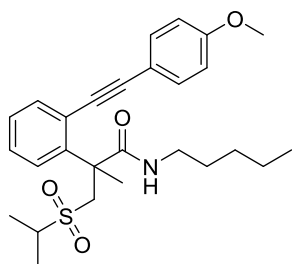

3.26-3.16 (m, 1H), 3.13-3.04 (m, 1H), 2.44-2.36 (m, 1H), 2.06 (s, 3H), 1.40-1.32 (m, 2H), 1.18 (d,  $J = 6.8$  Hz, 3H), 1.15-1.06 (m, 7H), 0.76 (t,  $J = 6.8$  Hz, 3H);  $^{13}\text{C}\{^1\text{H}\}$ NMR (100 MHz,  $\text{CDCl}_3$ )  $\delta$ : 174.8, 159.9, 140.0, 133.2, 132.8, 128.6, 128.3, 128.1, 123.3, 114.5, 114.0, 96.8, 86.3, 55.1, 54.4, 53.2, 49.3, 39.9, 28.7, 28.6, 24.5, 22.0, 15.5, 14.3, 13.7; HRMS (ESI-TOF)  $m/z$ :  $\text{C}_{27}\text{H}_{36}\text{NO}_4\text{S}_2(\text{M} + \text{H})^+$  calcd for 470.2360, found 470.2364.

**3-(isopropylsulfonyl)-2-(2-((4-methoxyphenyl)ethynyl)phenyl)-2-methyl-N-phenethylpropanamide (4va):** Yield: 62.3 mg, 62%; yellow oil;  $^1\text{H}$  NMR (400 MHz,  $\text{CDCl}_3$ )  $\delta$ : 7.58-7.54 (m, 4H), 7.38-7.34 (m, 2H), 7.14 (t,  $J = 7.0$  Hz, 3H), 6.98-6.59 (m, 2H), 6.91 (d,  $J = 8.8$  Hz, 2H), 5.19 (t,  $J = 5.8$  Hz, 1H), 4.56 (d,  $J = 14.8$  Hz, 1H), 3.83 (s, 3H), 3.78 (d,  $J = 8.4$  Hz, 1H), 3.60-3.51 (m, 1H), 3.36-3.26 (m, 1H), 2.76-2.68 (m, 1H), 2.65-2.57 (m, 1H), 2.46-2.38 (m, 1H), 1.99 (s, 3H), 1.19 (d,  $J = 6.4$  Hz, 3H), 1.15 (d,  $J = 7.2$  Hz, 3H);  $^{13}\text{C}\{^1\text{H}\}$ NMR (100 MHz,  $\text{CDCl}_3$ )  $\delta$ : 175.0, 160.0, 139.9, 138.6, 133.4, 133.0, 128.7, 128.5, 128.4, 128.4, 128.2, 126.3, 123.4, 114.6, 114.2, 97.0, 86.5, 55.3, 54.7, 53.3, 49.4, 41.1, 35.3, 24.5, 15.7, 14.5; HRMS (ESI-TOF)  $m/z$ :  $\text{C}_{30}\text{H}_{34}\text{NO}_4\text{S}(\text{M} + \text{H})^+$  calcd for 504.2203, found 504.2206.

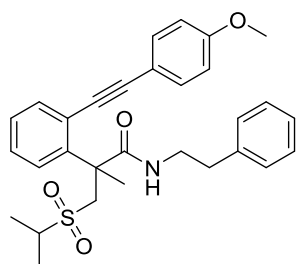

**N-(3,3-diphenylpropyl)-3-(isopropylsulfonyl)-2-(2-((4-methoxyphenyl)ethynyl)phenyl)-2-methylpropanamide (4wa):** Yield: 81.7 mg, 69%; yellow oil;  $^1\text{H}$  NMR (400 MHz,  $\text{CDCl}_3$ )  $\delta$ : 7.55-7.52 (m, 2H), 7.40 (d,  $J = 8.8$  Hz, 2H), 7.39-7.31 (m, 2H), 7.13-6.99 (m, 6H), 6.93 (d,  $J = 6.4$  Hz, 2H), 6.85 (d,  $J = 6.8$  Hz, 2H), 6.77 (d,  $J = 7.2$  Hz, 2H), 5.12 (t,  $J = 6.2$  Hz, 1H), 4.52 (d,  $J = 14.8$  Hz, 1H), 3.79-3.66 (m, 5H), 3.30-3.21 (m, 1H), 2.83-2.72 (m, 1H), 2.39-2.31 (m, 1H), 2.15-2.05 (m, 1H), 2.03-1.95 (m, 1H), 1.93 (s, 3H), 1.10 (d,  $J = 6.8$  Hz, 3H), 1.07 (d,  $J = 6.8$  Hz, 3H);  $^{13}\text{C}\{^1\text{H}\}$ NMR (100 MHz,  $\text{CDCl}_3$ )  $\delta$ : 175.1, 160.0, 144.2, 143.6, 140.0, 133.3, 132.9, 128.8, 128.5, 128.4, 128.3, 128.3, 127.5, 127.4, 126.2, 126.0, 123.4, 114.4, 114.1, 97.1, 86.5, 55.2, 54.6, 53.2,

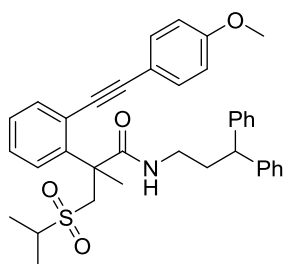

69%; yellow oil;  $^1\text{H}$  NMR (400 MHz,  $\text{CDCl}_3$ )  $\delta$ : 7.55-7.52 (m, 2H), 7.40 (d,  $J = 8.8$  Hz, 2H), 7.39-7.31 (m, 2H), 7.13-6.99 (m, 6H), 6.93 (d,  $J = 6.4$  Hz, 2H), 6.85 (d,  $J = 6.8$  Hz, 2H), 6.77 (d,  $J = 7.2$  Hz, 2H), 5.12 (t,  $J = 6.2$  Hz, 1H), 4.52 (d,  $J = 14.8$  Hz, 1H), 3.79-3.66 (m, 5H), 3.30-3.21 (m, 1H), 2.83-2.72 (m, 1H), 2.39-2.31 (m, 1H), 2.15-2.05 (m, 1H), 2.03-1.95 (m, 1H), 1.93 (s, 3H), 1.10 (d,  $J = 6.8$  Hz, 3H), 1.07 (d,  $J = 6.8$  Hz, 3H);  $^{13}\text{C}\{^1\text{H}\}$ NMR (100 MHz,  $\text{CDCl}_3$ )  $\delta$ : 175.1, 160.0, 144.2, 143.6, 140.0, 133.3, 132.9, 128.8, 128.5, 128.4, 128.3, 128.3, 127.5, 127.4, 126.2, 126.0, 123.4, 114.4, 114.1, 97.1, 86.5, 55.2, 54.6, 53.2,

49.4, 48.6, 38.7, 34.4, 24.5, 15.6, 14.5; HRMS (ESI-TOF)  $m/z$ :  $C_{37}H_{40}NO_4S_2(M + H)^+$  calcd for 594.2673, found 594.2671.

**5-((isopropylsulfonyl)methyl)-12-(4-methoxyphenyl)-5-methylindolo[2,1-**

**a]isoquinolin-6-(5H)-one (4xa):** Yield: 63.6 mg, 69%; yellow oil;  $^1H$  NMR (400

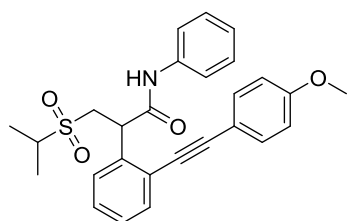

MHz,  $CDCl_3$ )  $\delta$ : 7.68 (s, 1H), 7.59 (d,  $J = 8.8$  Hz, 3H), 7.44-7.37 (m, 3H), 7.34-7.31 (m, 2H), 7.24 (t,  $J = 7.6$  Hz, 2H), 7.50 (t,  $J = 7.4$  Hz, 1H), 6.91 (d,  $J = 8.4$  Hz, 2H), 4.97-4.93 (m, 1H), 4.38-4.31 (m, 1H), 3.83 (s, 3H), 3.47-3.30 (m, 1H), 3.17-3.10 (m, 1H), 1.42 (d,  $J = 6.8$

Hz, 3H), 1.35 (d,  $J = 6.8$  Hz, 3H);  $^{13}C\{^1H\}$ NMR (100 MHz,  $CDCl_3$ )  $\delta$ : 168.4, 160.2, 138.2, 137.5, 133.3, 132.7, 129.0, 128.9, 128.2, 127.7, 124.5, 122.8, 120.0, 114.3, 114.1, 96.1, 85.6, 55.3, 54.0, 51.1, 45.3, 15.7, 14.7; HRMS (ESI-TOF)  $m/z$ :  $C_{27}H_{28}NO_4S$  ( $M + H$ ) $^+$  calcd for 462.1734, found 462.1738.

**2-(2-(hex-1-yn-1-yl)phenyl)-3-(isopropylsulfonyl)-2-methyl-N-**

**phenylpropanamide (4ya):** Yield: 24.3 mg, 40%; yellow oil;  $^1H$  NMR (400 MHz,

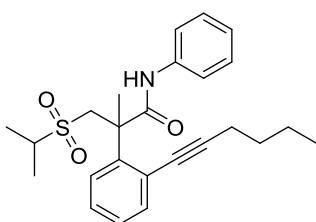

$CDCl_3$ )  $\delta$ : 7.68 (d,  $J = 8.0$  Hz, 1H), 7.50 (d,  $J = 7.6$  Hz, 1H), 7.44 (t,  $J = 7.6$  Hz, 1H), 7.36 (t,  $J = 7.4$  Hz, 1H), 7.33-7.24 (m, 4H), 7.08 (t,  $J = 7.0$  Hz, 1H), 6.80 (s, 1H), 4.50 (d,  $J = 14.2$  Hz, 1H), 3.80 (d,  $J = 14.8$  Hz, 1H), 2.42-2.34 (m, 1H), 2.29 (t,  $J = 14.8$  Hz, 2H), 2.13 (s, 3H), 1.51-

1.45 (m, 2H), 1.44-1.35 (m, 2H), 1.24 (d,  $J = 6.8$  Hz, 3H), 1.20 (d,  $J = 6.8$  Hz, 3H), 0.81 (t,  $J = 7.2$  Hz, 3H);  $^{13}C\{^1H\}$ NMR (100 MHz,  $CDCl_3$ )  $\delta$ : 173.3, 139.7, 137.7, 134.0, 128.8, 128.8, 128.6, 128.4, 124.4, 124.0, 120.2, 99.2, 78.40, 54.7, 53.2, 50.2, 30.1, 24.3, 22.1, 19.2, 16.5, 16.0, 15.7, 14.5, 13.5; HRMS (ESI-TOF)  $m/z$ :  $C_{25}H_{32}NO_4S$  ( $M + H$ ) $^+$  calcd for 426.2097, found 426.2099.

**2-((4-methoxyphenyl)ethynyl)-N-(2-methylallyl)-N-phenylbenzenesulfonamide**

**(1z):**  $^1H$  NMR (400 MHz,  $CDCl_3$ )  $\delta$ : 7.70 (d,  $J = 6.8$  Hz, 1H), 7.65 (d,  $J = 7.6$  Hz,

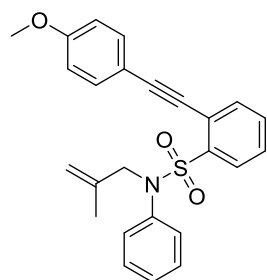

1H), 7.50-7.43 (m, 3H), 7.26-7.11 (m, 6H), 6.89 (d,  $J = 8.8$  Hz, 2H), 4.73 (d,  $J = 8.0$  Hz, 2H), 4.40 (s, 2H), 3.84 (s, 3H), 1.75 (s, 3H);  $^{13}C\{^1H\}$ NMR (100 MHz,  $CDCl_3$ )  $\delta$ : 160.1, 140.5, 139.2, 138.6, 134.5, 133.3, 132.0, 130.7, 128.7, 128.7, 127.4, 127.4, 122.2, 114.7, 114.6, 114.0, 97.1, 85.9, 58.4, 55.3, 19.9; HRMS (ESI-TOF)  $m/z$ :  $C_{25}H_{24}NO_3S$  ( $M + H$ ) $^+$  calcd for

418.1471, found 418.1475.

**5-isobutyl-12-(4-methoxyphenyl)-5-methylindolo[2,1-a]isoquinolin-6-(5H)-one**

(6aa): Yield: 53.6 mg, 70%; yellow oil;  $^1\text{H}$  NMR (400 MHz,  $\text{CDCl}_3$ )  $\delta$ : 8.67 (d,  $J = 8.0$  Hz, 1H), 7.49 (d,  $J = 8.4$  Hz, 1H), 7.43-7.36 (m, 4H), 7.30-7.24 (m, 3H), 7.09 (d,  $J = 6.8$  Hz, 2H), 7.02 (t,  $J = 7.6$  Hz, 1H), 3.93 (s, 3H), 2.46-2.39 (m, 1H), 2.02-1.97 (m, 1H), 1.69 (s, 3H), 1.42-1.36 (m, 1H), 0.68-0.62 (m, 6H);  $^{13}\text{C}\{^1\text{H}\}$  NMR (100 MHz,  $\text{CDCl}_3$ )  $\delta$ : 173.7, 159.4, 139.0, 134.1, 132.6, 131.4, 129.6, 128.1, 126.7, 126.4, 126.2, 125.7, 125.3, 125.1, 124.4, 119.7, 119.3, 116.8, 114.7, 55.3, 50.9, 47.8, 30.9, 25.6, 23.9, 22.6; HRMS (ESI-TOF)  $m/z$ :  $\text{C}_{28}\text{H}_{28}\text{NO}_4\text{S}$  ( $\text{M} + \text{H}$ ) $^+$  calcd for 410.2115, found 410.2118.

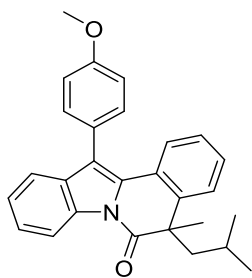



#### 4. Reference

- [1] Noelia Fuentes, Wangqing Kong, Luis Fernández-Sánchez, Esbaliz Merino, and Cristina Nevado, Cyclization Cascades via N-Amidyl Radicals toward Highly Functionalized Heterocyclic Scaffolds. *J. Am. Chem. Soc.* **2015**, 137, 2, 964-973.
- [2] (a) Á. Gutiérrez-Bonet, J.-C. Tellis, J.-K. Matsui, B.-A. Vara, G.-A. Molander, 1,4- Dihydropyridines as Alkyl Radical Precursors: Introducing the Aldehyde Feedstock to Nickel/Photoredox Dual Catalysis. *ACS Catal.*, **2016**, 6, 8004-8008.
- (b) W. Chen, Z. Liu, J. Tian, J. Lia, J. Ma, X. Cheng, G. Li, Building Congested Ketones: Substituted Hantzsch Ester and Nitrile as Alkylation Reagents in Photoredox Catalysis. *J. Am. Chem. Soc.* **2016**, 138, 12312-12315.

## 5. Spectra

### 5-((isopropylsulfonyl)methyl)-12-(4-methoxyphenyl)-5-methylindolo[2,1-a]isoquinolin-6-(5H)-one (3aa)

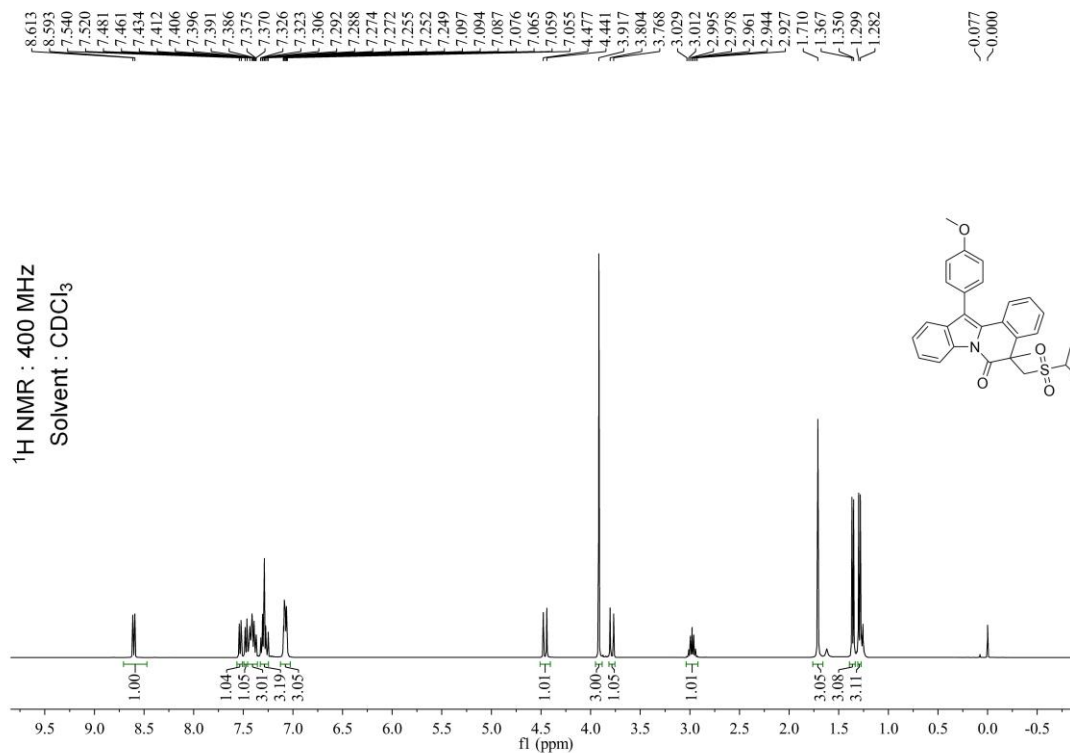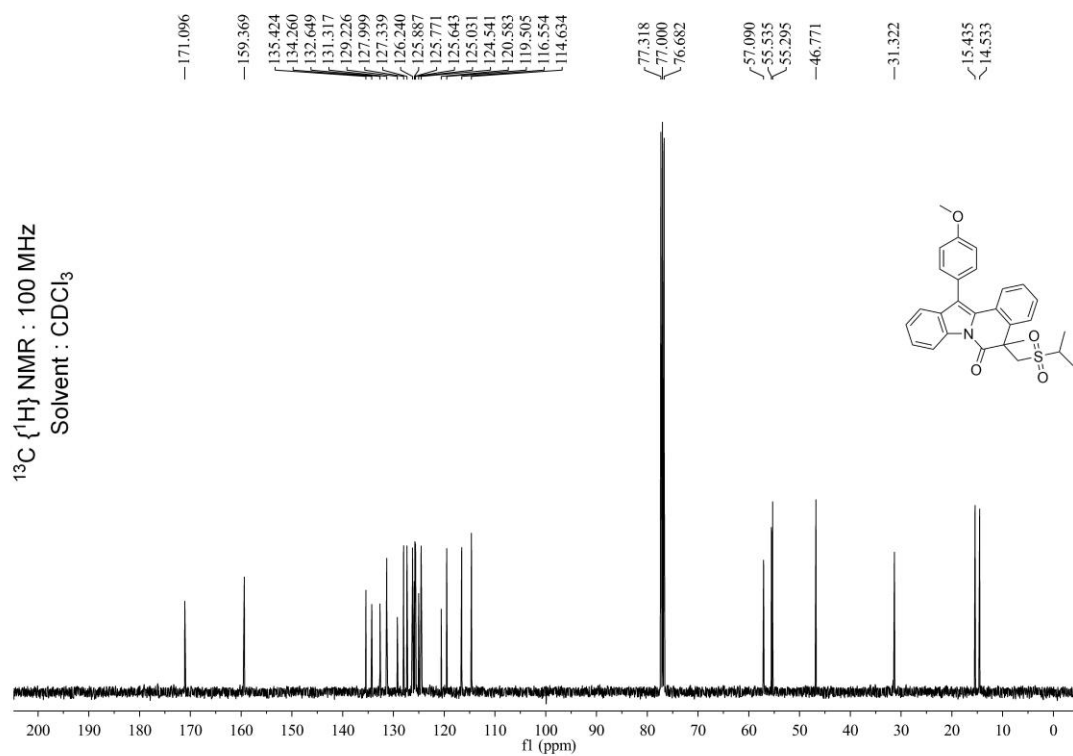

**12-(4-(tert-butyl)phenyl)-5-((isopropylsulfonyl)methyl)-5-methylindolo[2,1-a]isoquinolin-6-(5H)-one (3ba)**

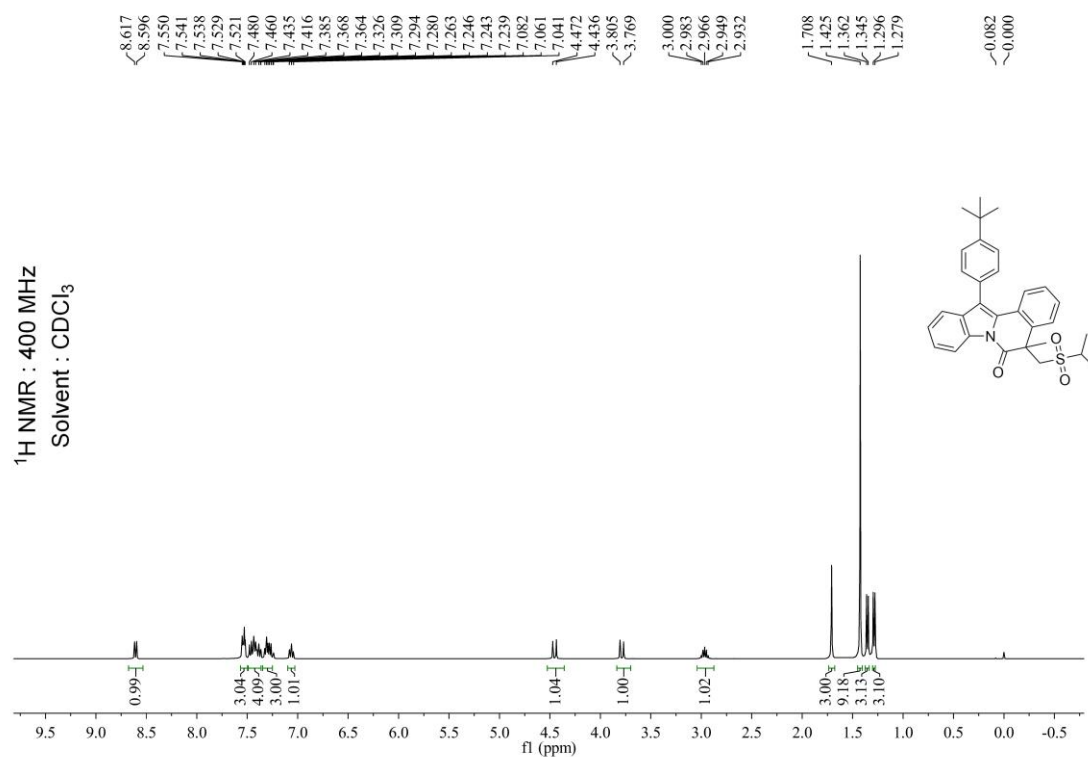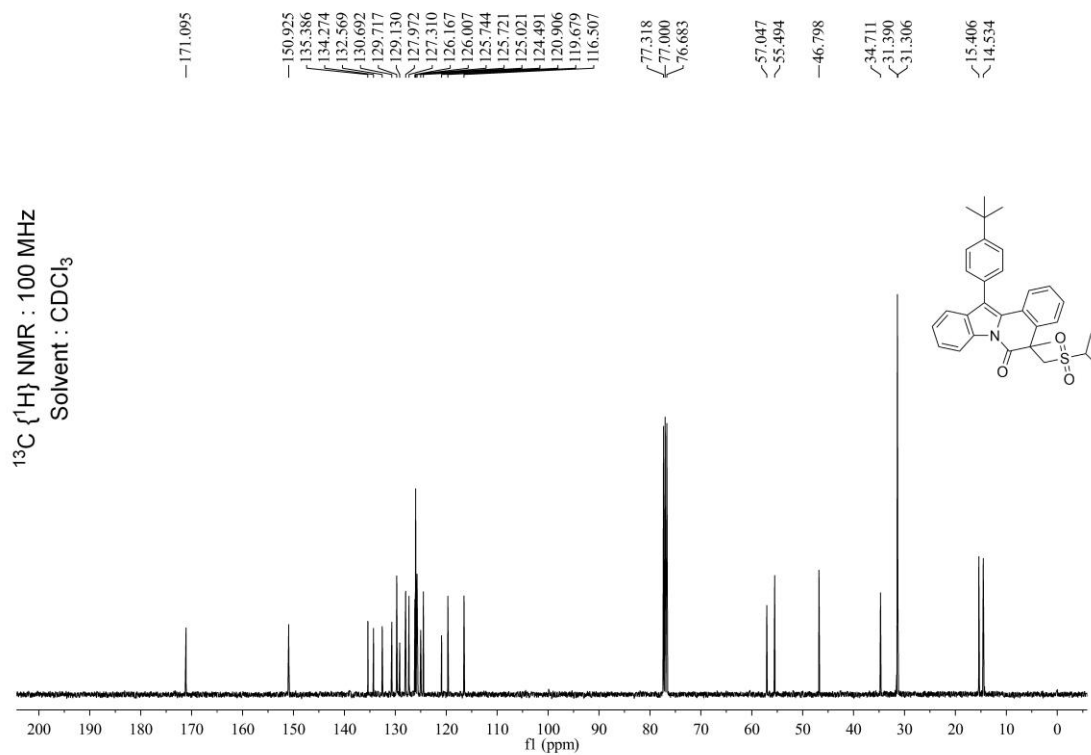

**5-((isopropylsulfonyl)methyl)-5-methyl-12-(p-tolyl)indolo[2,1-a]isoquinolin-6-(5H)-one (3ca)**

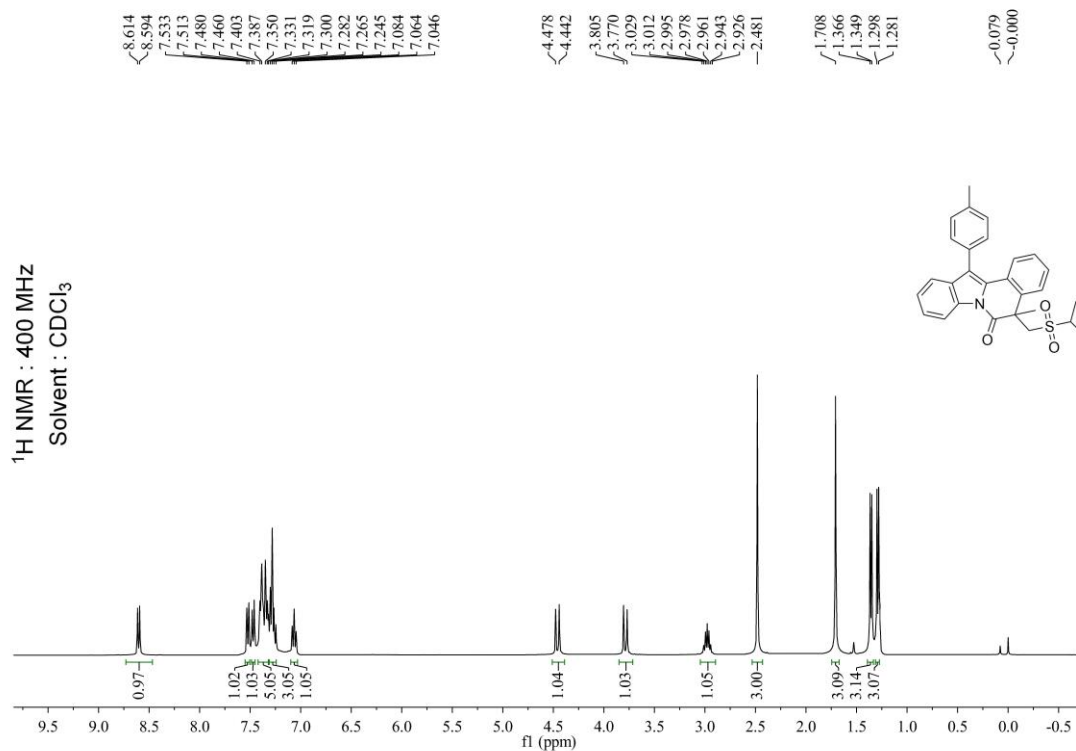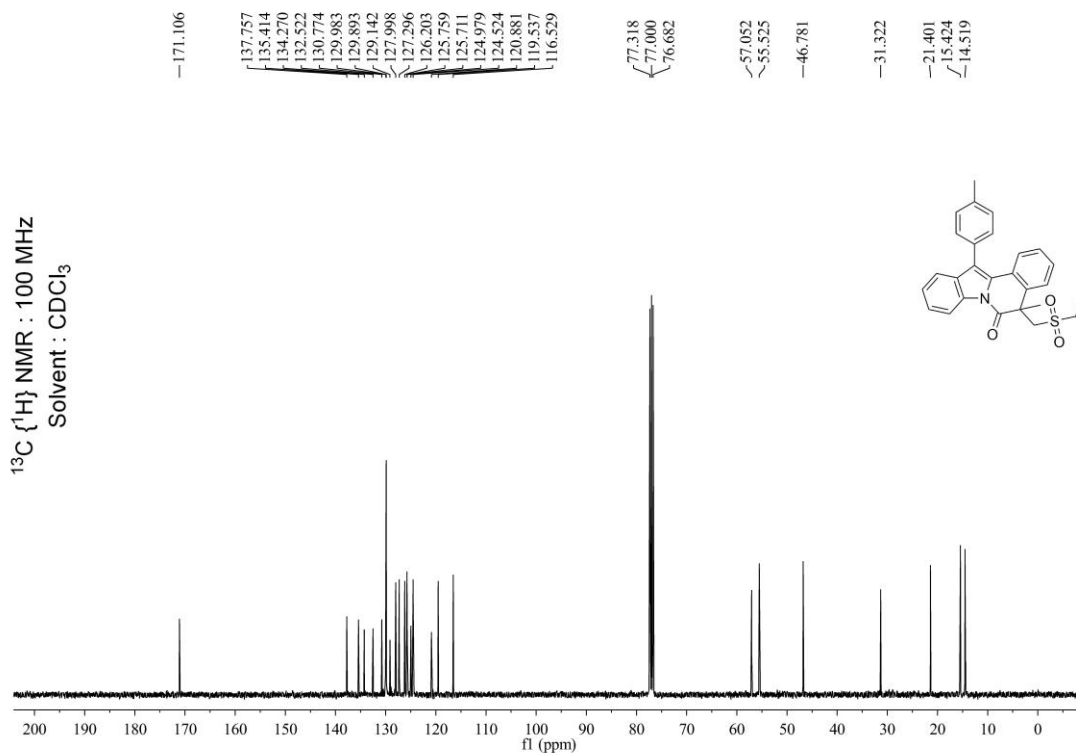

**12-(4-fluorophenyl)-5-((isopropylsulfonyl)methyl)-5-methylindolo[2,1-a]isoquinolin-6-(5H)-one (3da)**

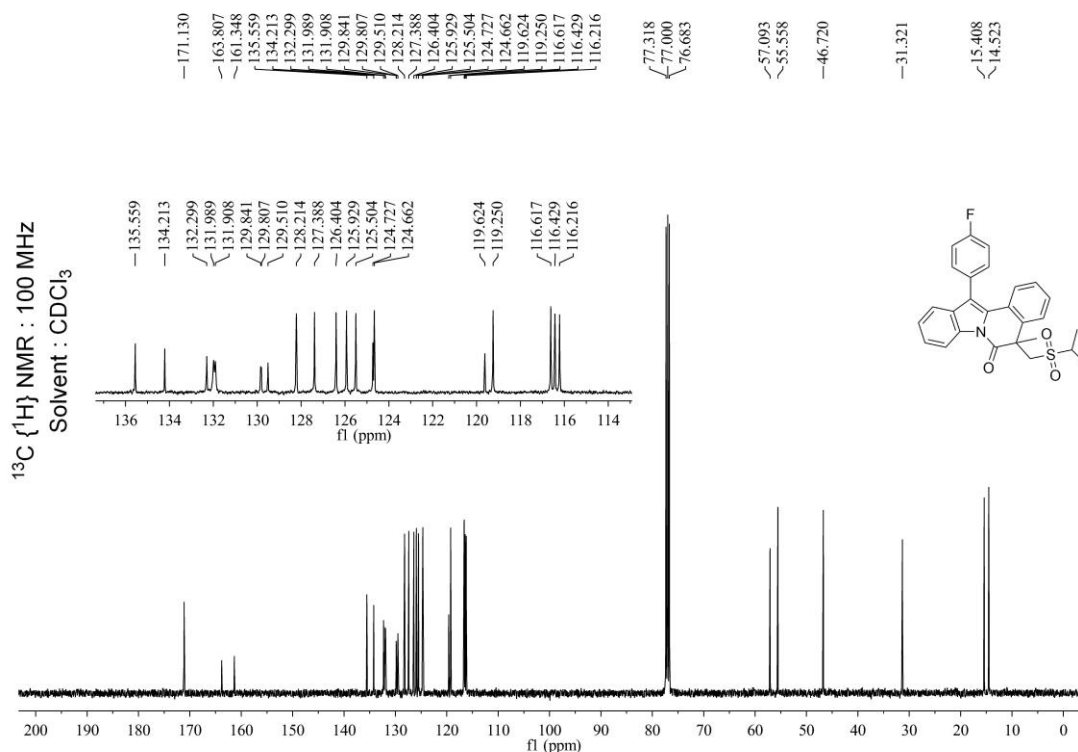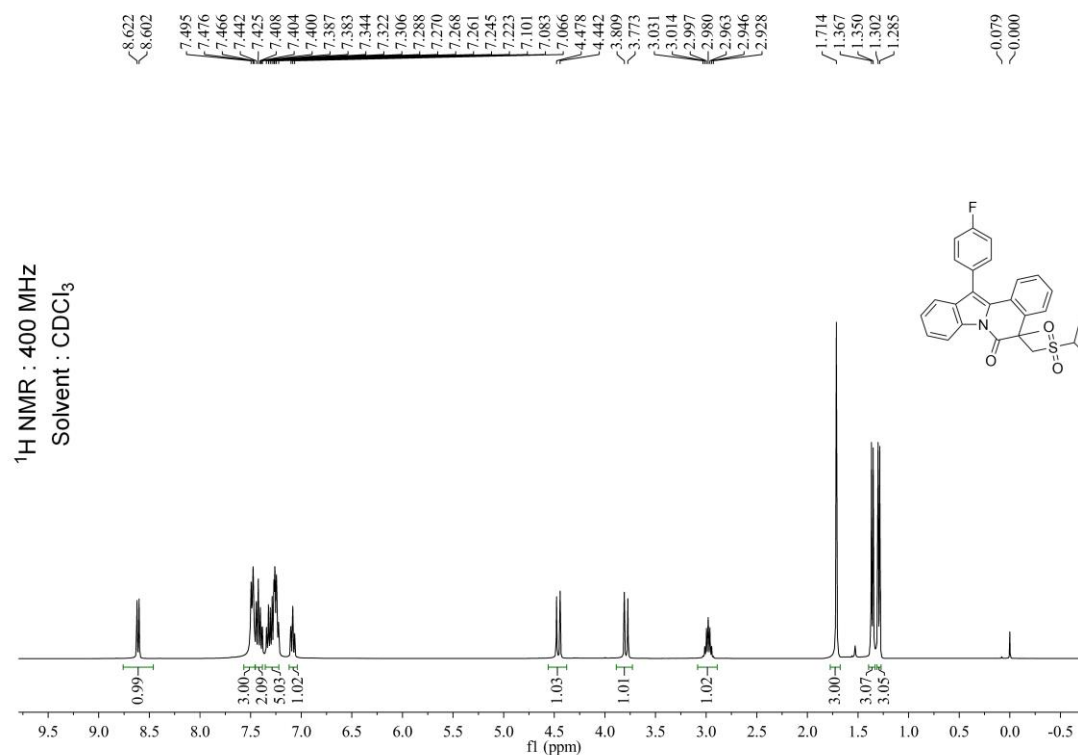

$^{19}\text{F}$  NMR : 282 MHz  
Solvent :  $\text{CDCl}_3$

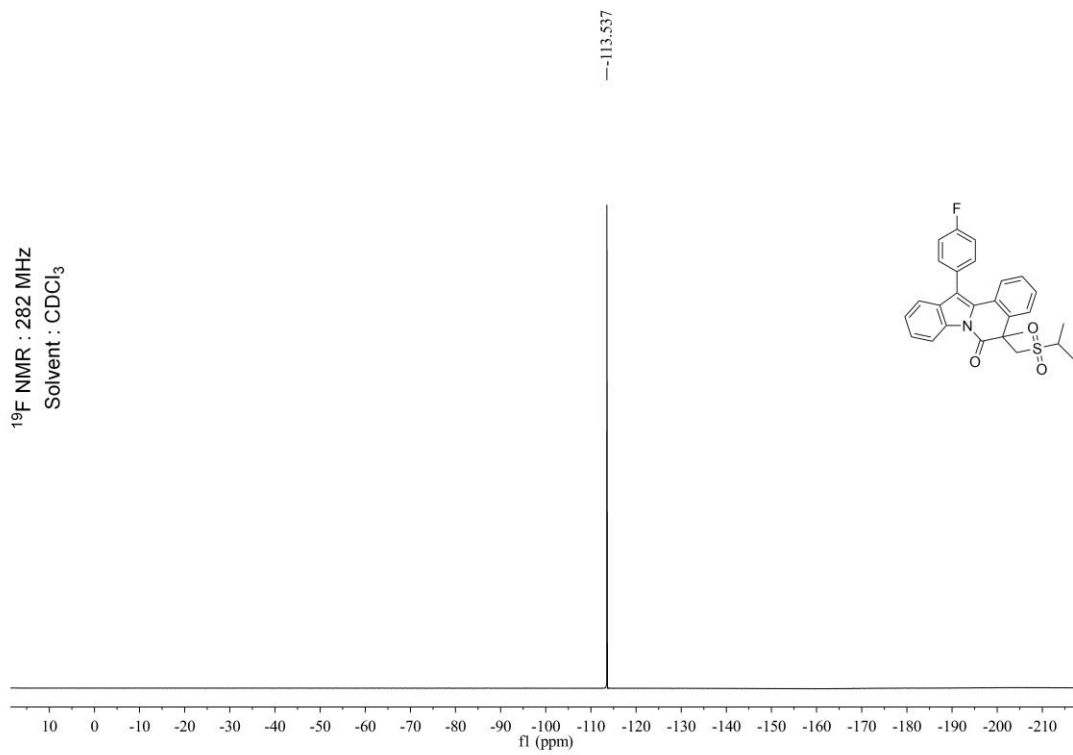

**12-(4-chlorophenyl)-5-((isopropylsulfonyl)methyl)-5-methylindolo[2,1-a]isoquinolin-6-(5H)-one (3ea)**

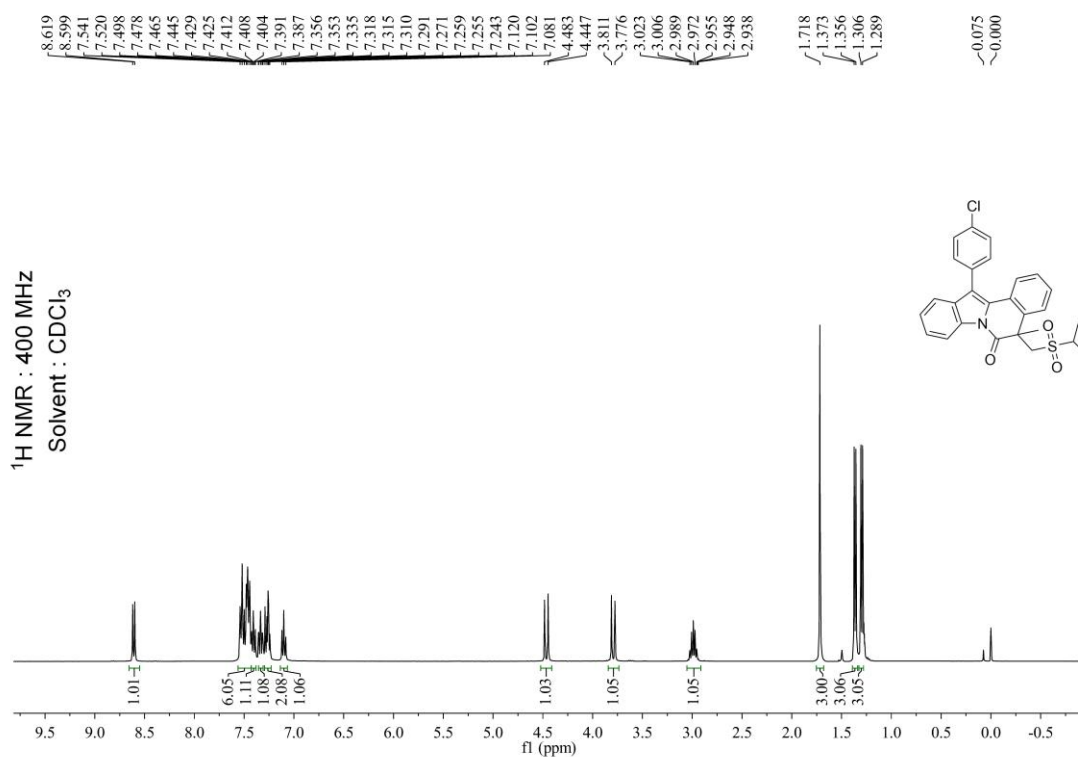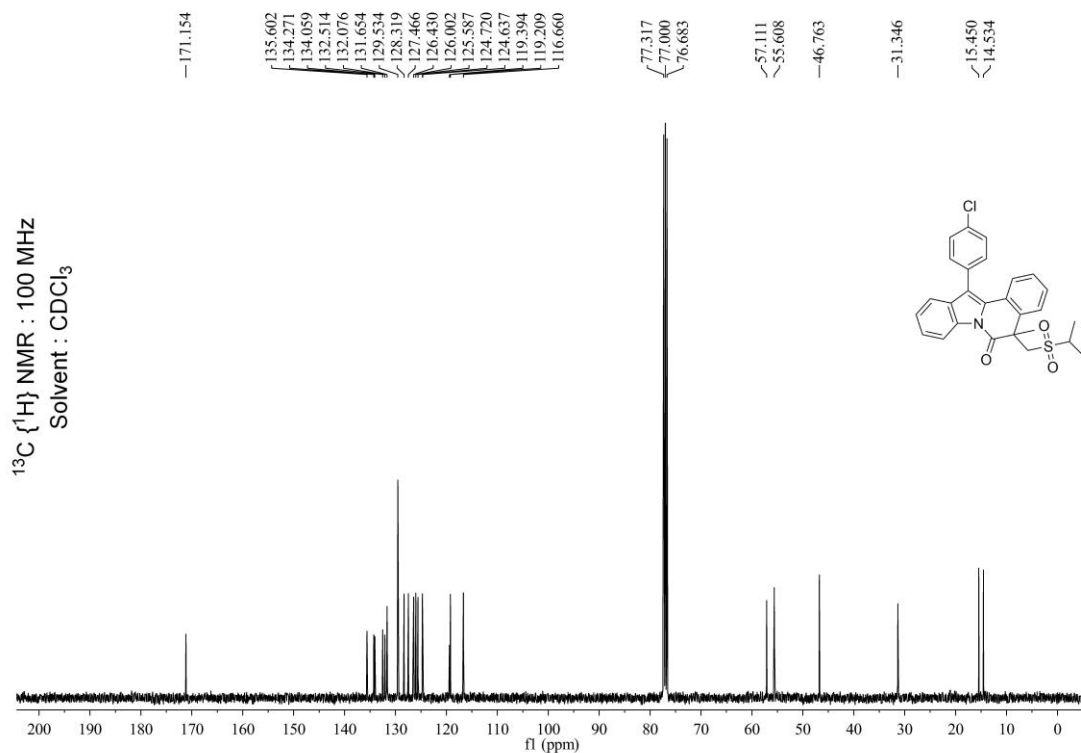

**5-((isopropylsulfonyl)methyl)-12-(3-methoxyphenyl)-5-methylindolo[2,1-a]isoquinolin-6-(5H)-one (3fa)**

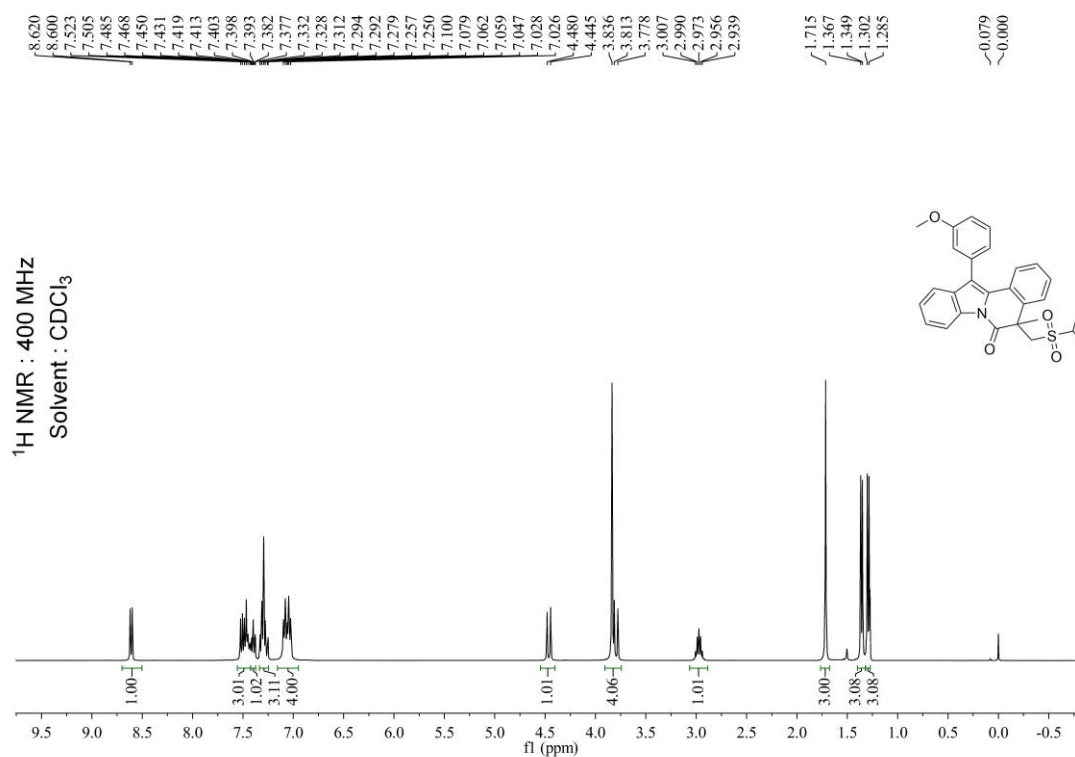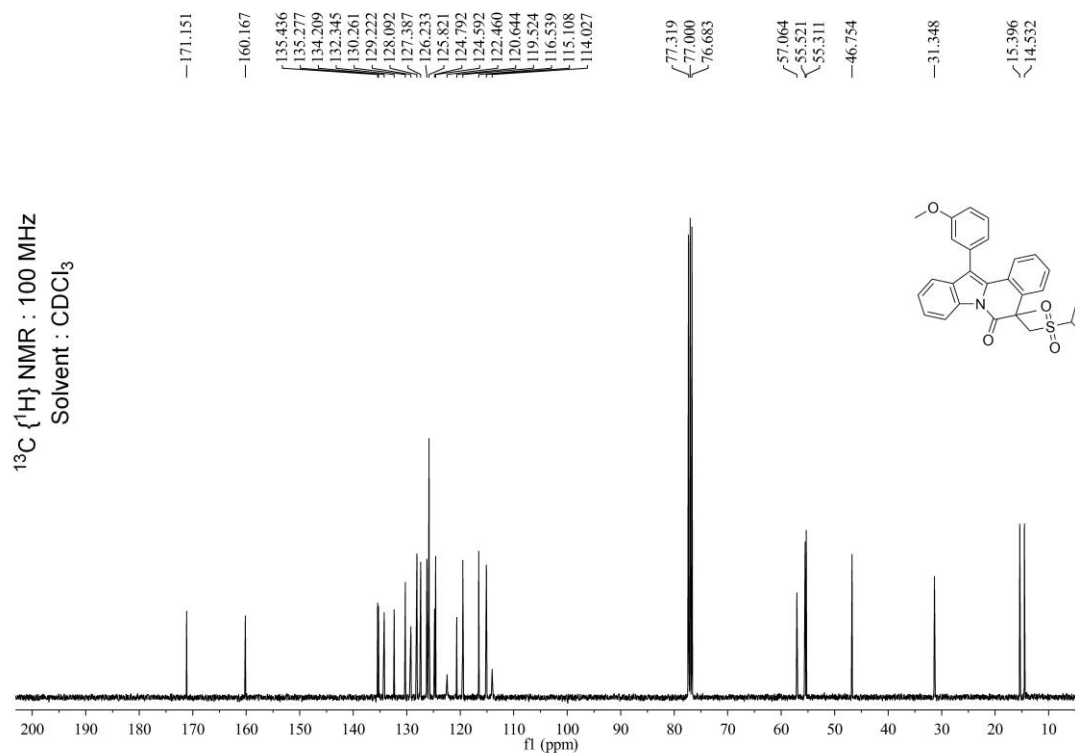



**12-(3-chlorophenyl)-5-((isopropylsulfonyl)methyl)-5-methylindolo[2,1-a]isoquinolin-6-(5H)-one (3ga)**

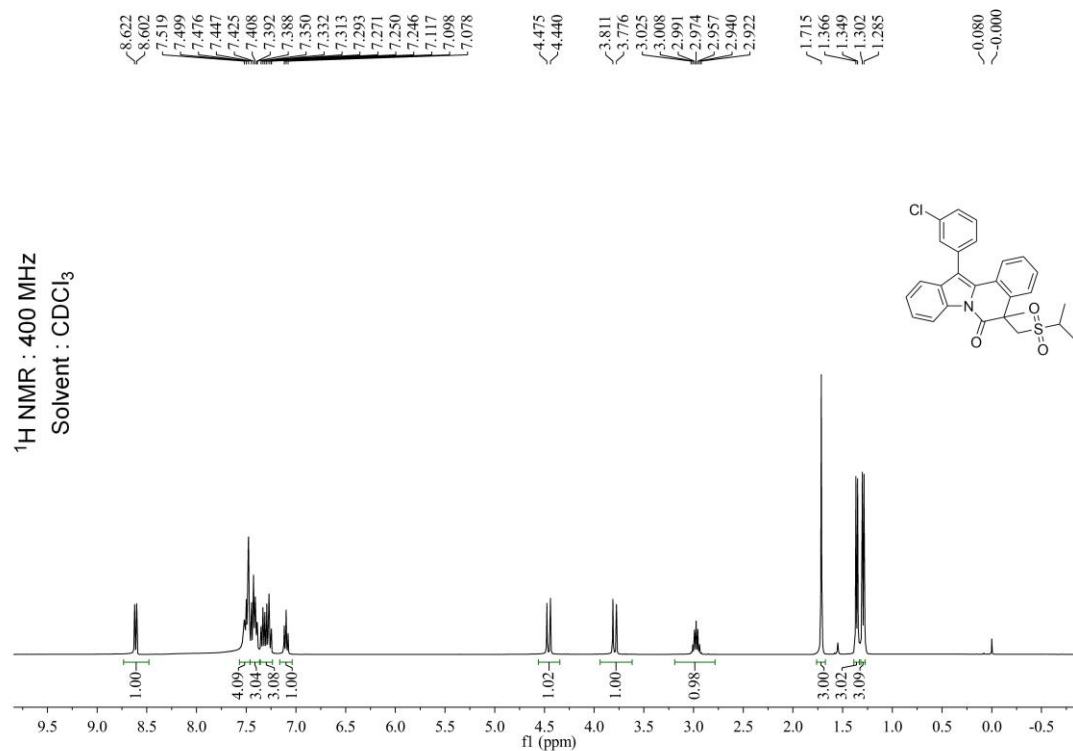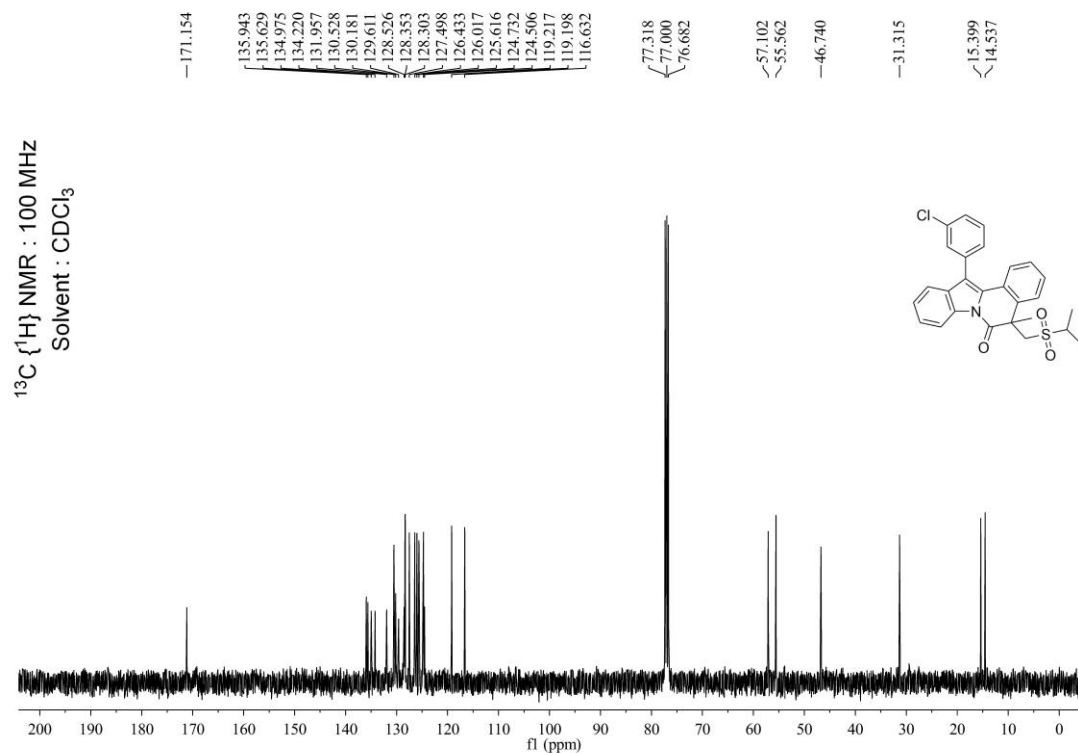

**5-((isopropylsulfonyl)methyl)-5-methyl-12-(o-tolyl)indolo[2,1-  
a]isoquinolin-6-(5H)-one (3ha). diastereoisomer mixture:  $dr = 1:1$**

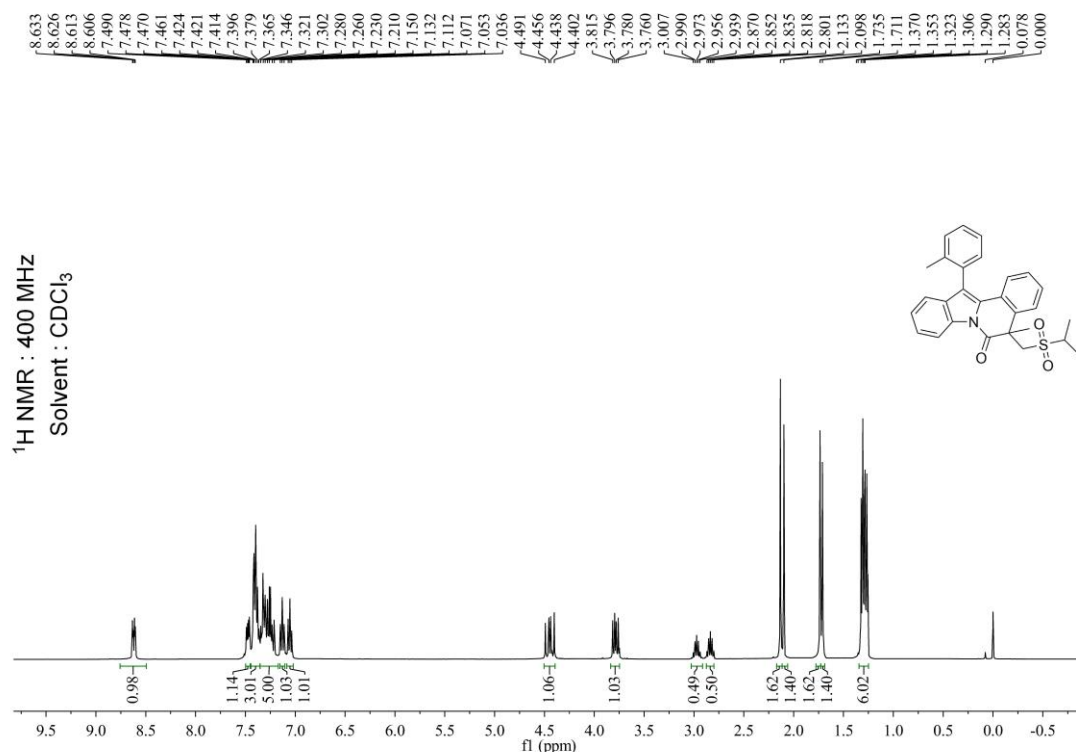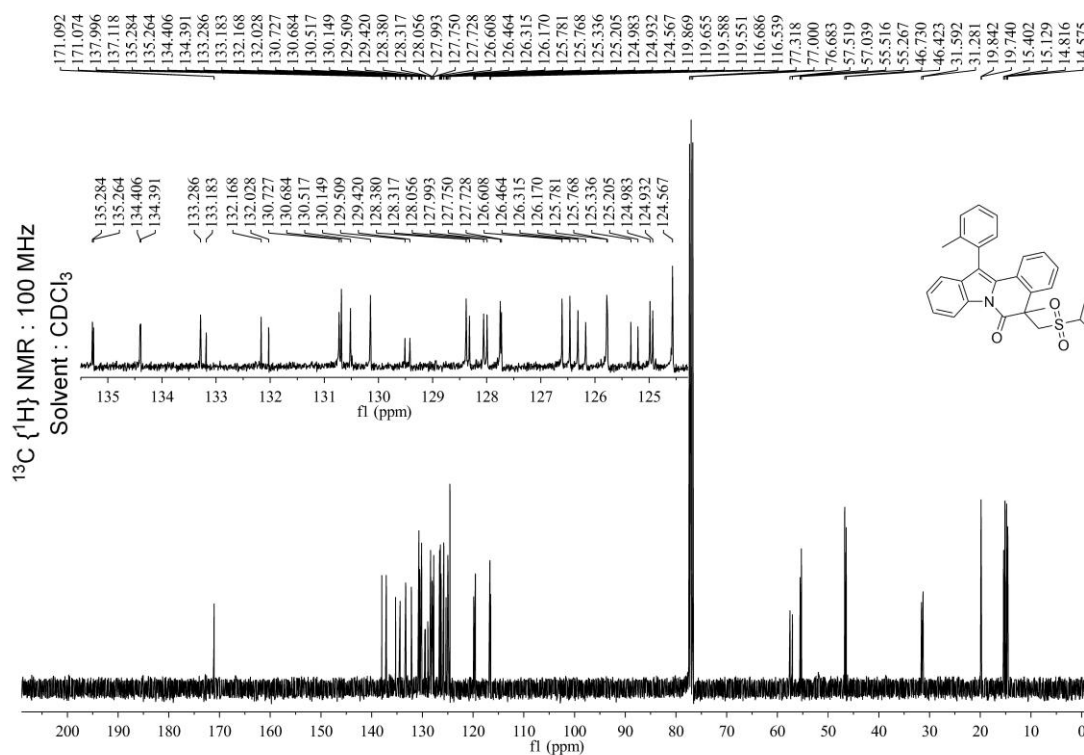

**12-(2-chlorophenyl)-5-((isopropylsulfonyl)methyl)-5-methylindolo[2,1-a]isoquinolin-6-(5H)-one (3ia).**

diastereoisomer mixture:  $dr = 1:1$

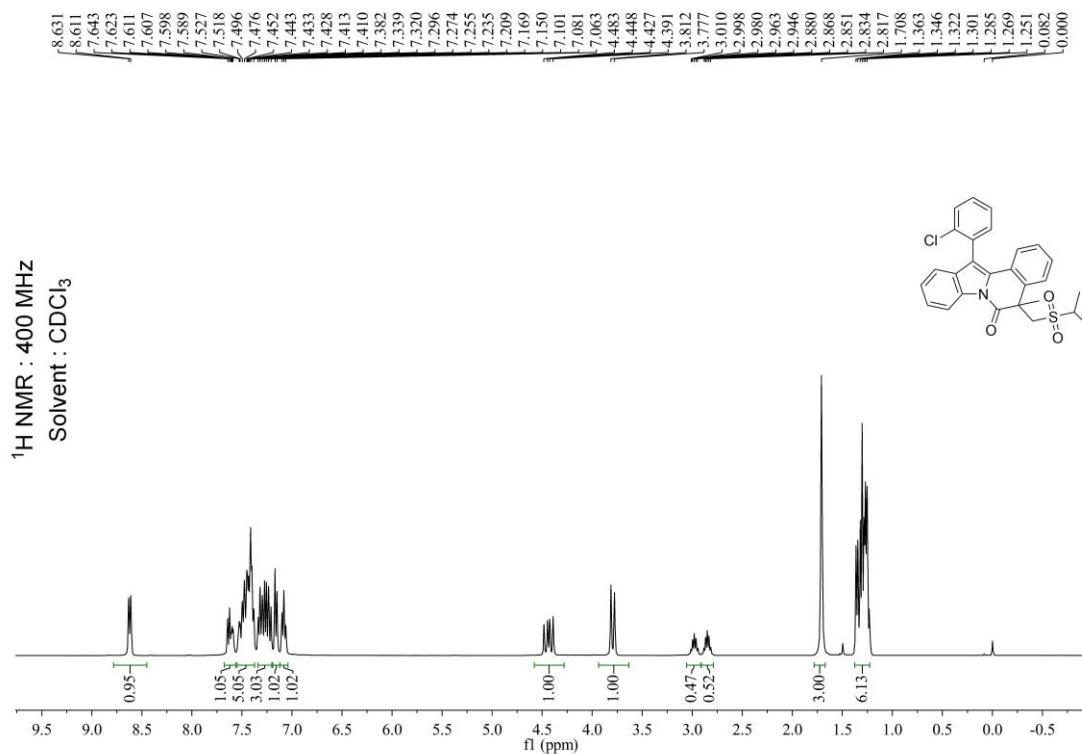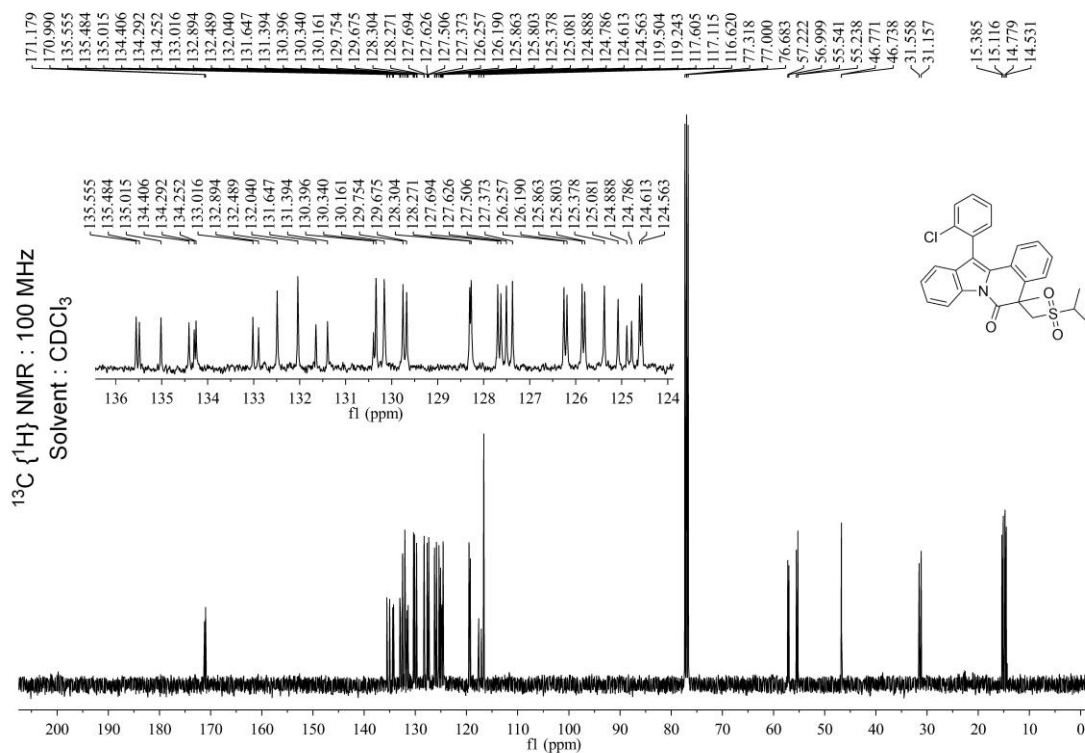

**5-((isopropylsulfonyl)methyl)-5-methyl-12-(pyridin-3-yl)indolo[2,1-a]isoquinolin-6-(5H)-one (3ja)**

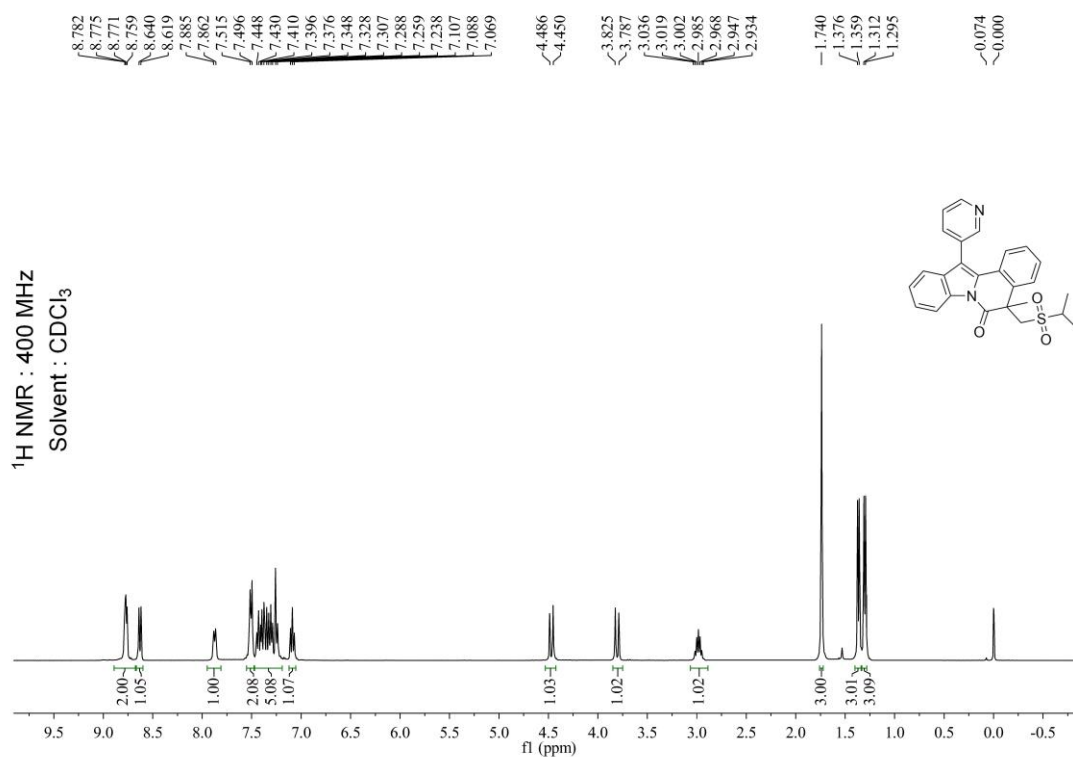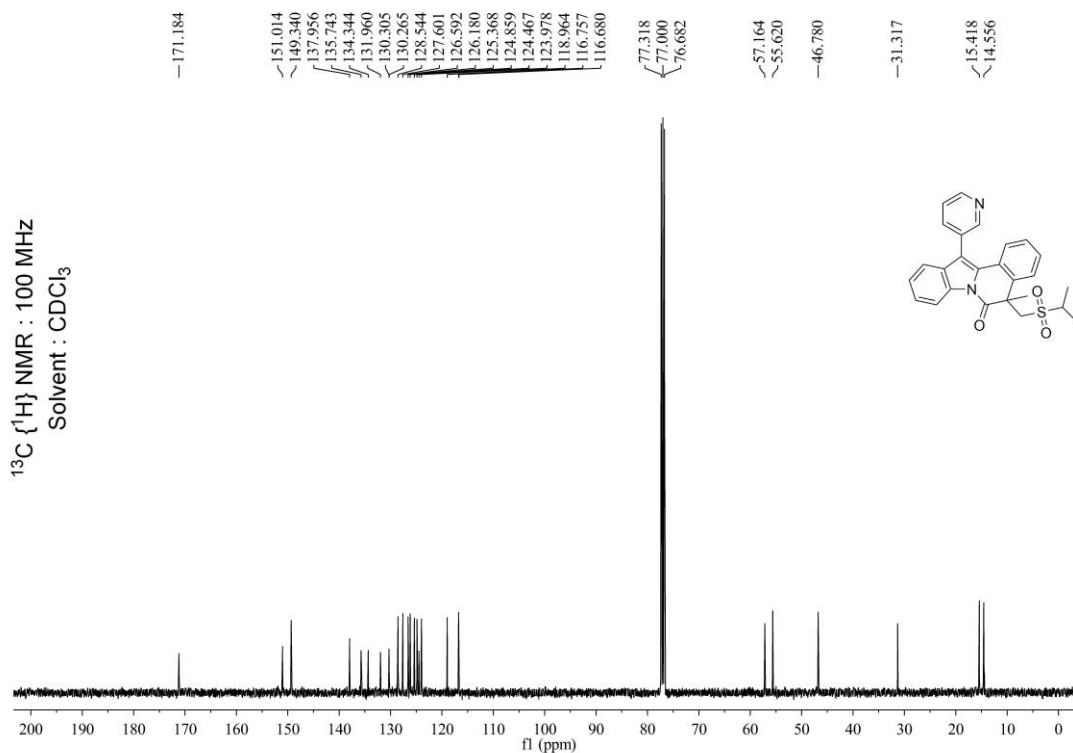

**5-((isopropylsulfonyl)methyl)-5-methyl-12-(thiophen-2-yl)indolo[2,1-a]isoquinolin-6-(5H)-one (3ka)**

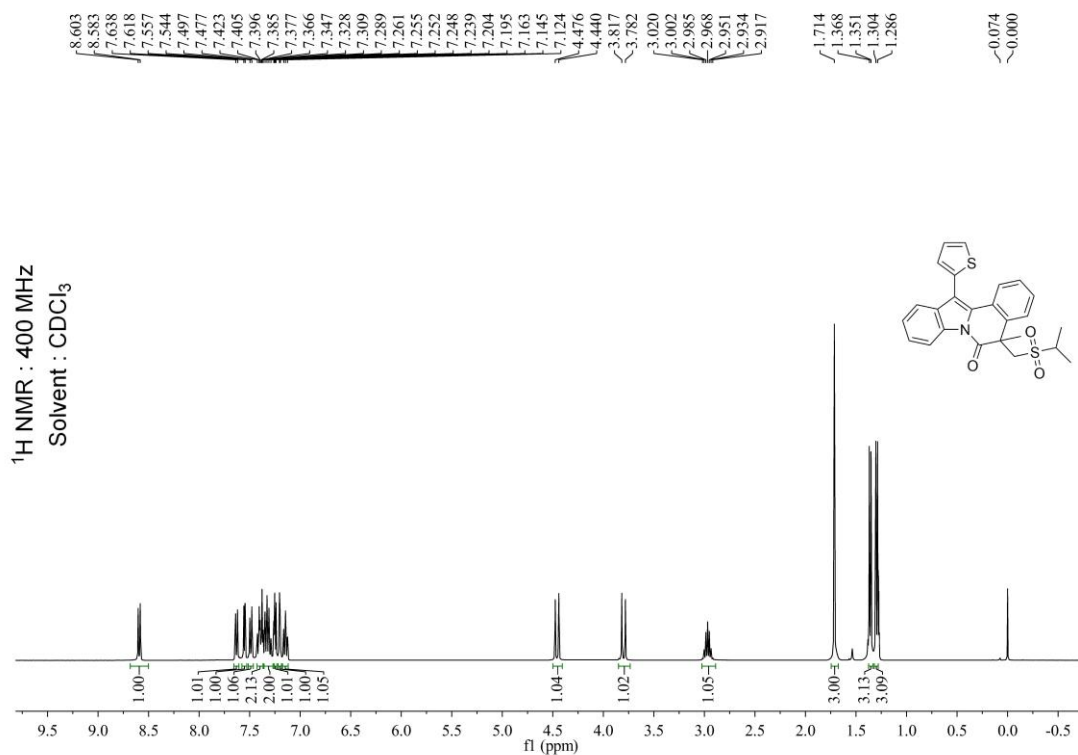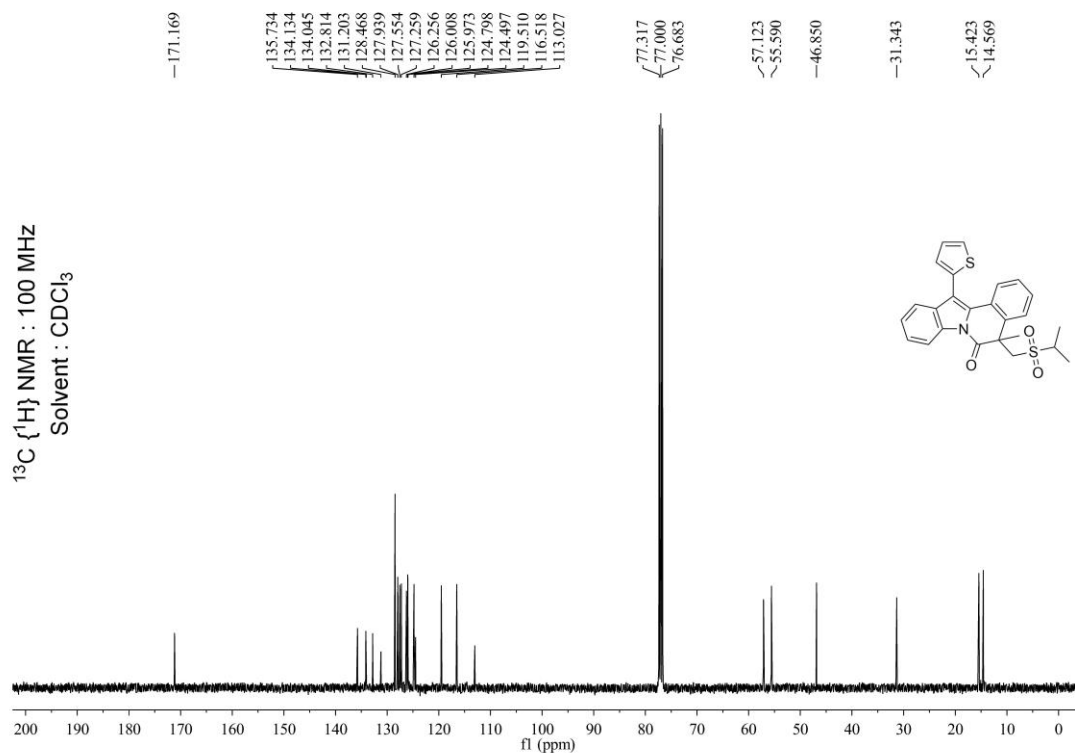

**5-((isopropylsulfonyl)methyl)-10-methoxy-12-(4-methoxyphenyl)-5-methylindolo[2,1-a]isoquinolin-6-(5H)-one (3la)**

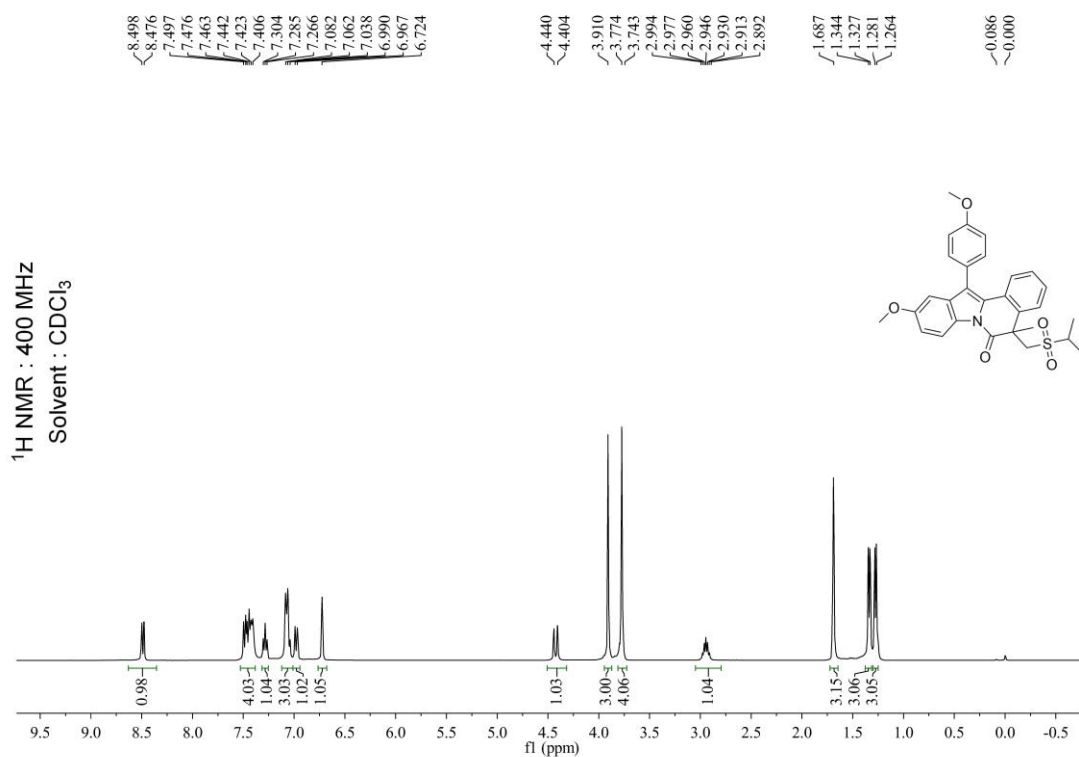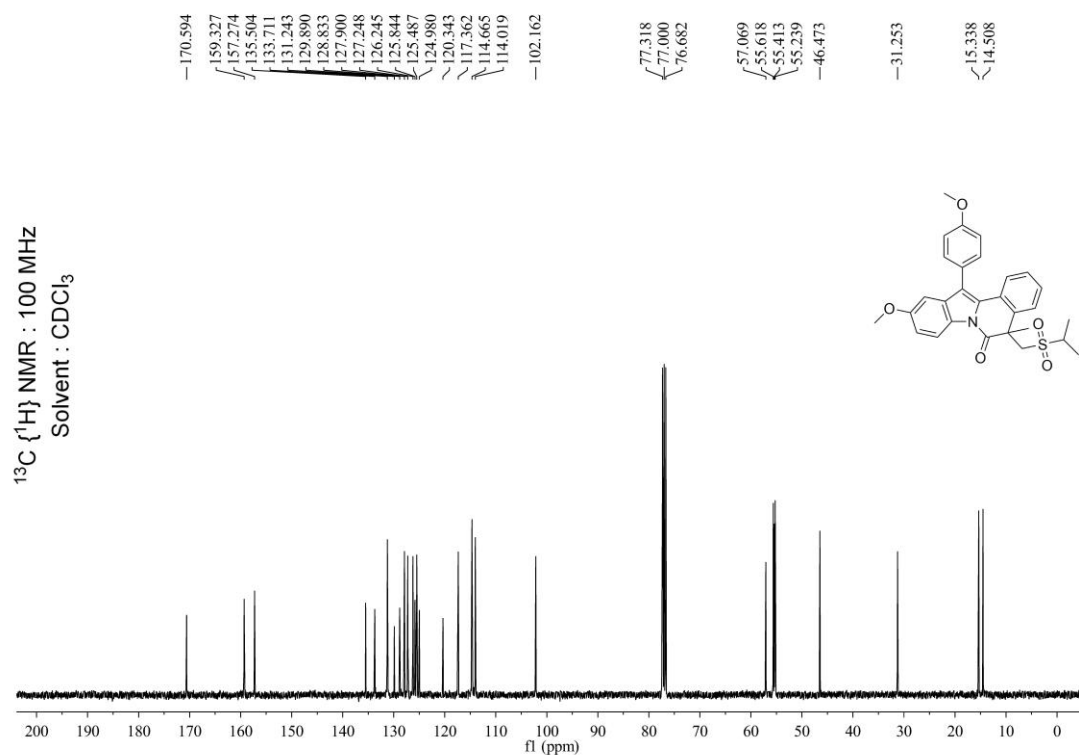

**5-((isopropylsulfonyl)methyl)-12-(4-methoxyphenyl)-5,10-dimethylindolo[2,1-a]isoquinolin-6-(5H)-one (3ma)**

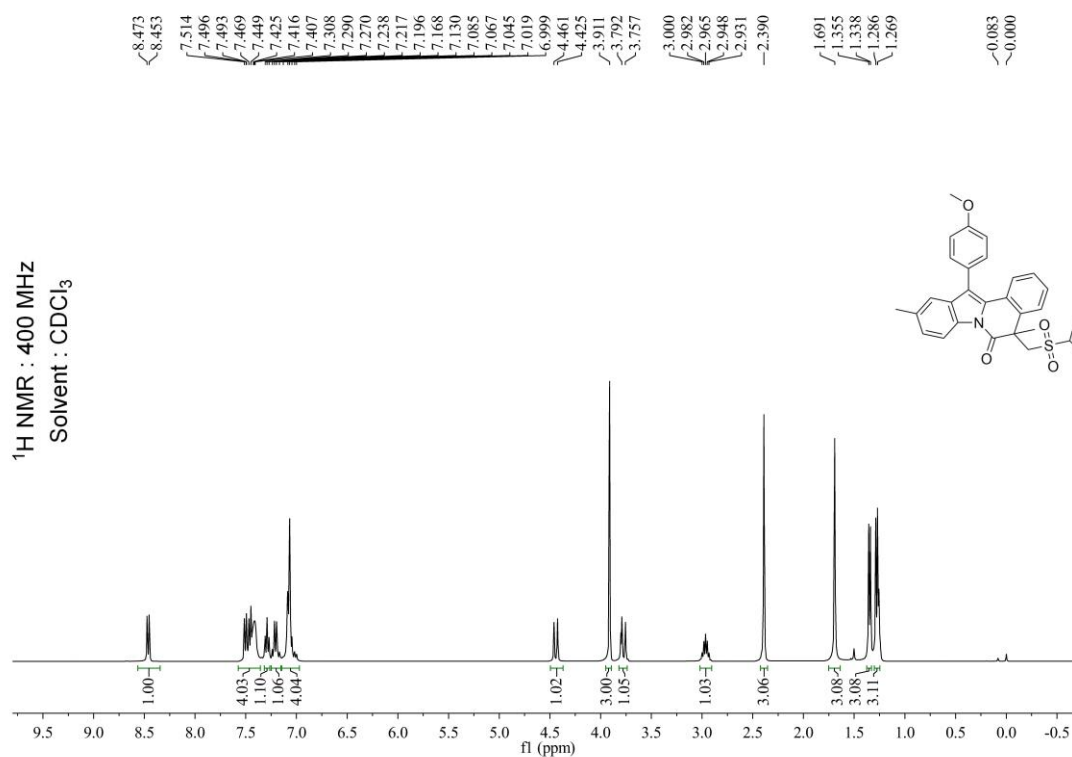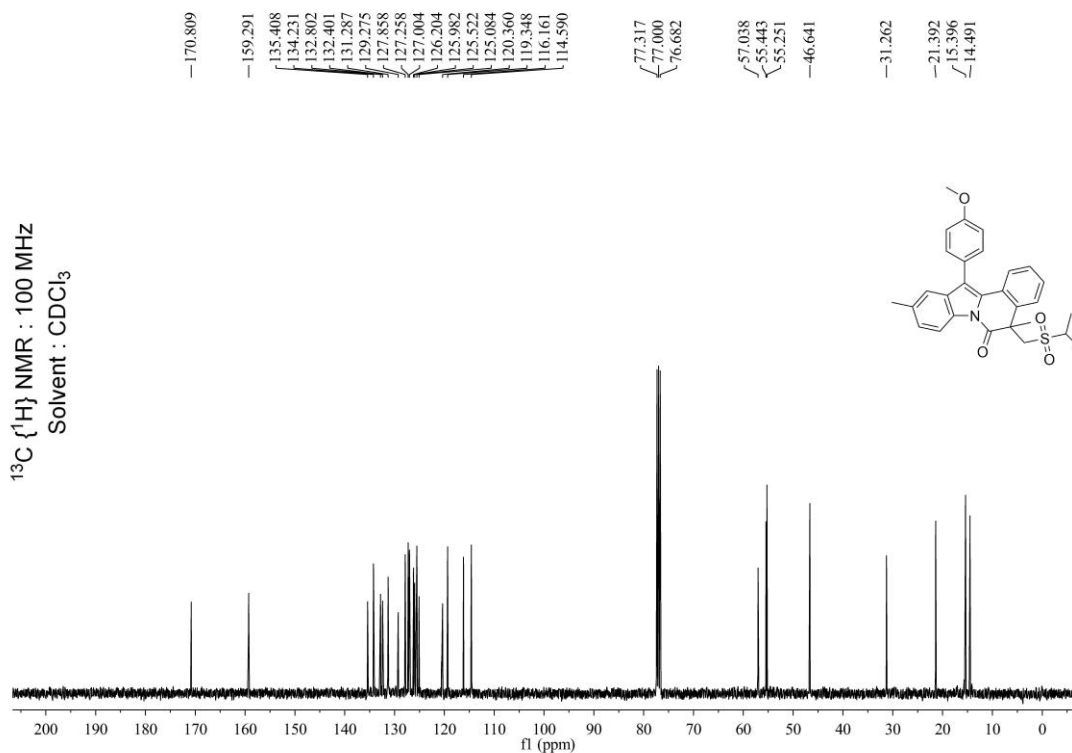

**10-(tert-butyl)-5-((isopropylsulfonyl)methyl)-12-(4-methoxyphenyl)-  
5-methylindolo[2,1-a]isoquinolin-6-(5H)-one (3na)**

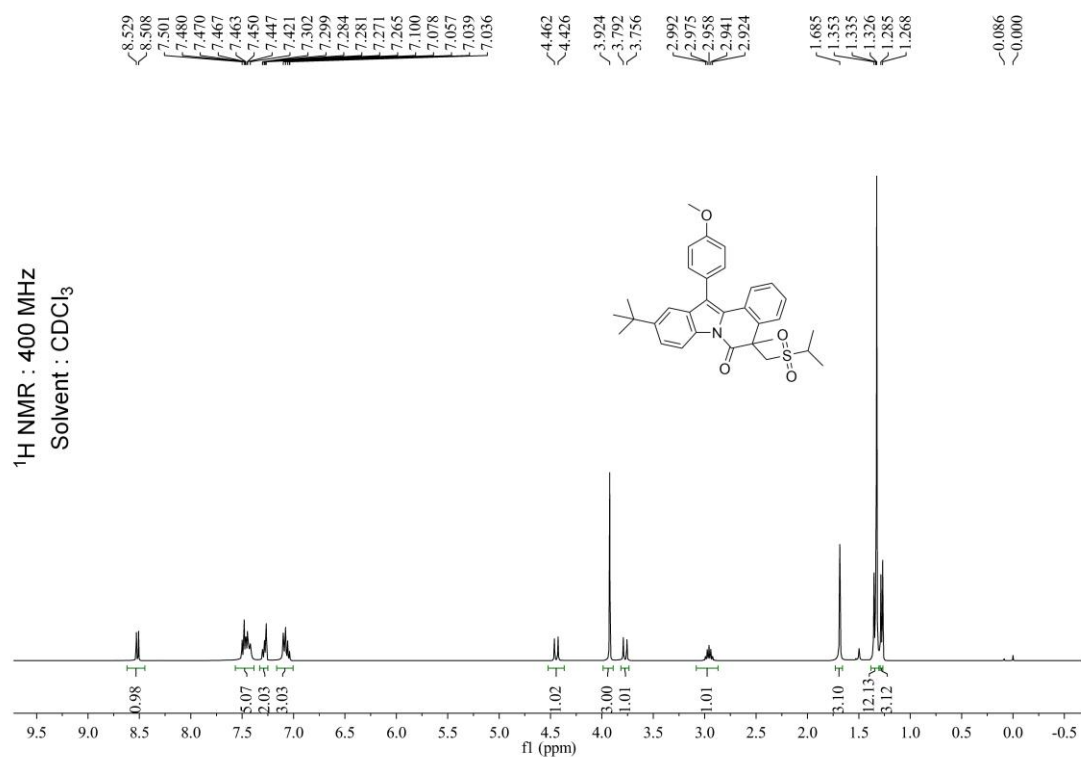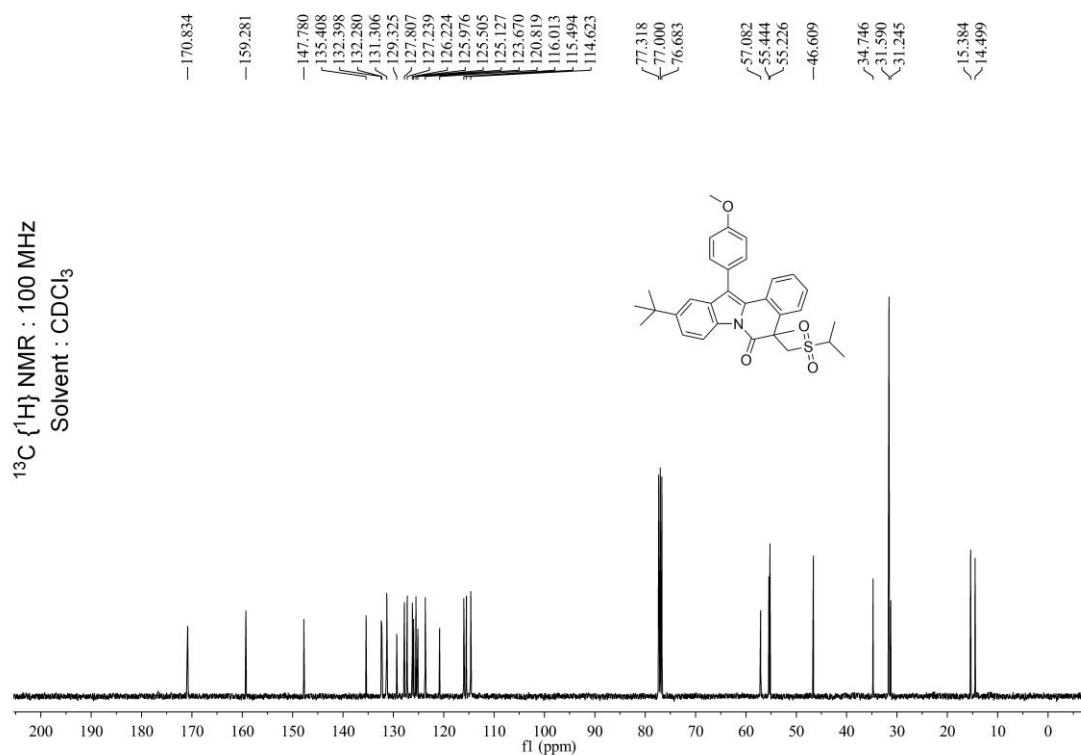



**10-fluoro-5-((isopropylsulfonyl)methyl)-12-(4-methoxyphenyl)-5-methylindolo[2,1-a]isoquinolin-6-(5H)-one (30a)**

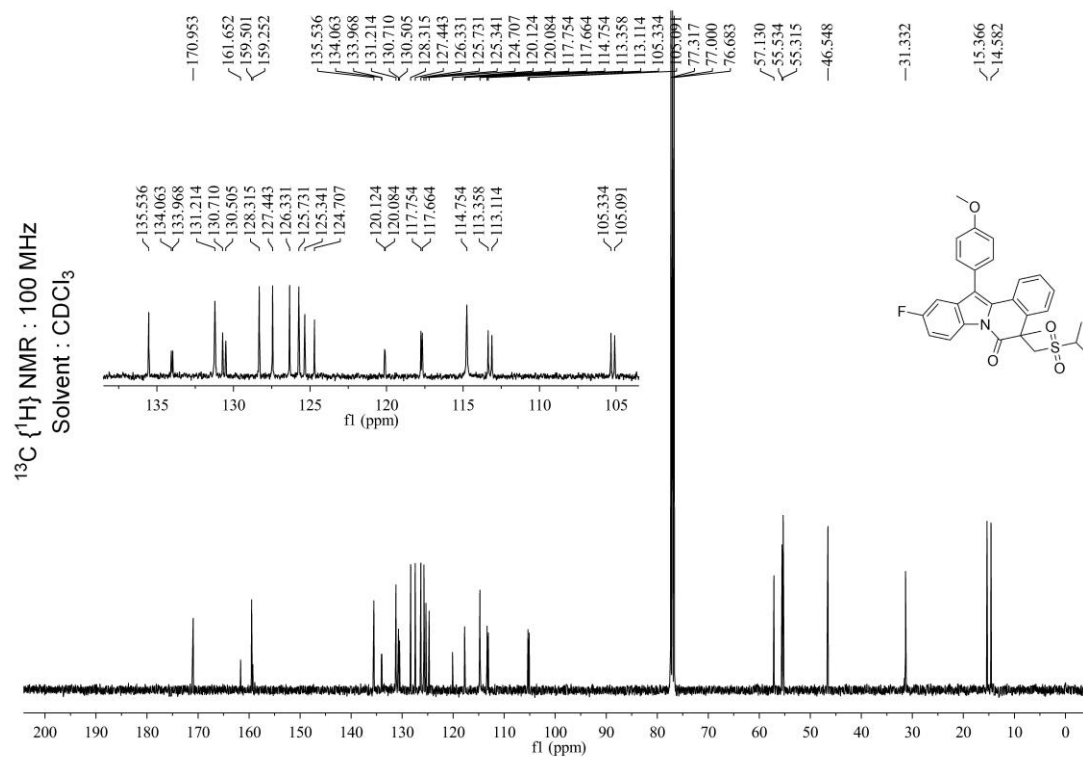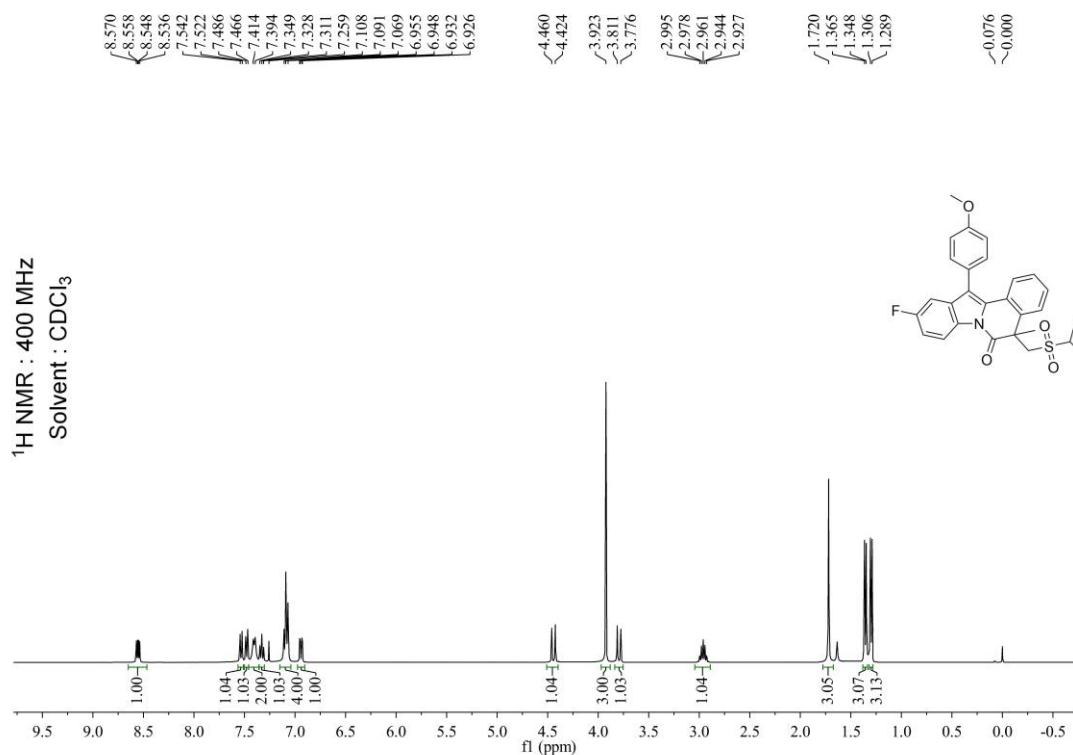

<sup>19</sup>F NMR : 282 MHz  
Solvent : CDCl<sub>3</sub>

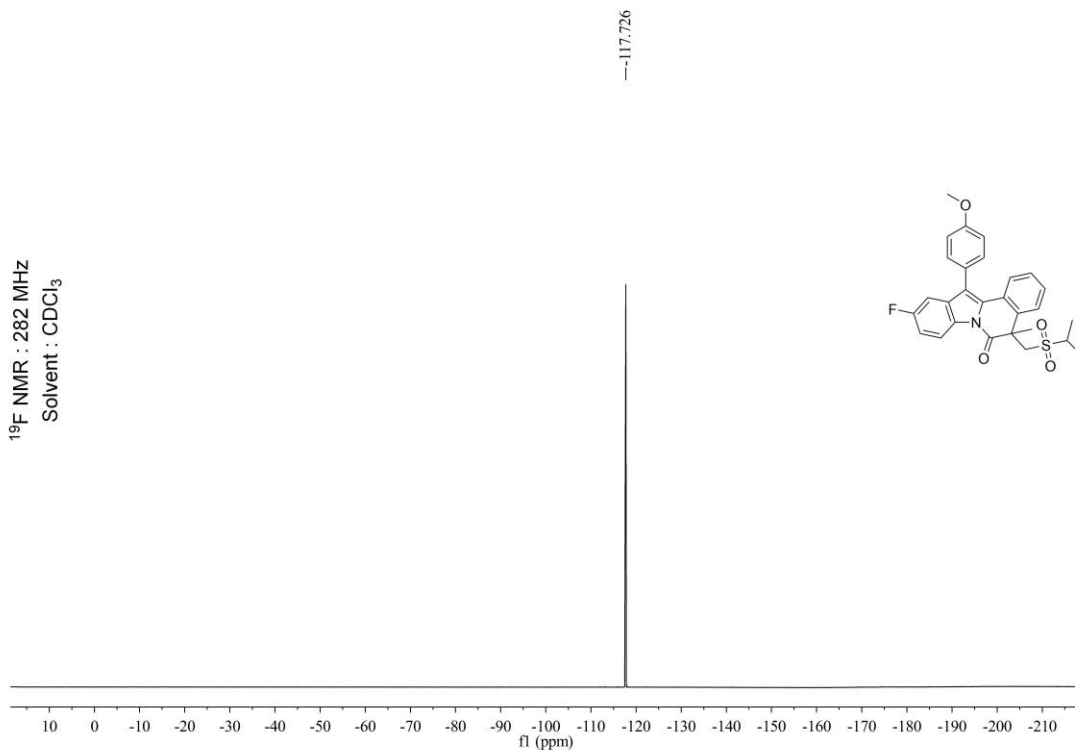

**10-chloro-5-((isopropylsulfonyl)methyl)-12-(4-methoxyphenyl)-5-methylindolo[2,1-a]isoquinolin-6-(5H)-one (3pa)**

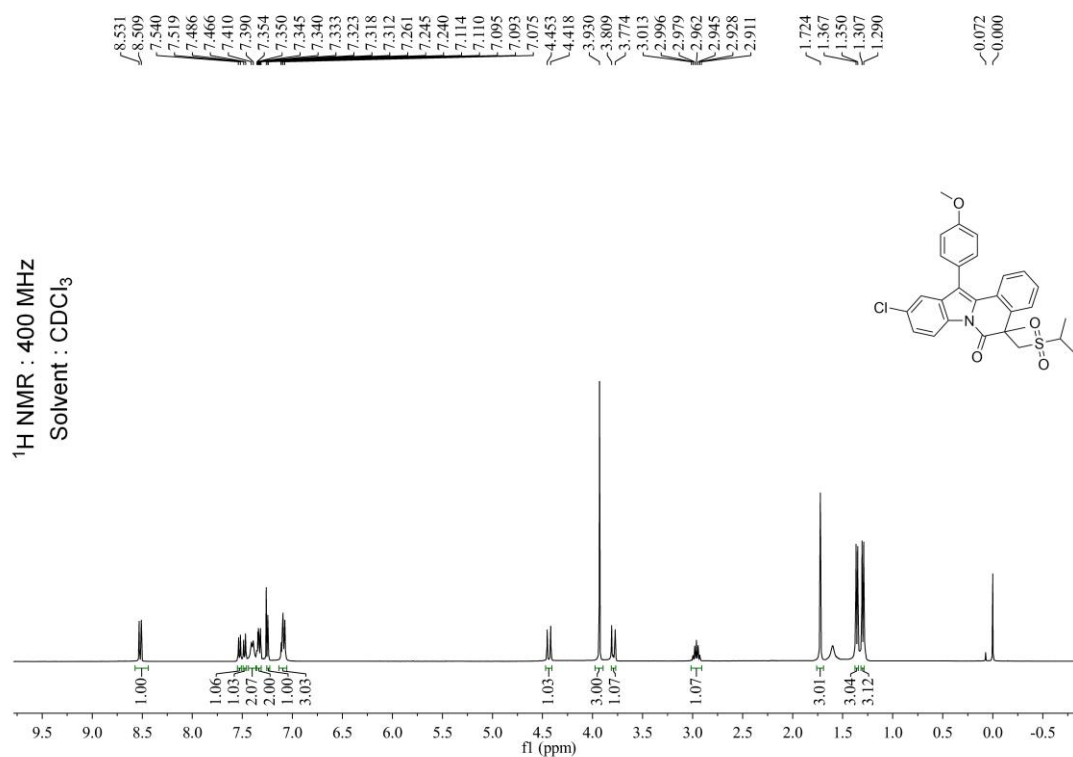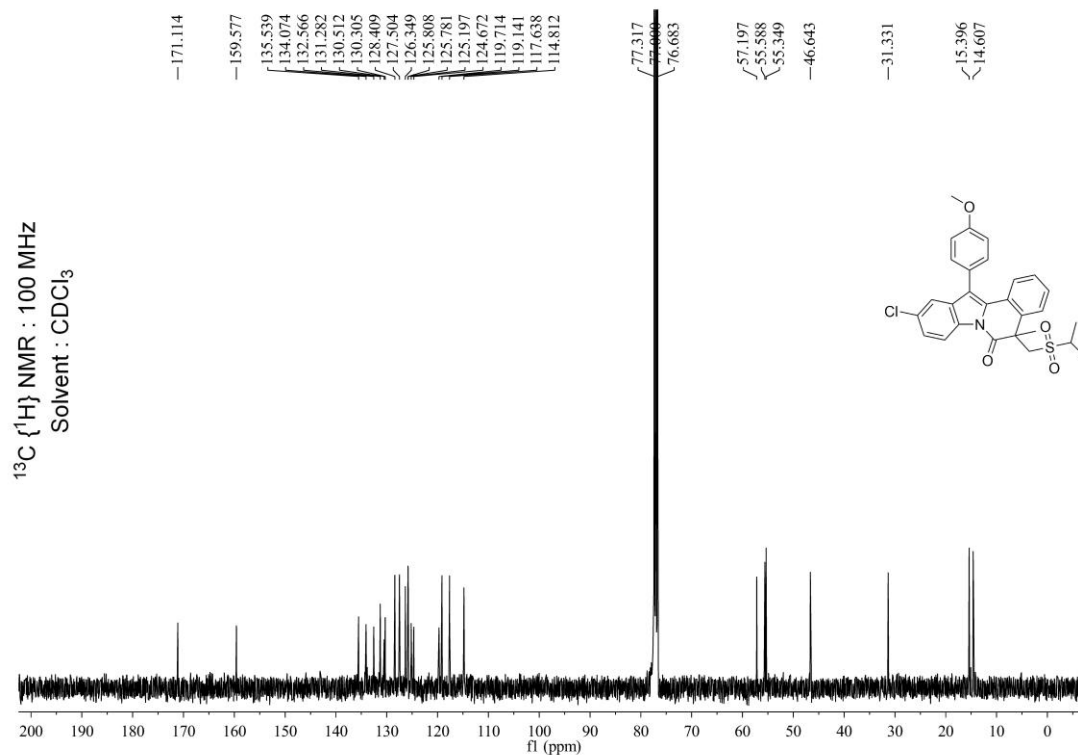

**5-((isopropylsulfonyl)methyl)-12-(4-methoxyphenyl)-5-methyl-10-phenylindolo[2,1-a]isoquinolin-6-(5H)-one (3qa)**

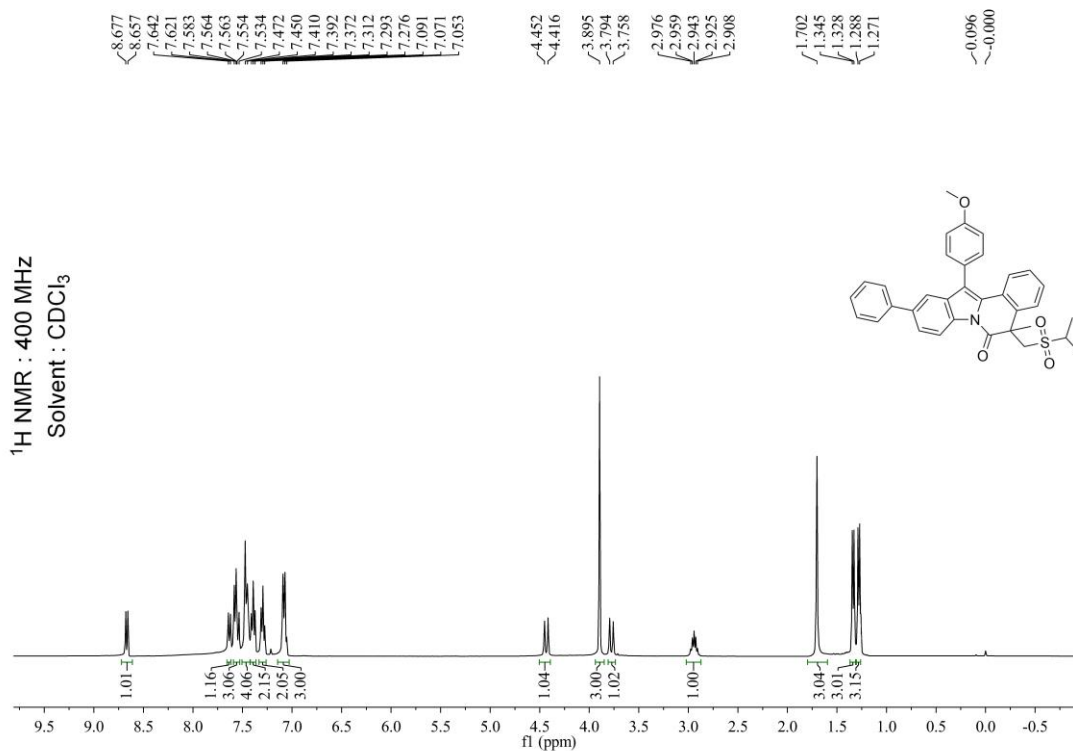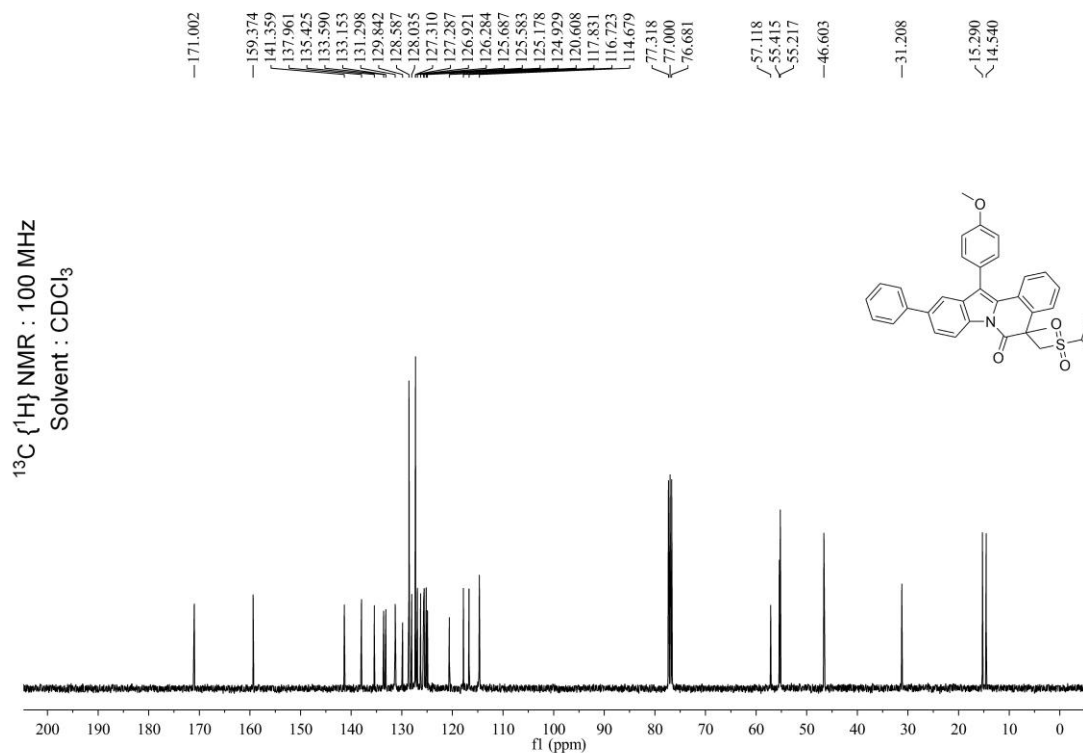

**5-((isopropylsulfonyl)methyl)-12-(4-methoxyphenyl)-5,9-dimethylindolo[2,1-a]isoquinolin-6-(5H)-one (3ra) and 5-((isopropylsulfonyl)methyl)-12-(4-methoxyphenyl)-5,11-dimethylindolo[2,1-a]isoquinolin-6-(5H)-one (3ra') mixture.**

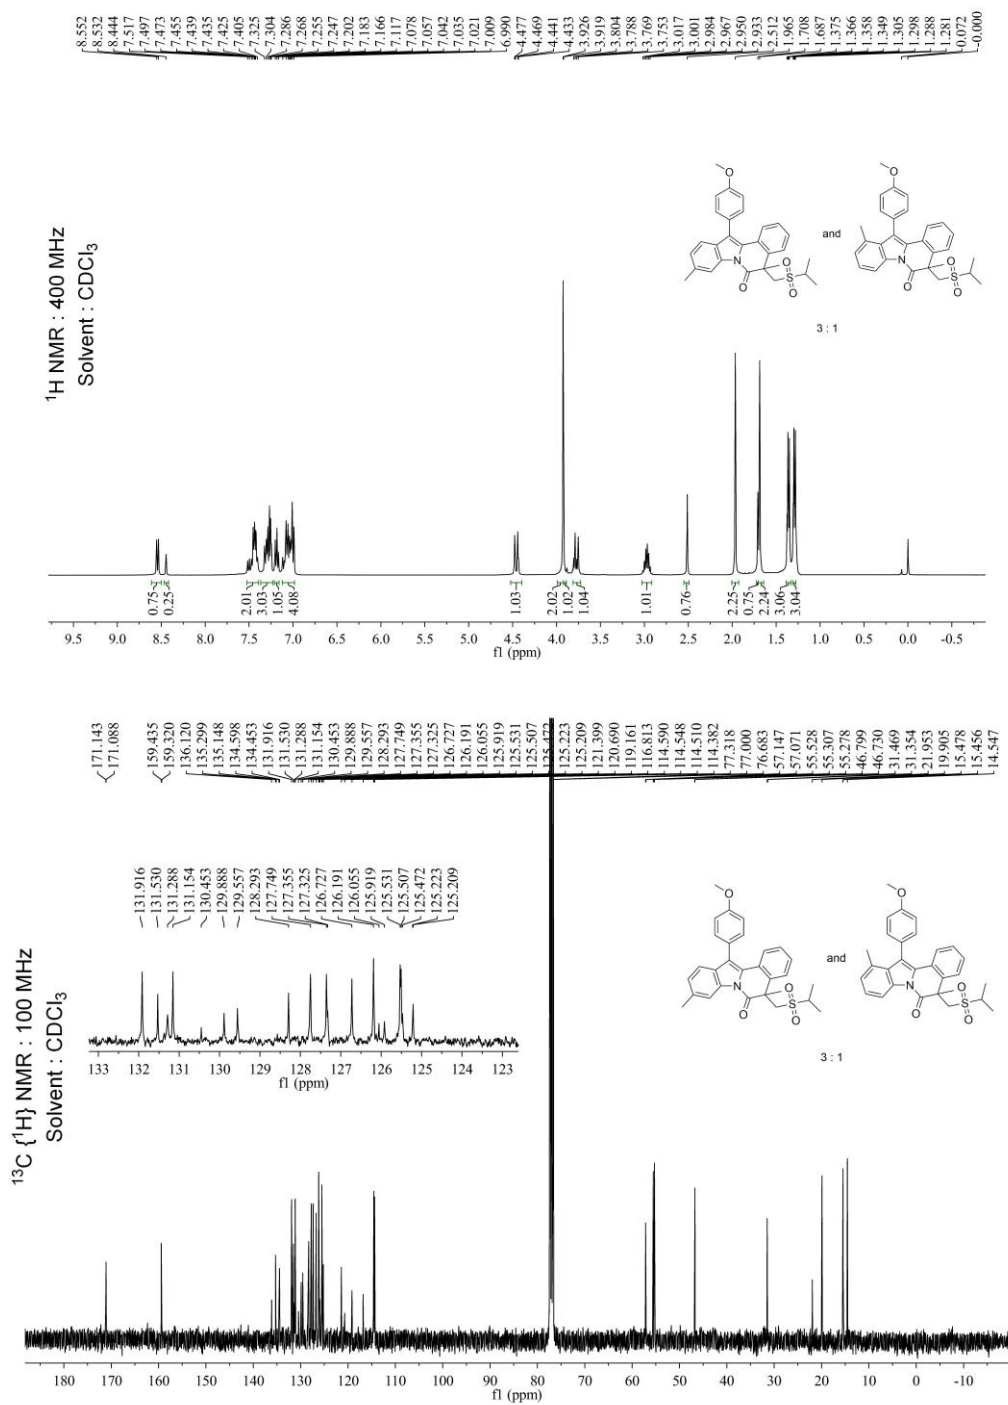

**5-((isopropylsulfonyl)methyl)-12-(4-methoxyphenyl)-5,8-dimethylindolo[2,1-a]isoquinolin-6-(5H)-one (3sa)**

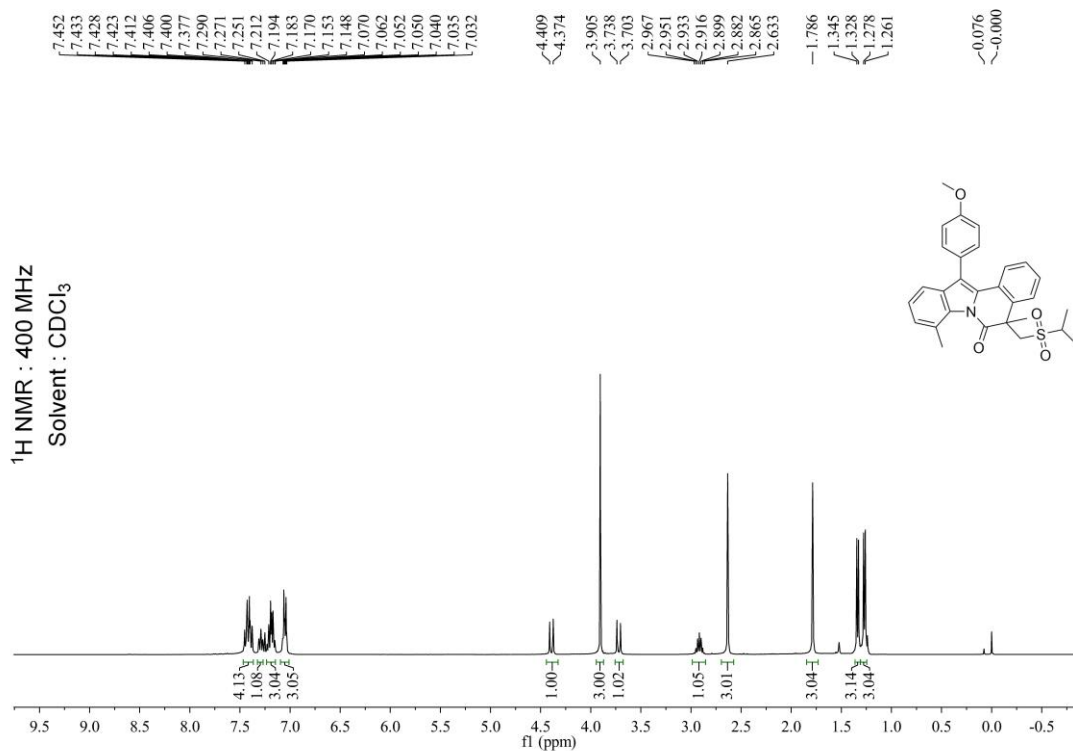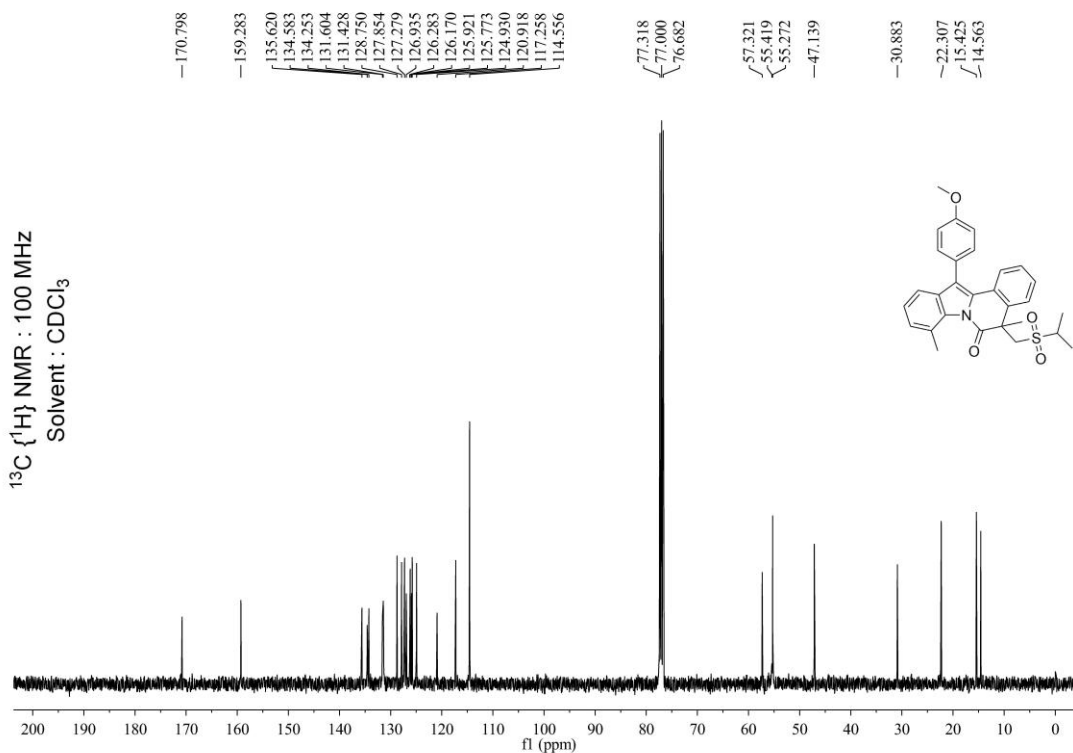

**5-((isopropylsulfonyl)methyl)-12-(4-methoxyphenyl)-5-phenylindolo[2,1-a]isoquinolin-6-(5H)-one (3ta)**

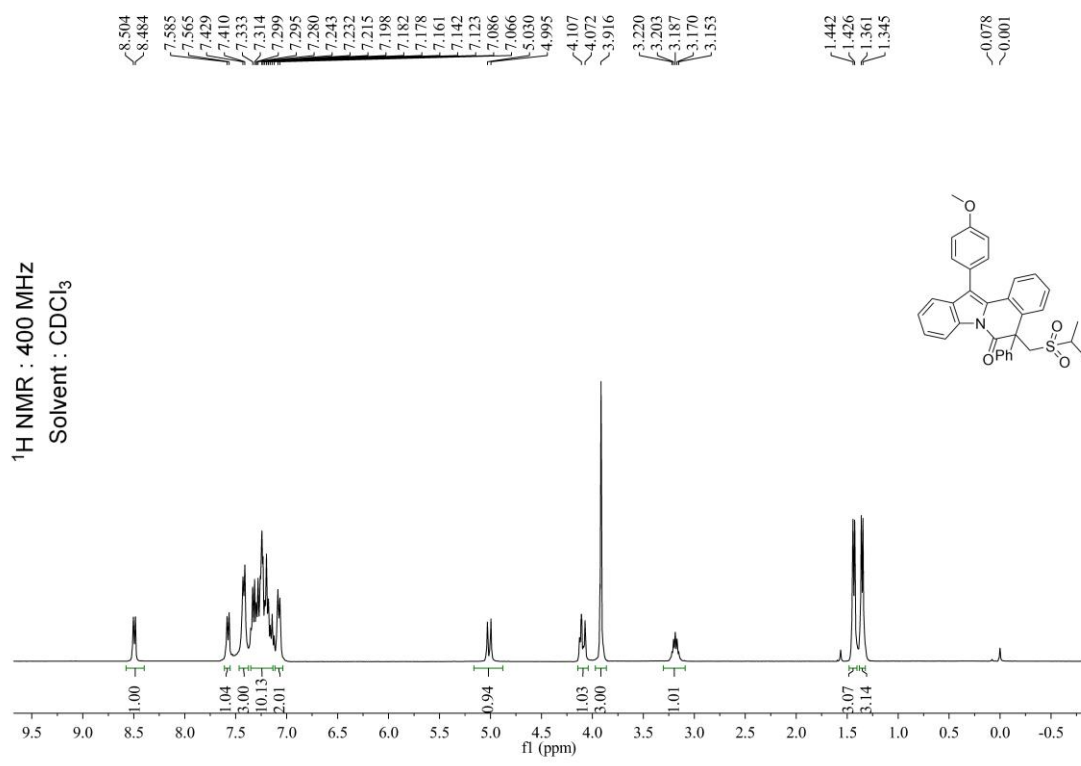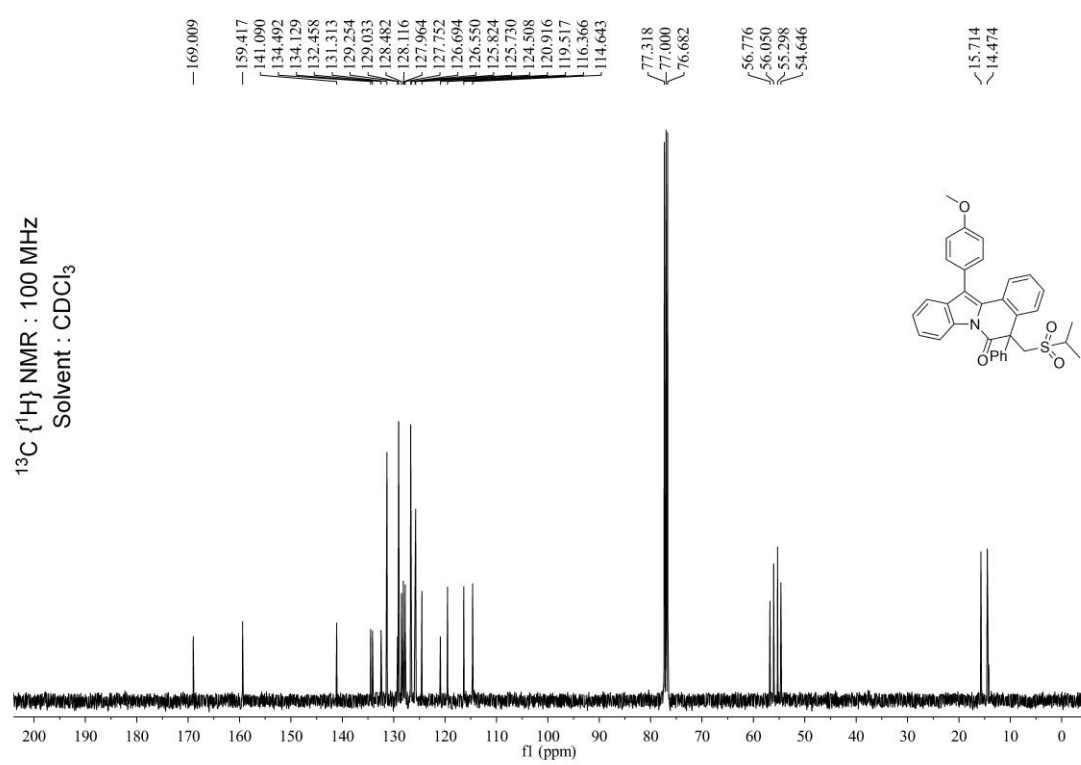

**5-((ethylsulfonyl)methyl)-12-(4-methoxyphenyl)-5-methylindolo[2,1-a]isoquinolin-6-(5H)-one (3ab)**

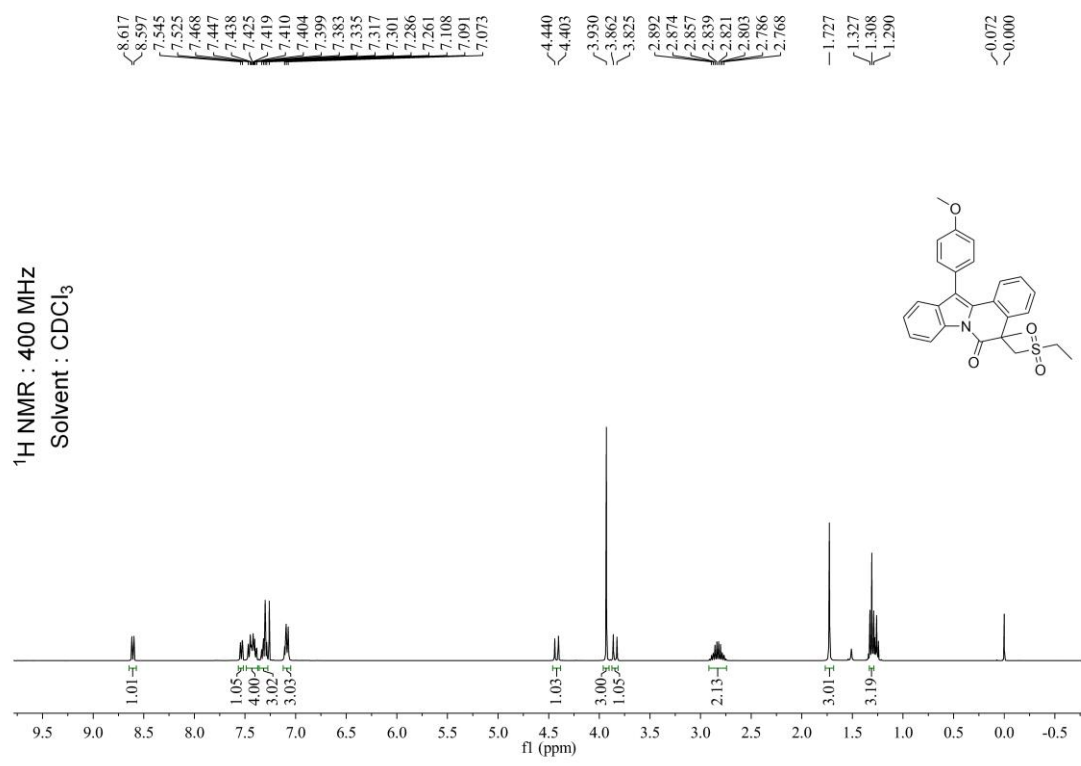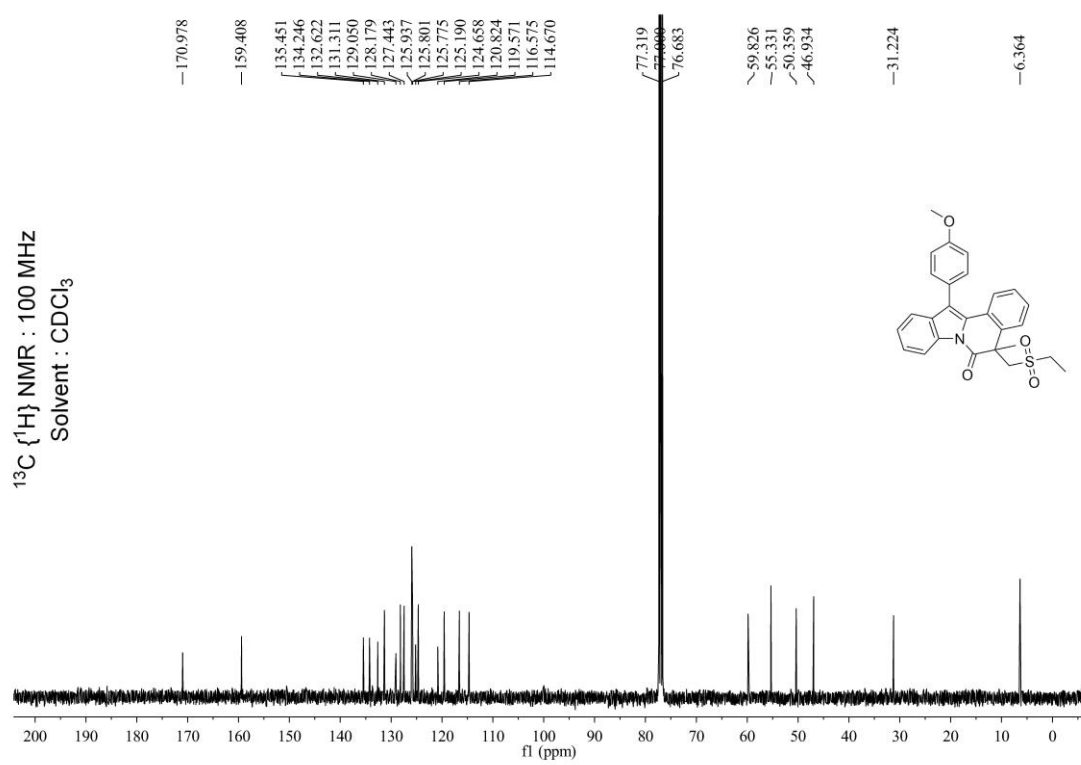



**12-(4-methoxyphenyl)-5-methyl-5-  
((propylsulfonyl)methyl)indolo[2,1-a]isoquinolin-6-(5H)-one (3ac)**

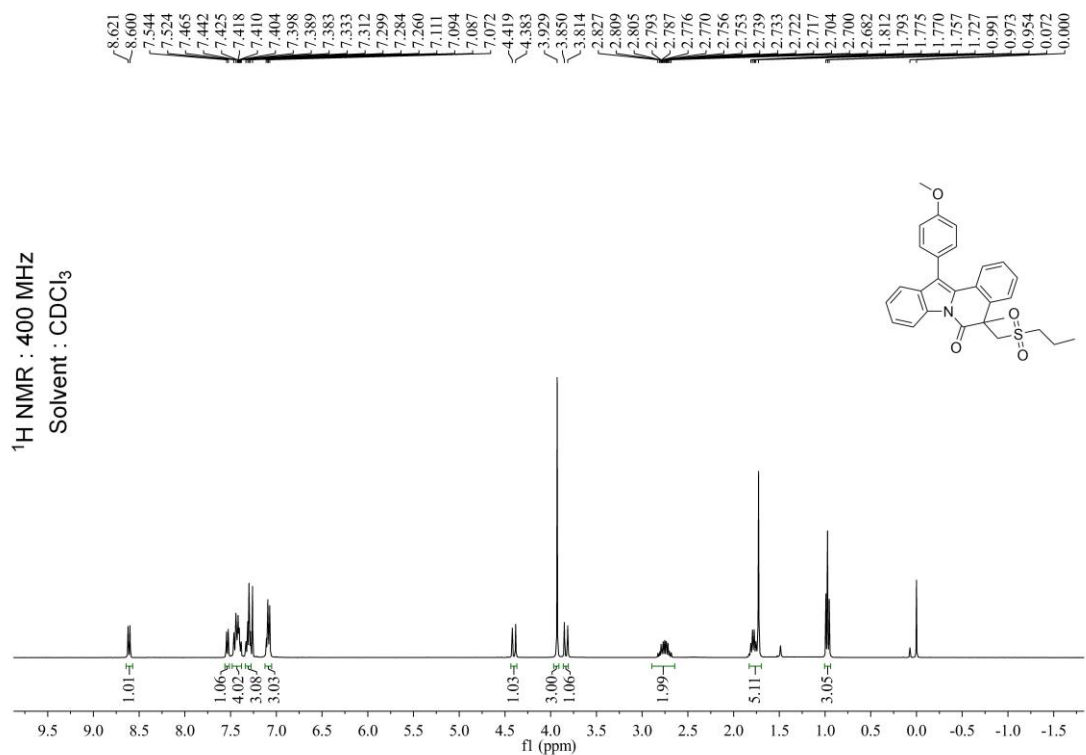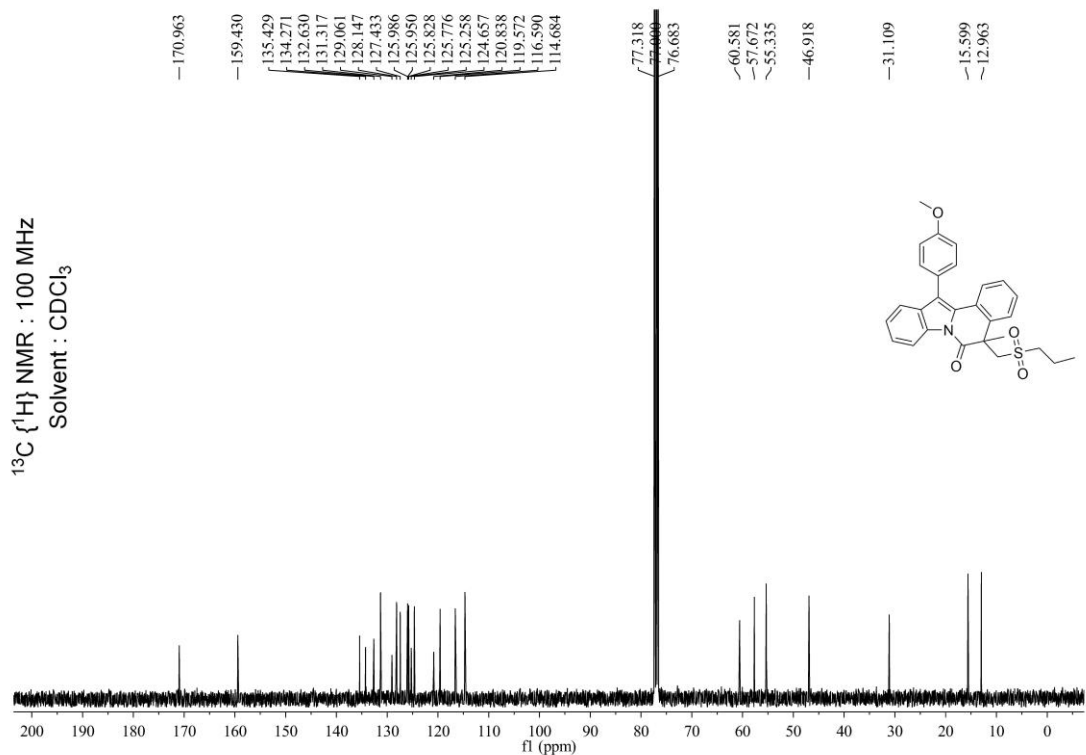

**5-((butylsulfonyl)methyl)-12-(4-methoxyphenyl)-5-methylindolo[2,1-a]isoquinolin-6-(5H)-one (3ad)**

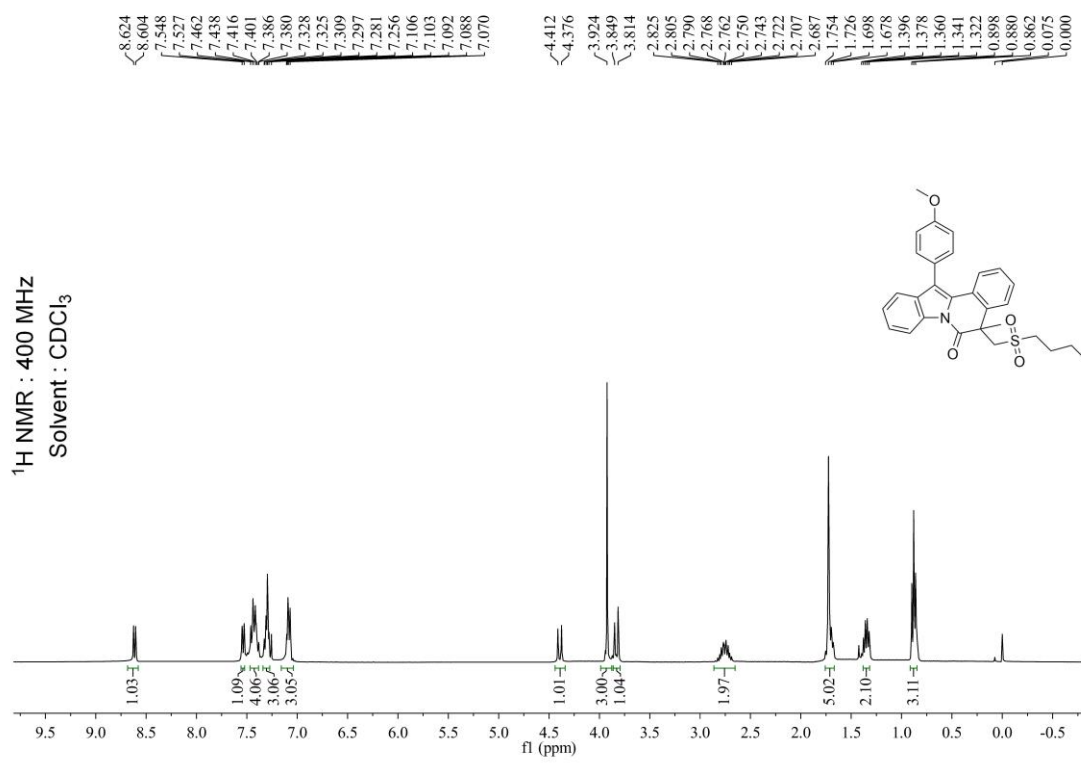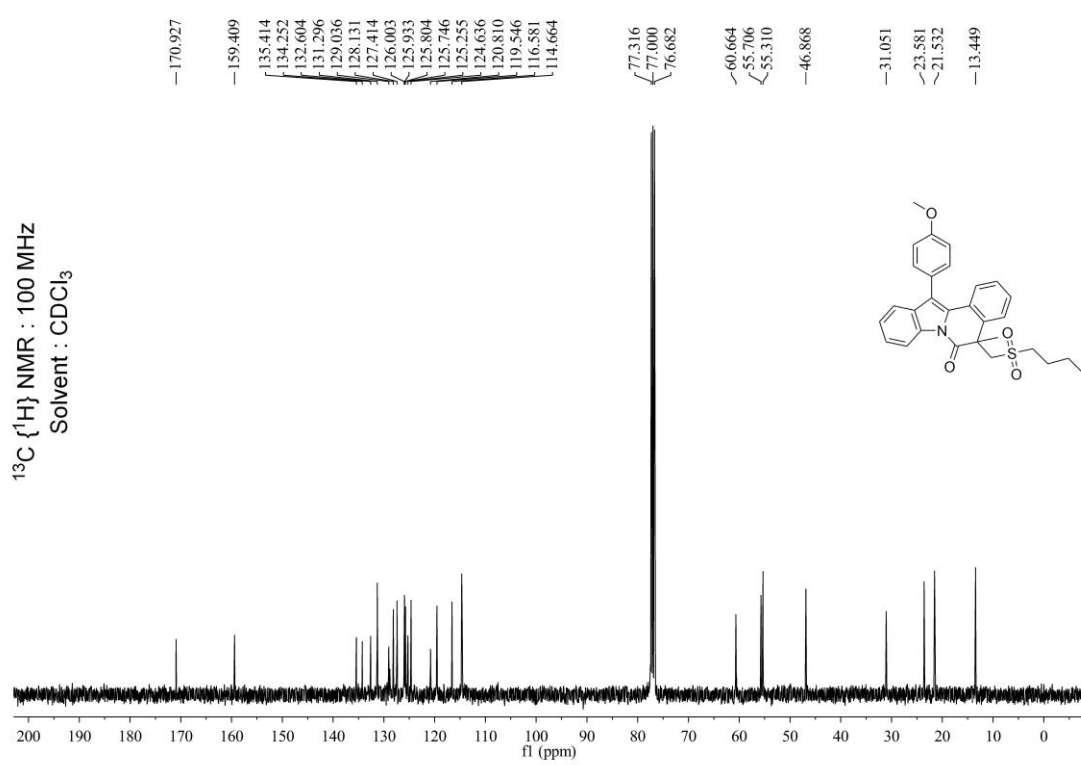

**12-(4-methoxyphenyl)-5-methyl-5-((pentylsulfonyl)methyl)indolo[2,1-a]isoquinolin-6-(5H)-one (3ae)**

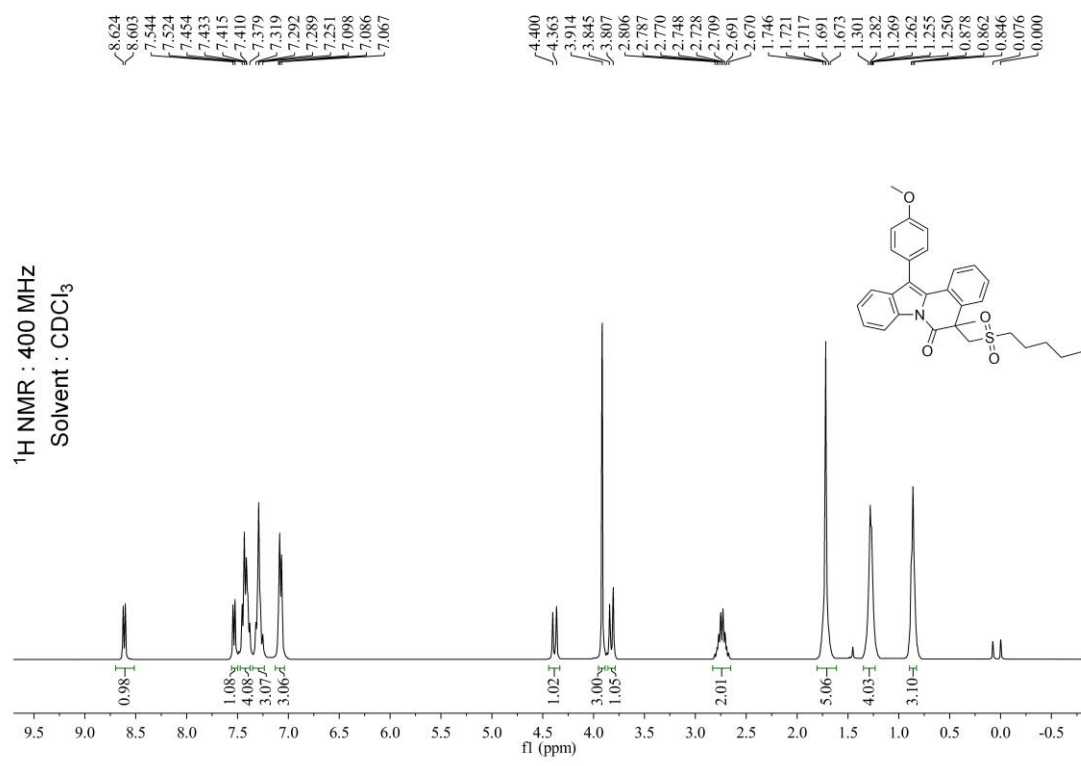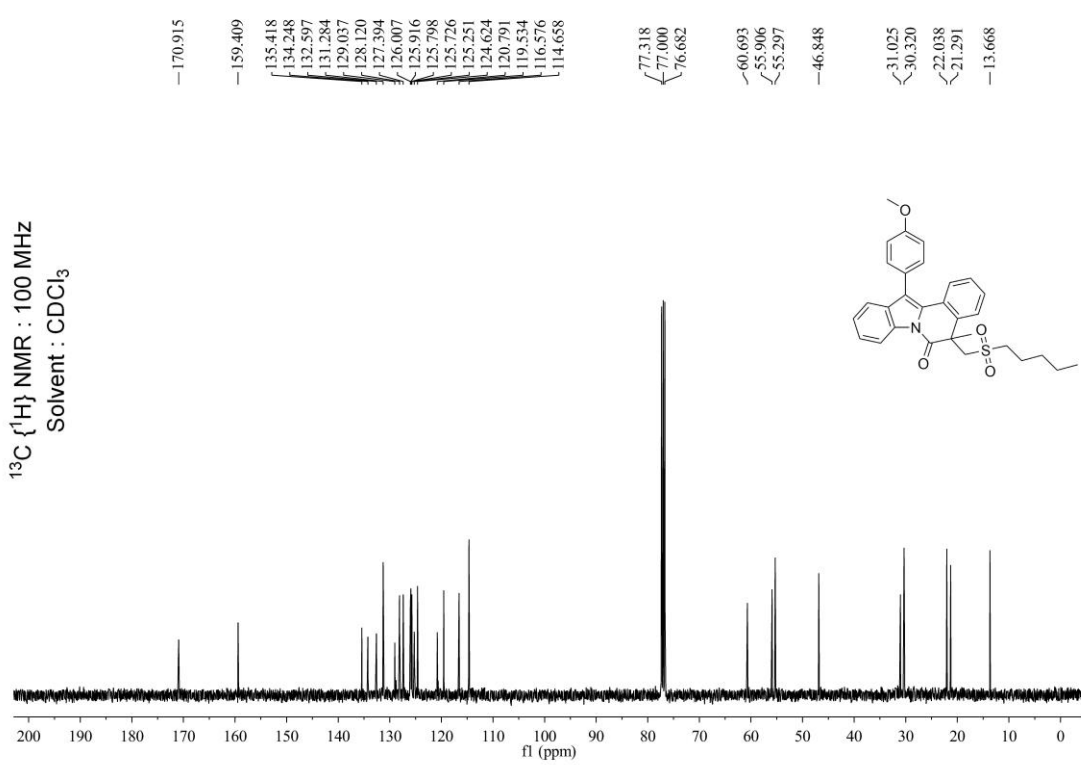

**5-((hexylsulfonyl)methyl)-12-(4-methoxyphenyl)-5-methylindolo[2,1-a]isoquinolin-6-(5H)-one (3af)**

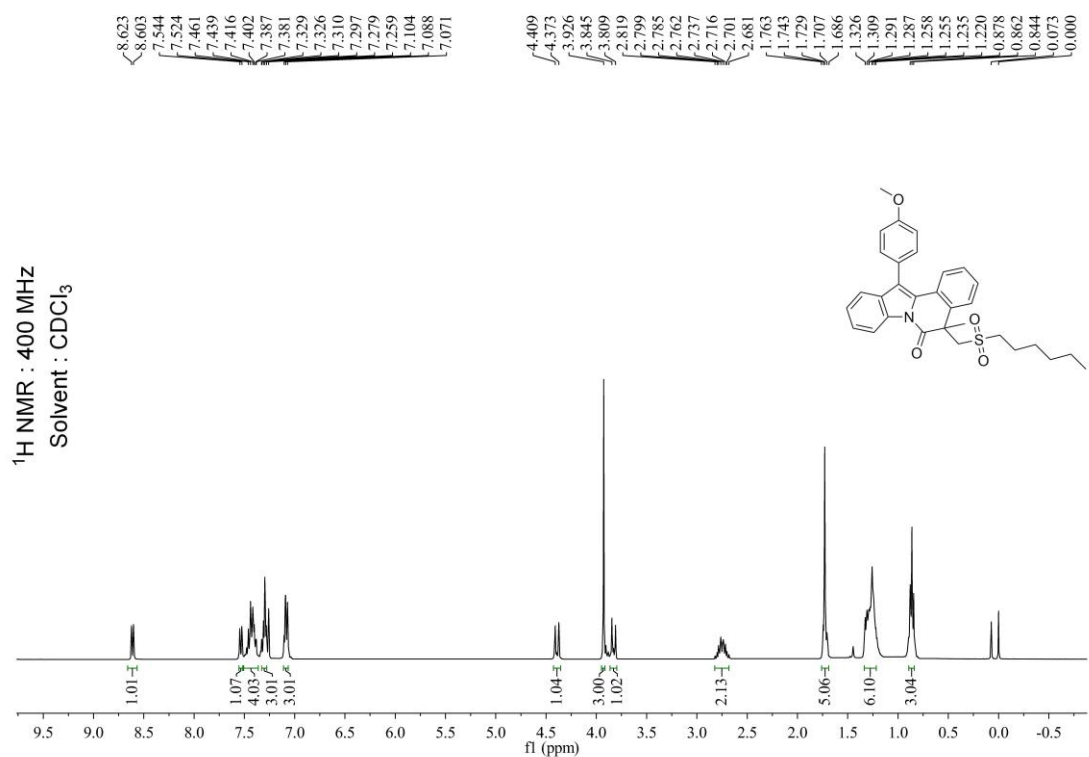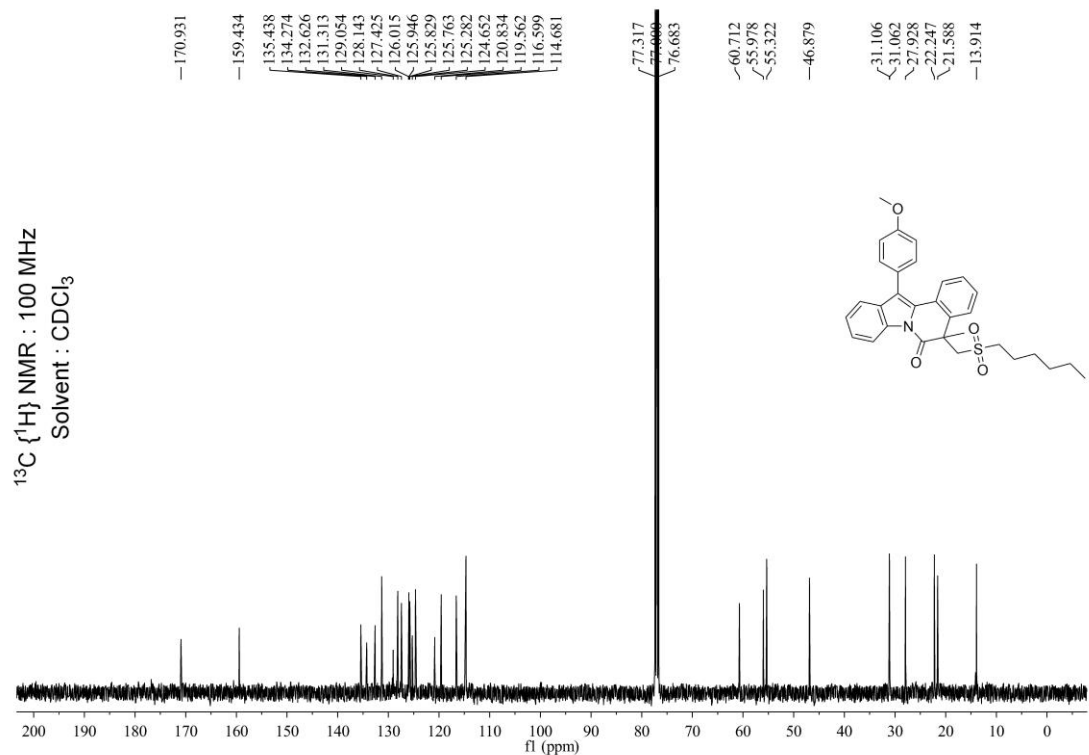

## 12-(4-methoxyphenyl)-5-methyl-5-

## ((phenethylsulfonyl)methyl)indolo[2,1-a]isoquinolin-6-(5H)-one (3ag)

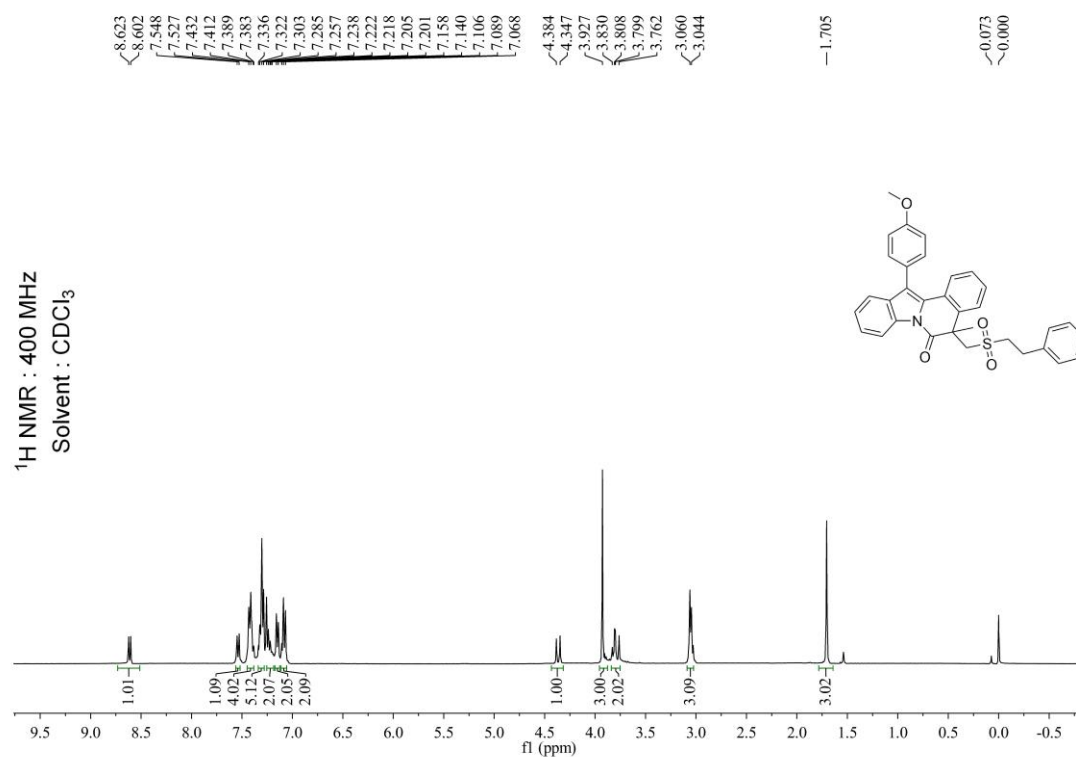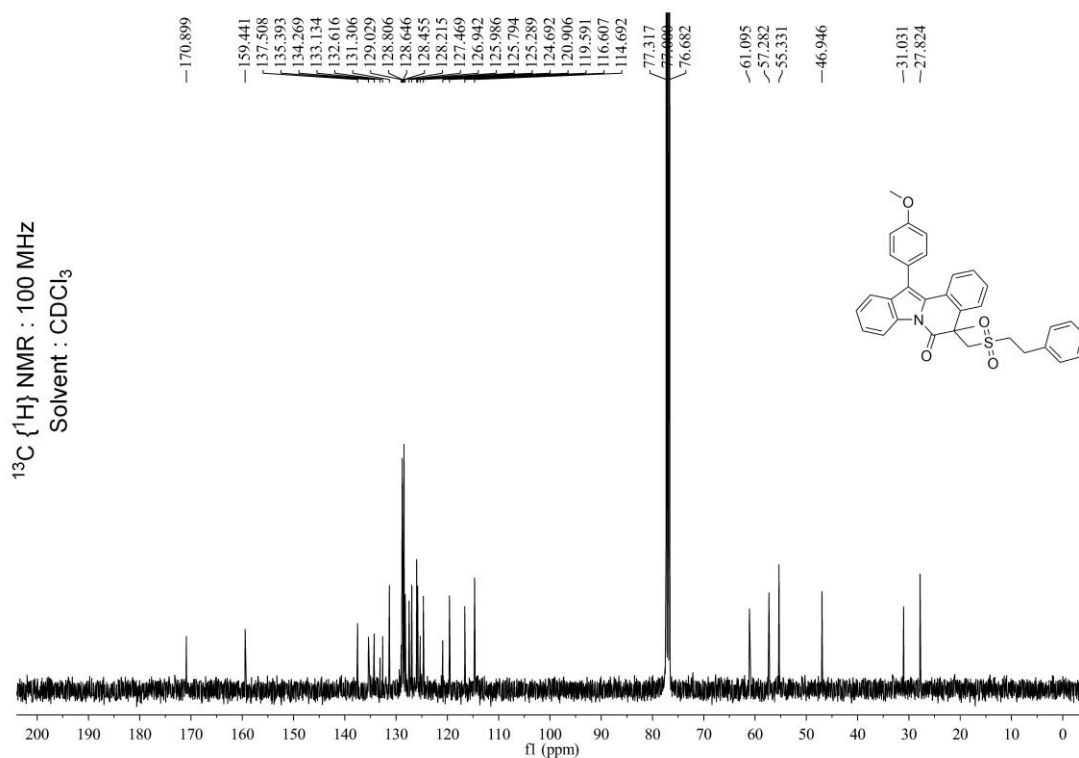

**5-((sec-butylsulfonyl)methyl)-12-(4-methoxyphenyl)-5-methylindolo[2,1-a]isoquinolin-6-(5H)-one (3ah)**

**diastereoisomer mixture:  $dr = 1:1$**

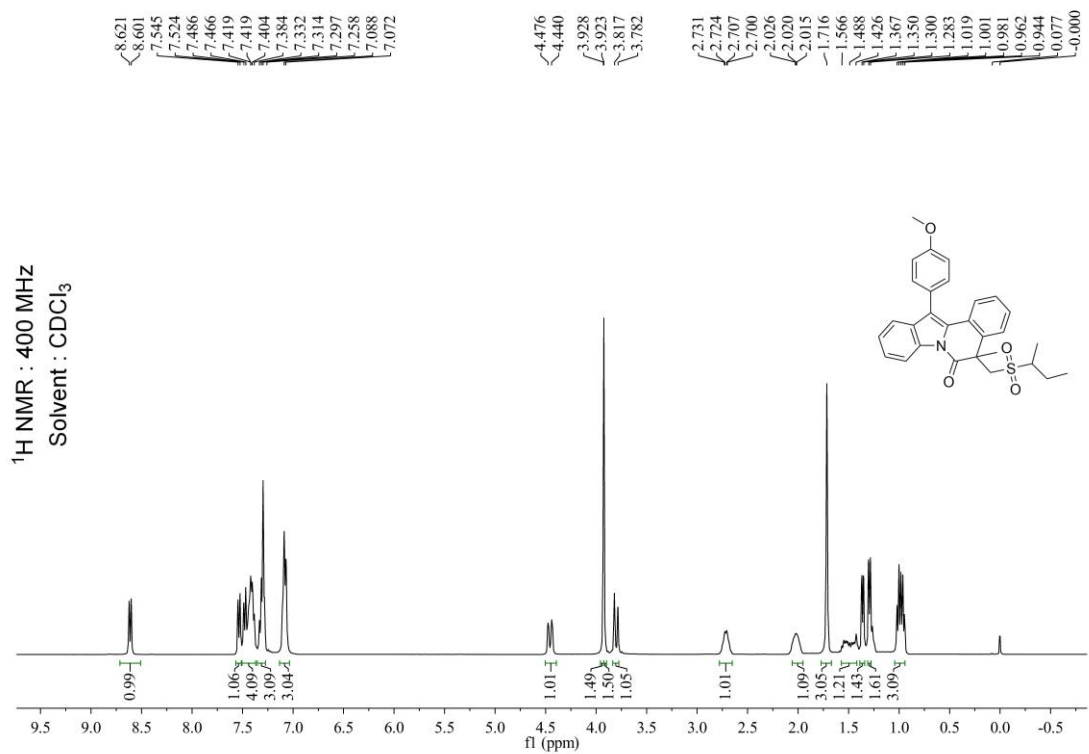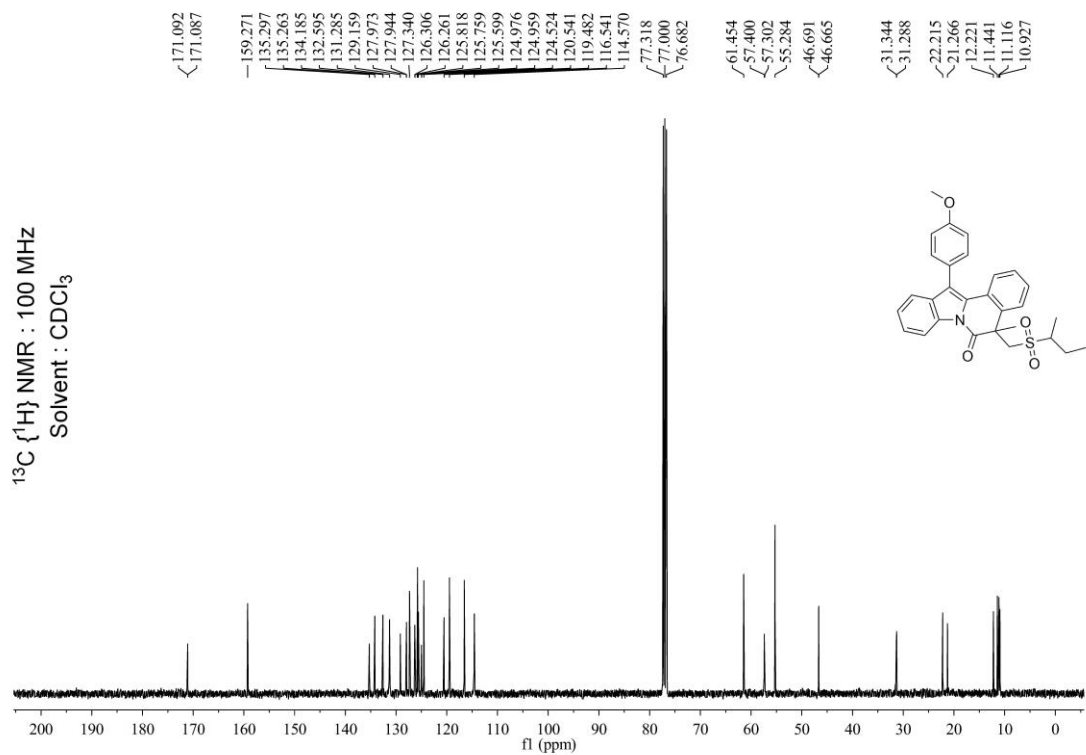

**5-((heptan-3-ylsulfonyl)methyl)-12-(4-methoxyphenyl)-5-methylindolo[2,1-a]isoquinolin-6-(5H)-one (3ai)**

**diastereoisomer mixture:  $dr = 1:1$**

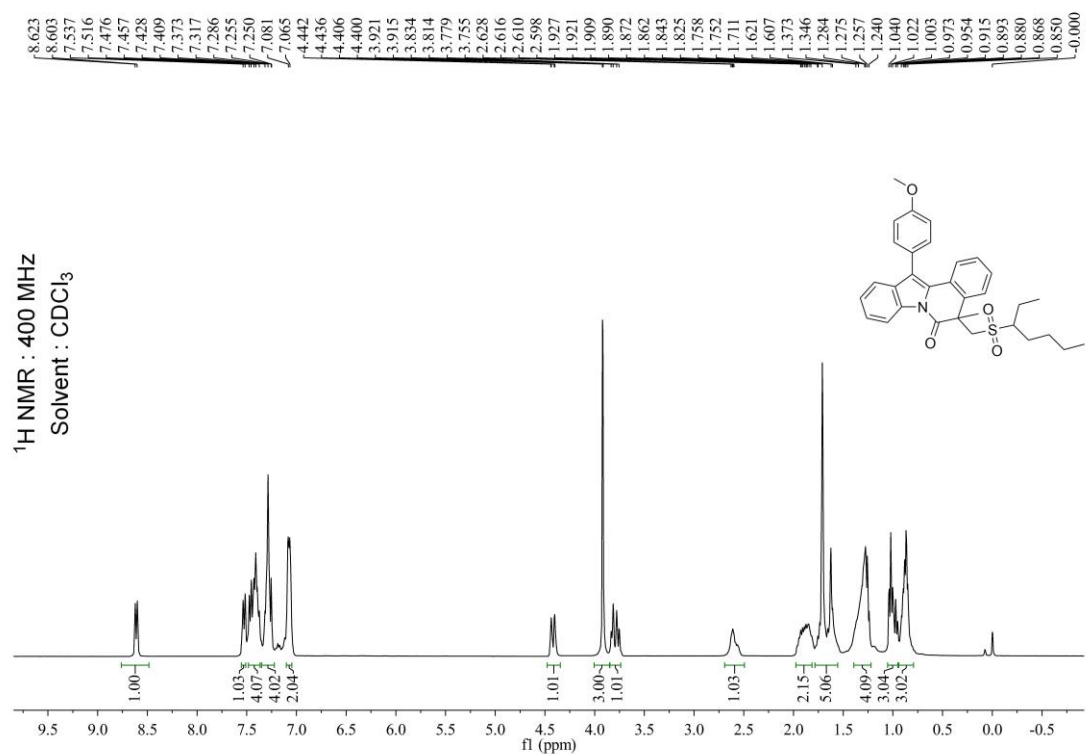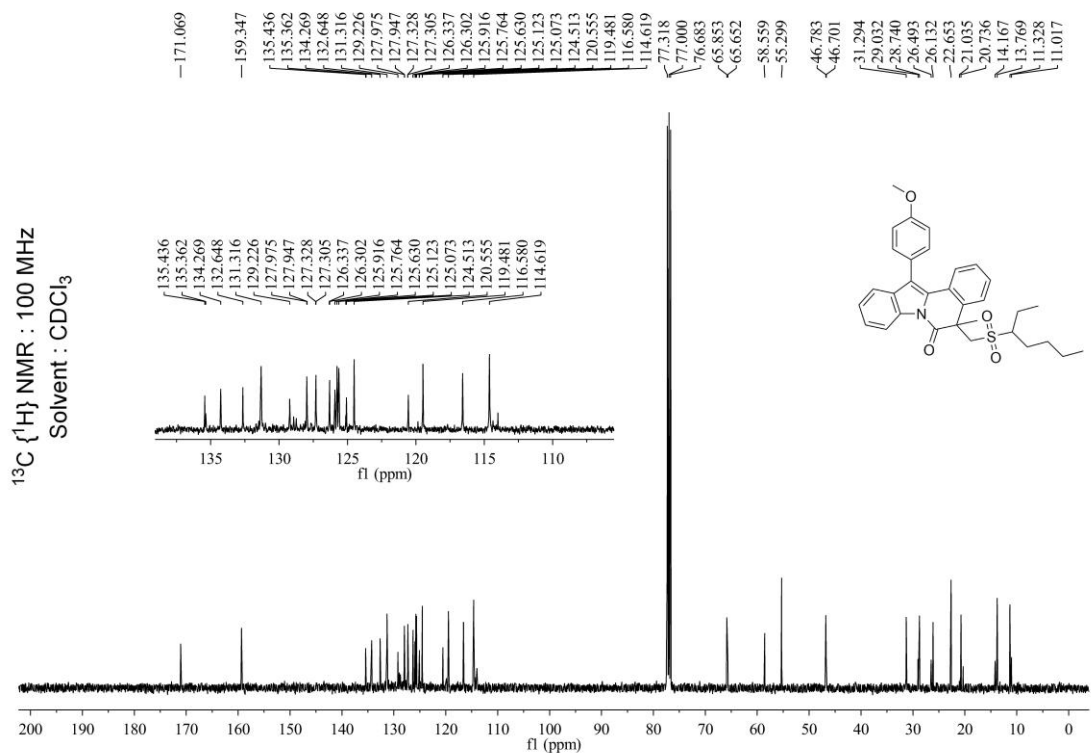

**5-(((1-(benzo[d][1,3]dioxol-5-yl)propan-2-yl)sulfonyl)methyl)-12-(4-methoxyphenyl)-5-methylindolo[2,1-a]isoquinolin-6-(5H)-one (3aj)**

diastereoisomer mixture: *dr* = 3:2

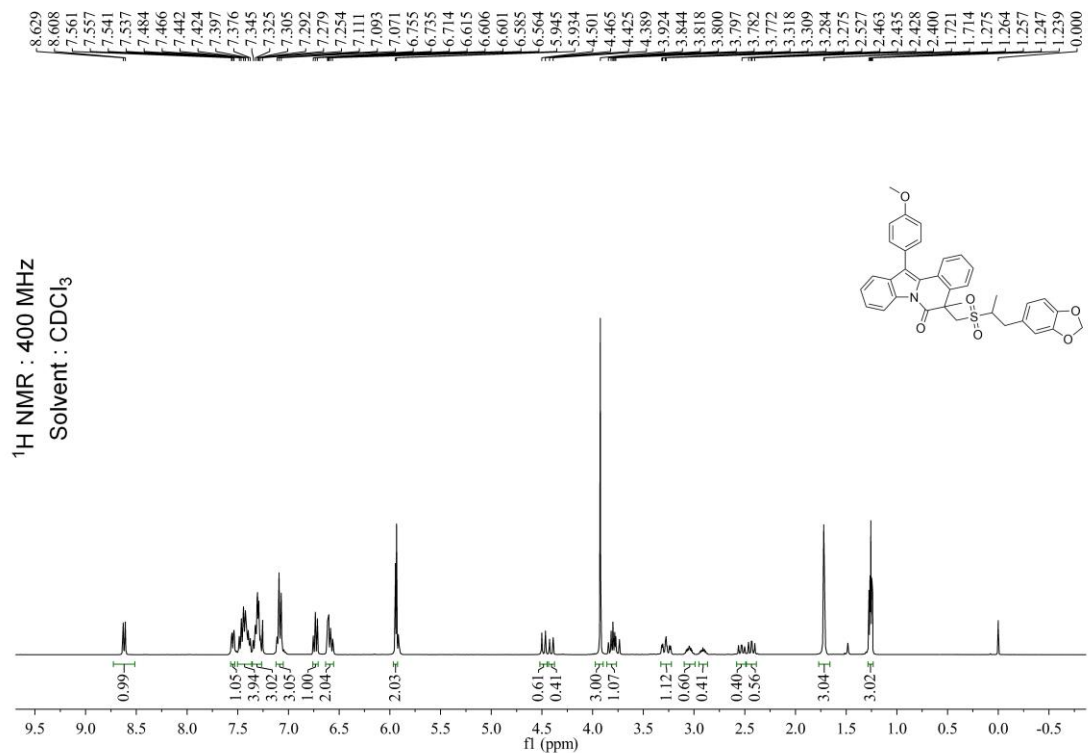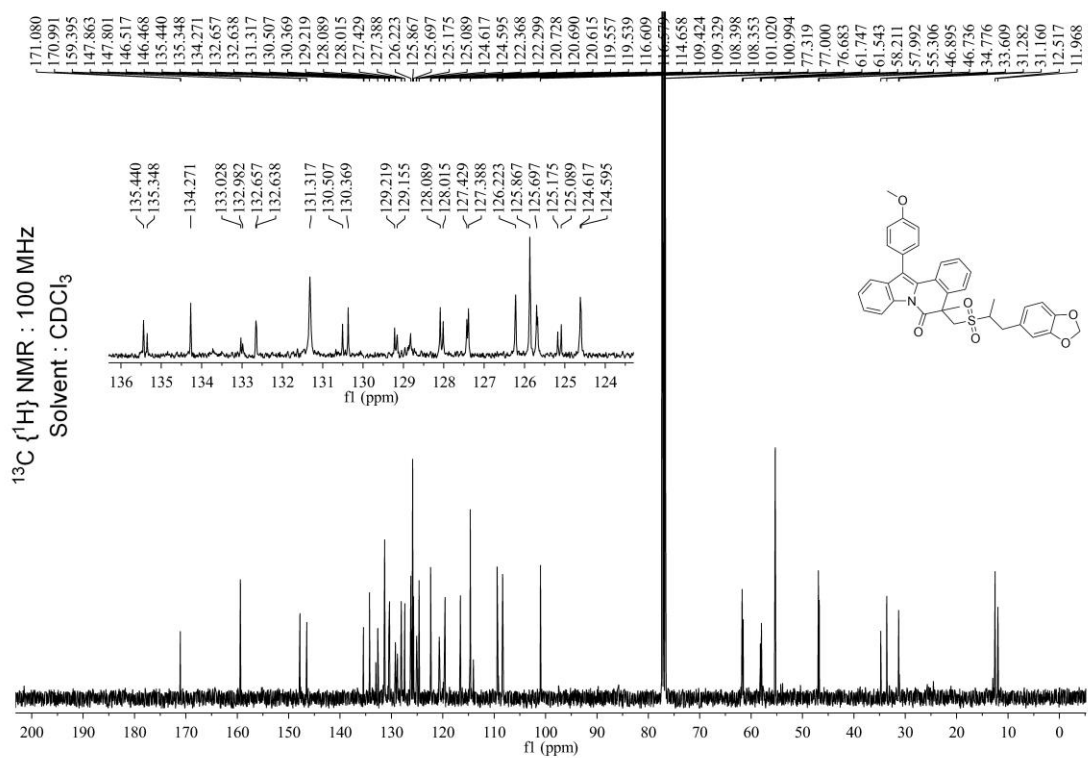



**5-((cyclopentylsulfonyl)methyl)-12-(4-methoxyphenyl)-5-methylindolo[2,1-a]isoquinolin-6-(5H)-one (3ak)**

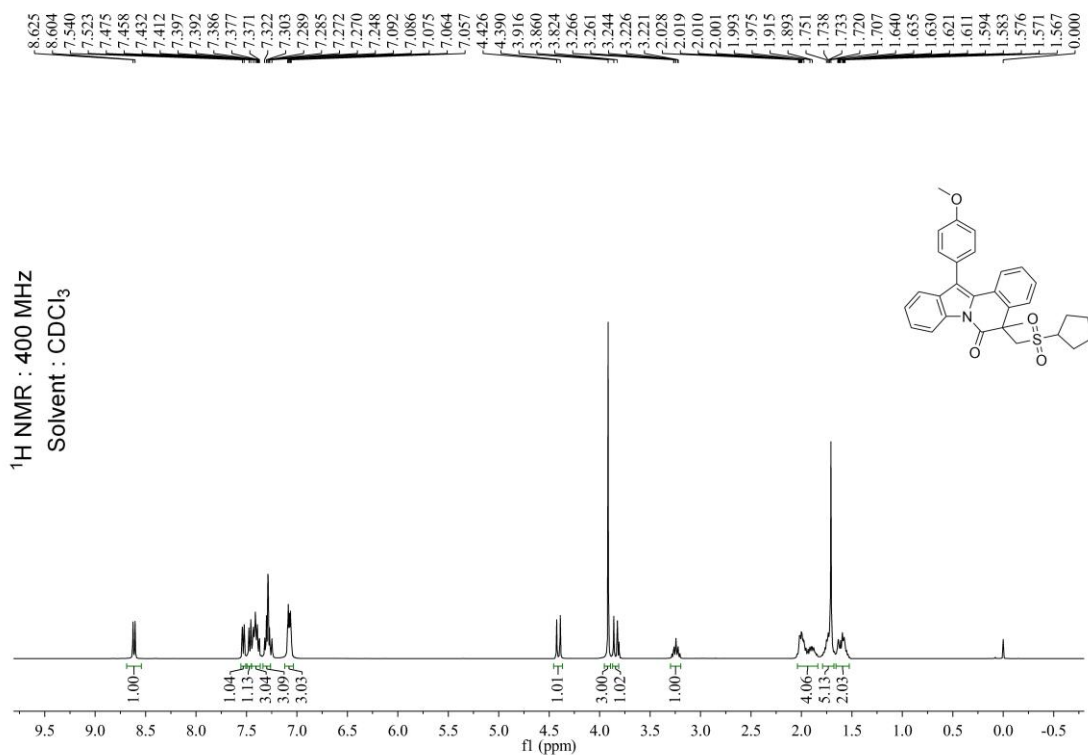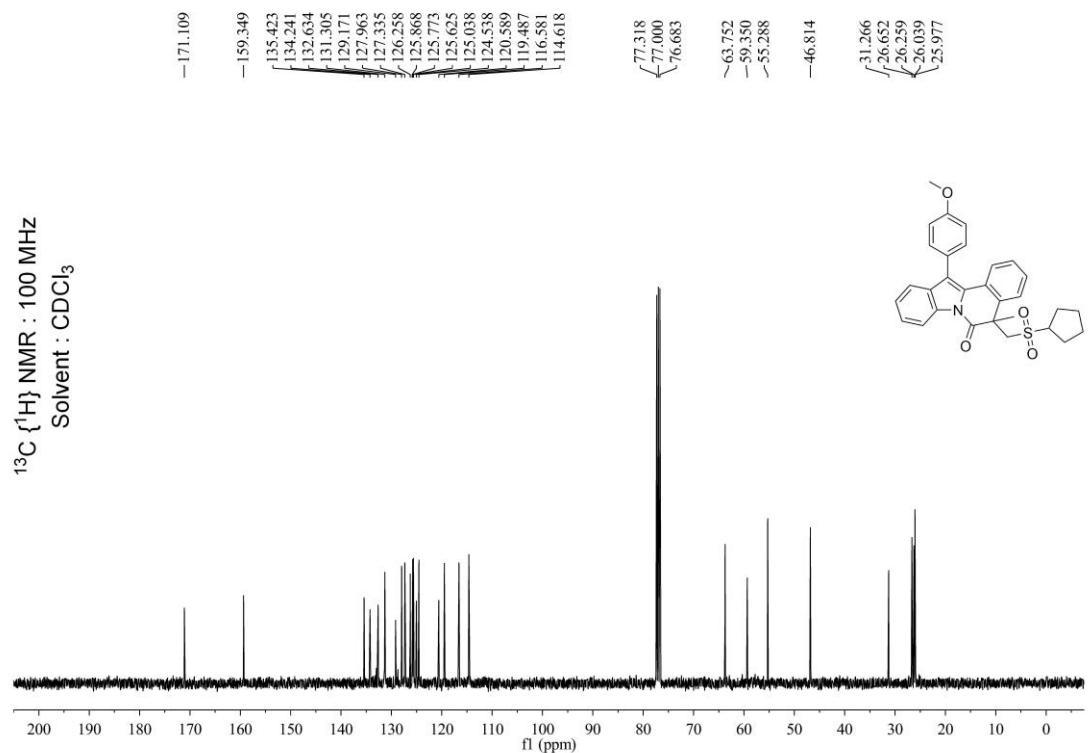

**5-((cyclohexylsulfonyl)methyl)-12-(4-methoxyphenyl)-5-methylindolo[2,1-a]isoquinolin-6-(5H)-one (3al)**

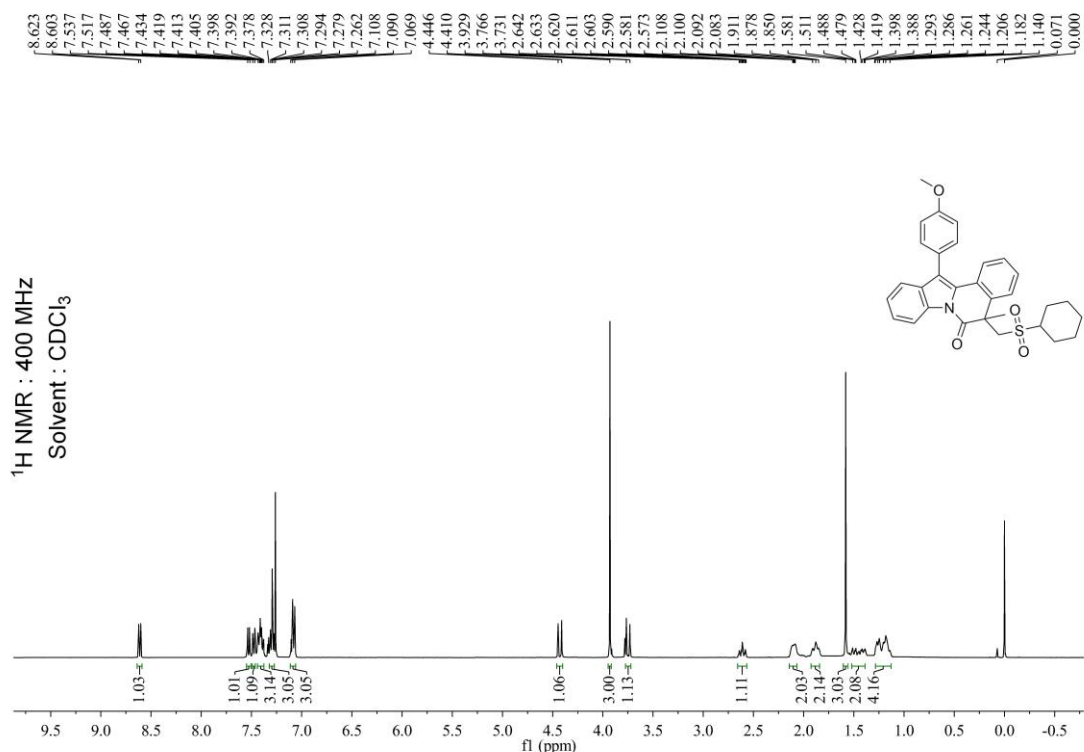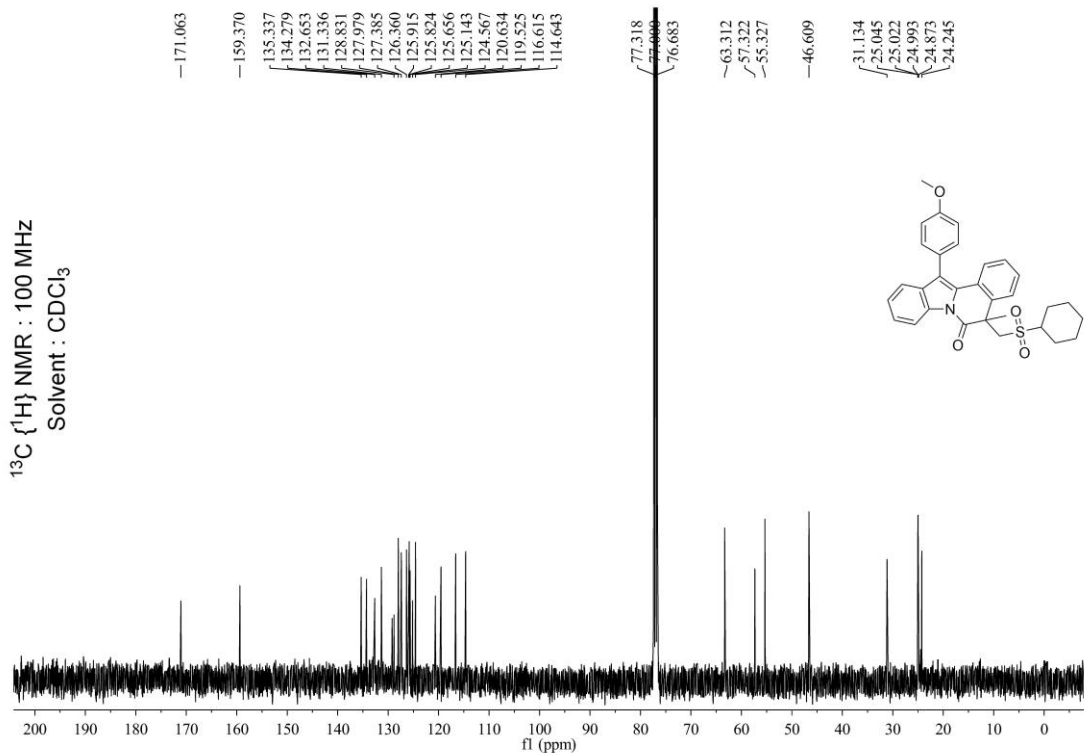

**5-((cyclohex-3-en-1-ylsulfonyl)methyl)-12-(4-methoxyphenyl)-5-methylindolo[2,1-a]isoquinolin-6-(5H)-one (3am)**

diastereoisomer mixture: *dr* = 1:1

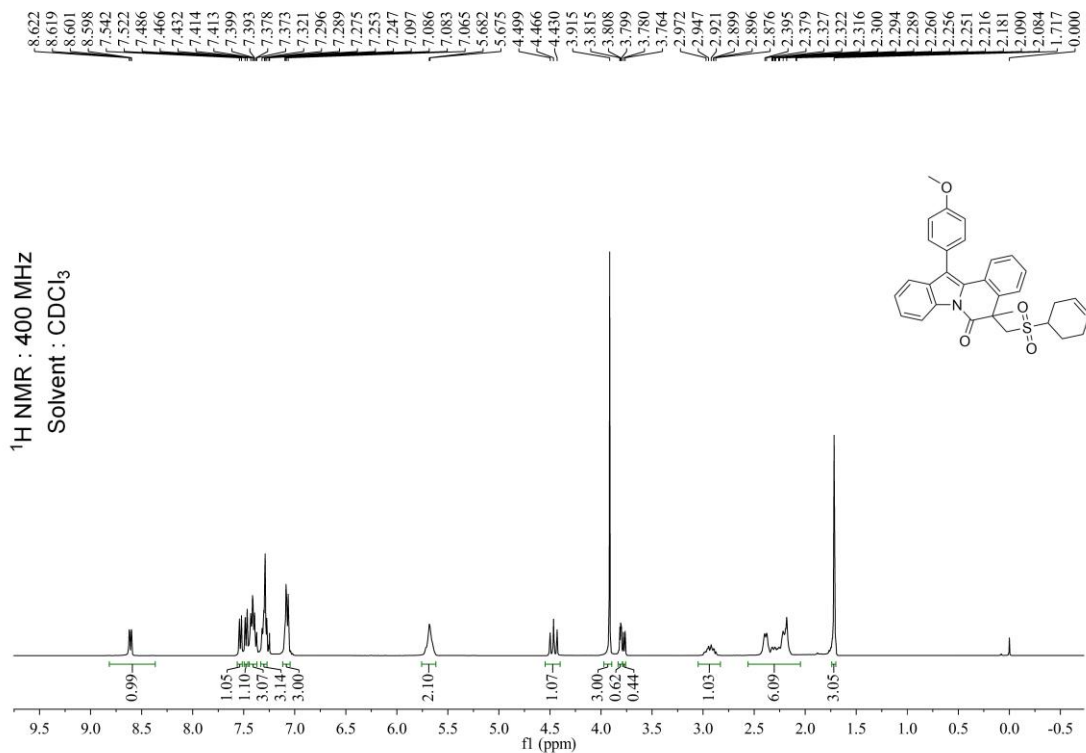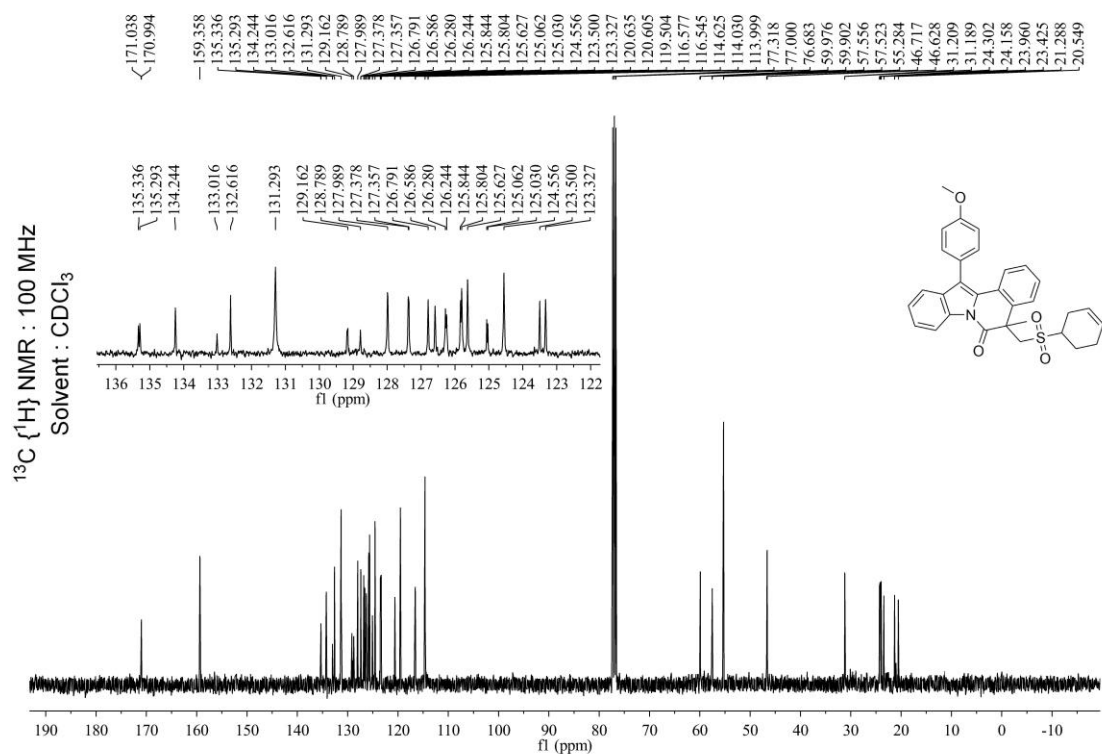

**Tert-butyl-4-(((12-(4-methoxyphenyl)-5-methyl-6-oxo-5,6-dihydroindolo[2,1-a]isoquinolin-5-yl)methyl)sulfonyl)piperidine-1-carboxylate (3an)**

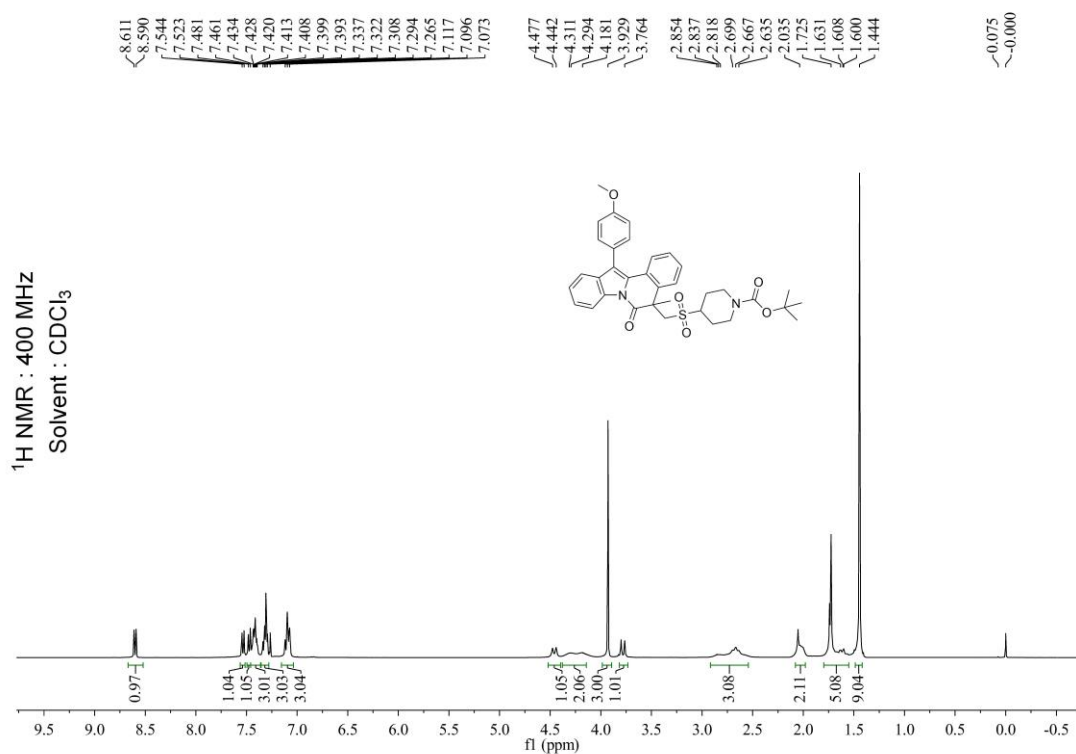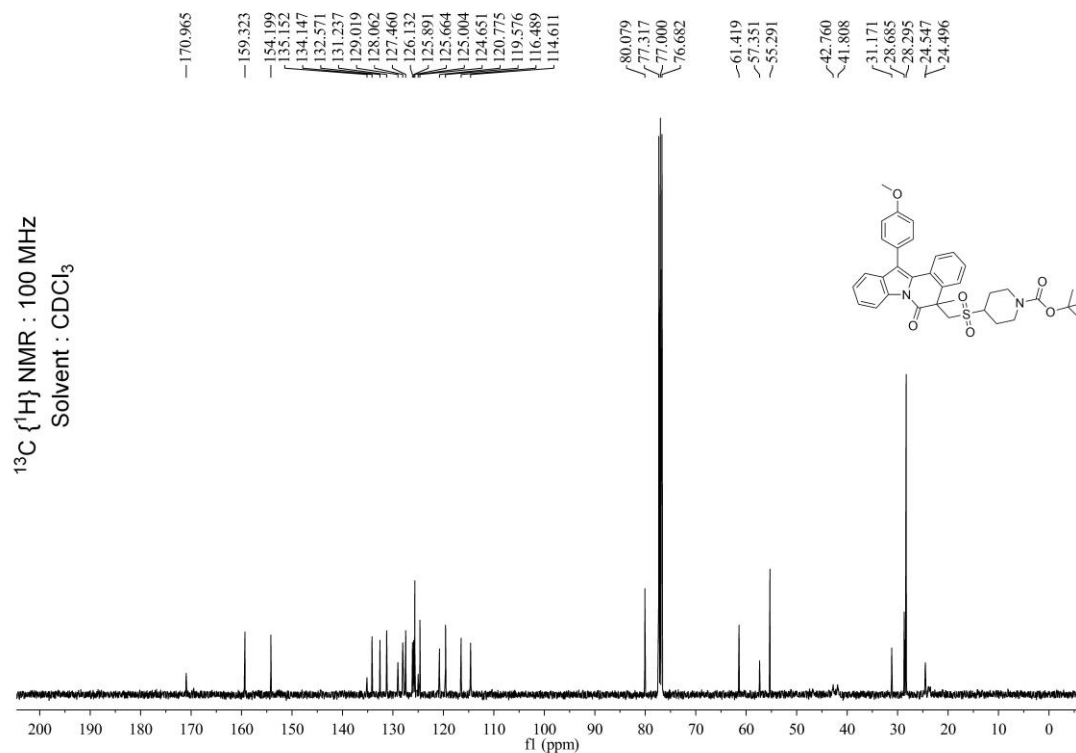

**3-(isopropylsulfonyl)-2-(2-((4-methoxyphenyl)ethynyl)phenyl)-2-methyl-N-pentylpropanamide (4ua)**

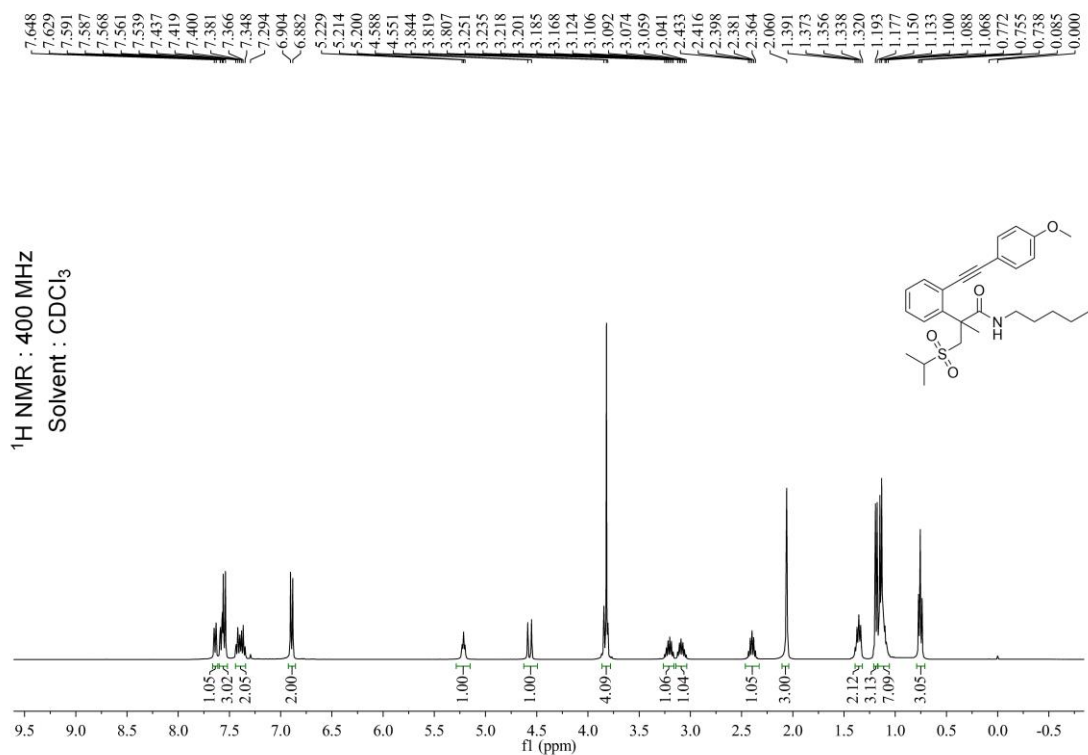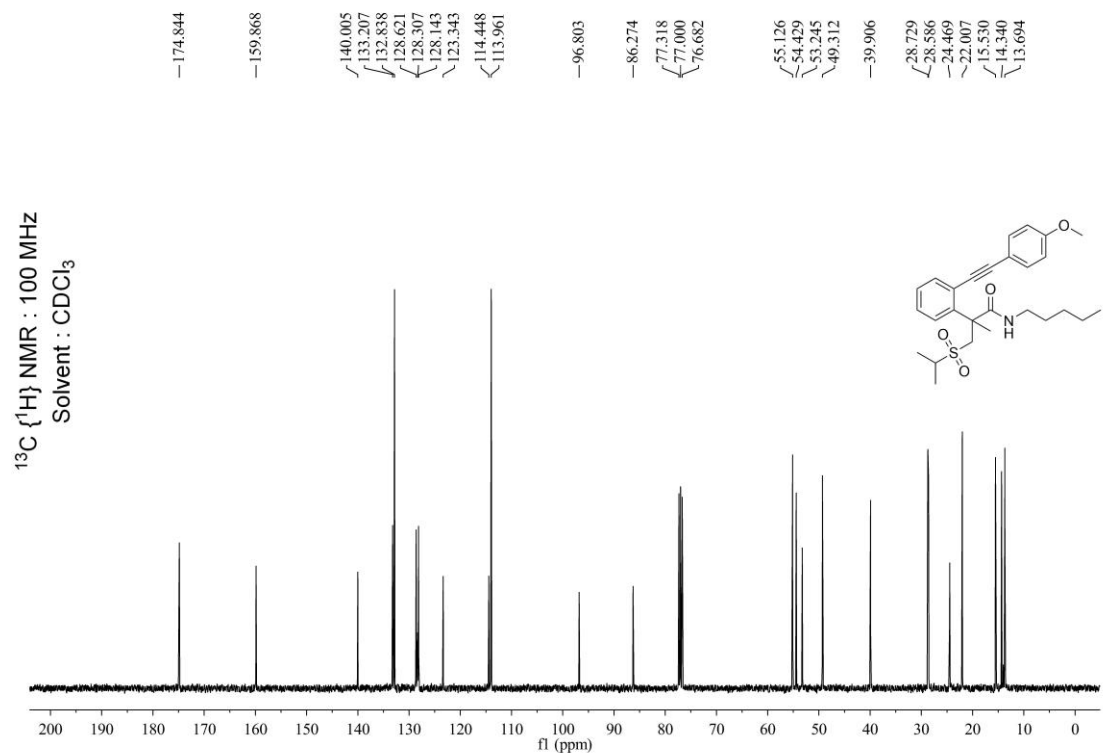

**3-(isopropylsulfonyl)-2-(2-((4-methoxyphenyl)ethynyl)phenyl)-2-methyl-N-phenethylpropanamide (4va)**

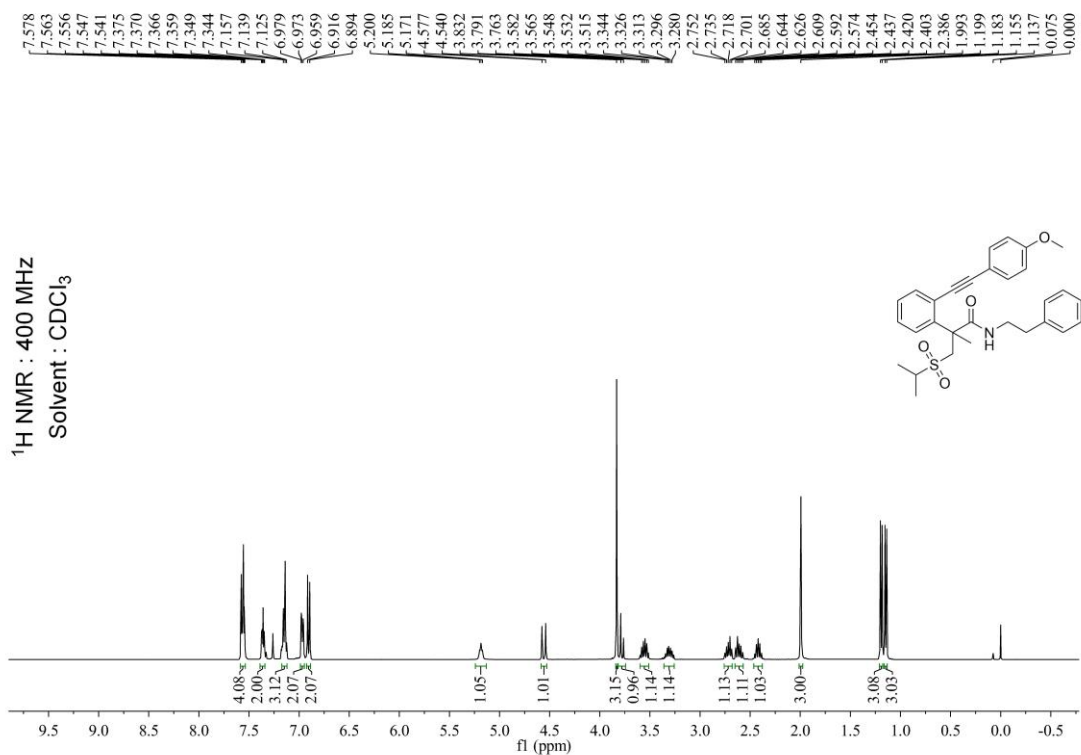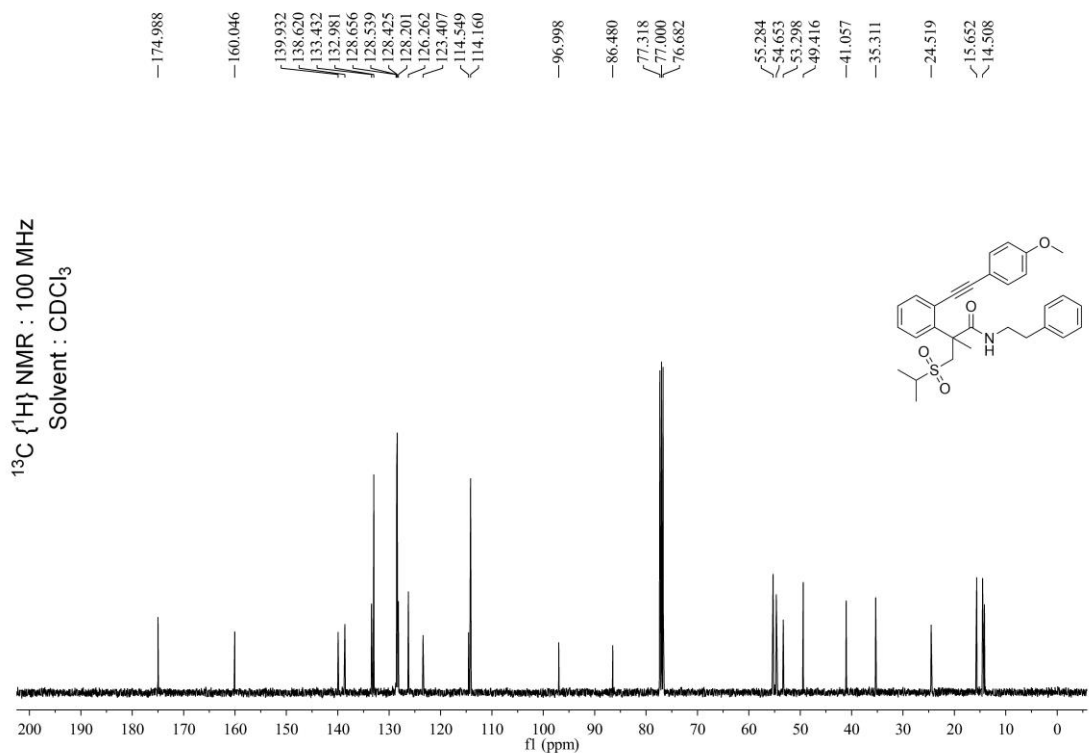

***N*-(3,3-diphenylpropyl)-3-(isopropylsulfonyl)-2-(2-(4-methoxyphenyl)ethynyl)phenyl)-2-methylpropanamide (4wa)**

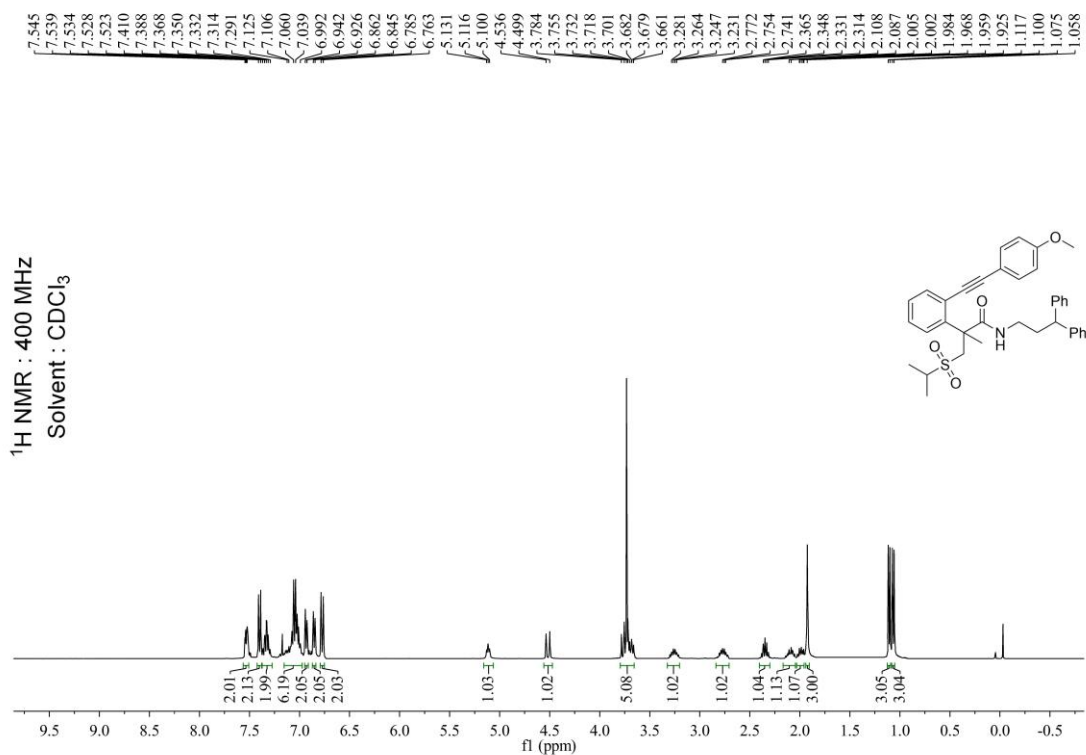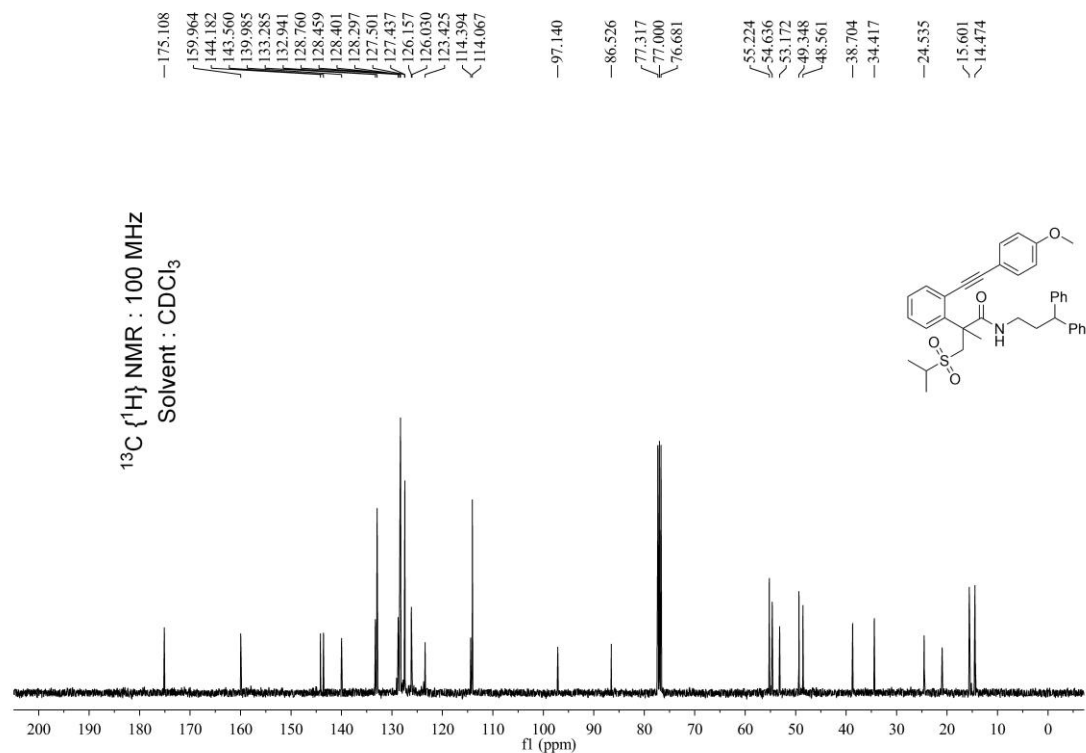

**5-((isopropylsulfonyl)methyl)-12-(4-methoxyphenyl)-5-methylindolo[2,1-a]isoquinolin-6-(5H)-one (4xa)**

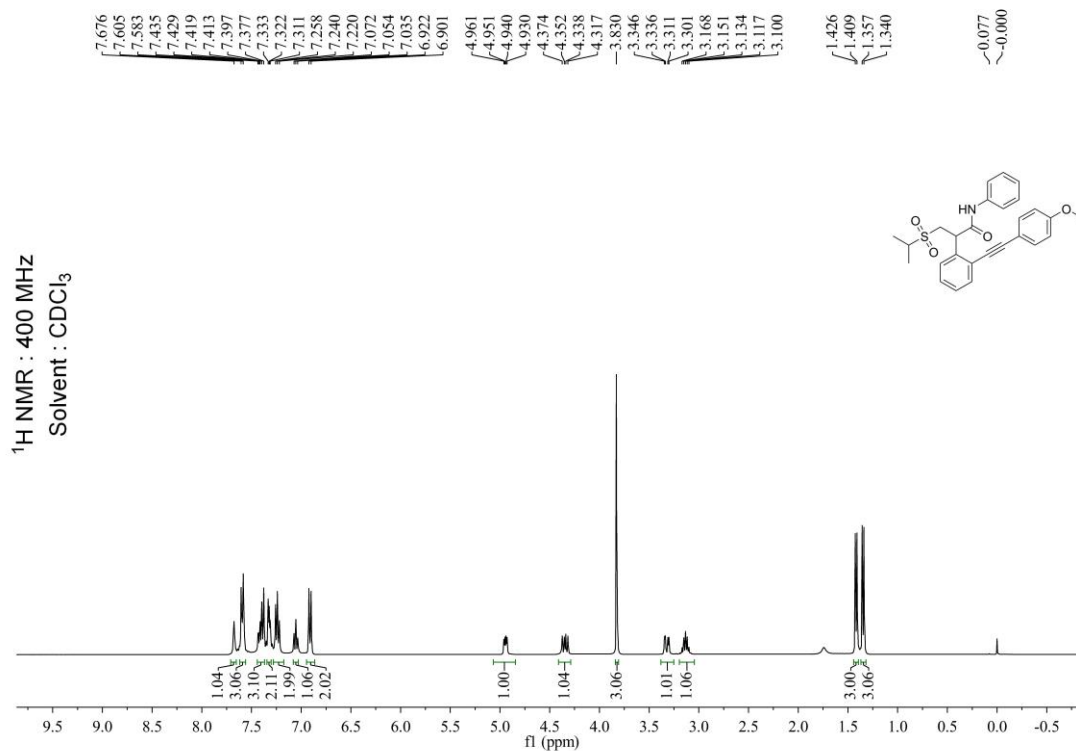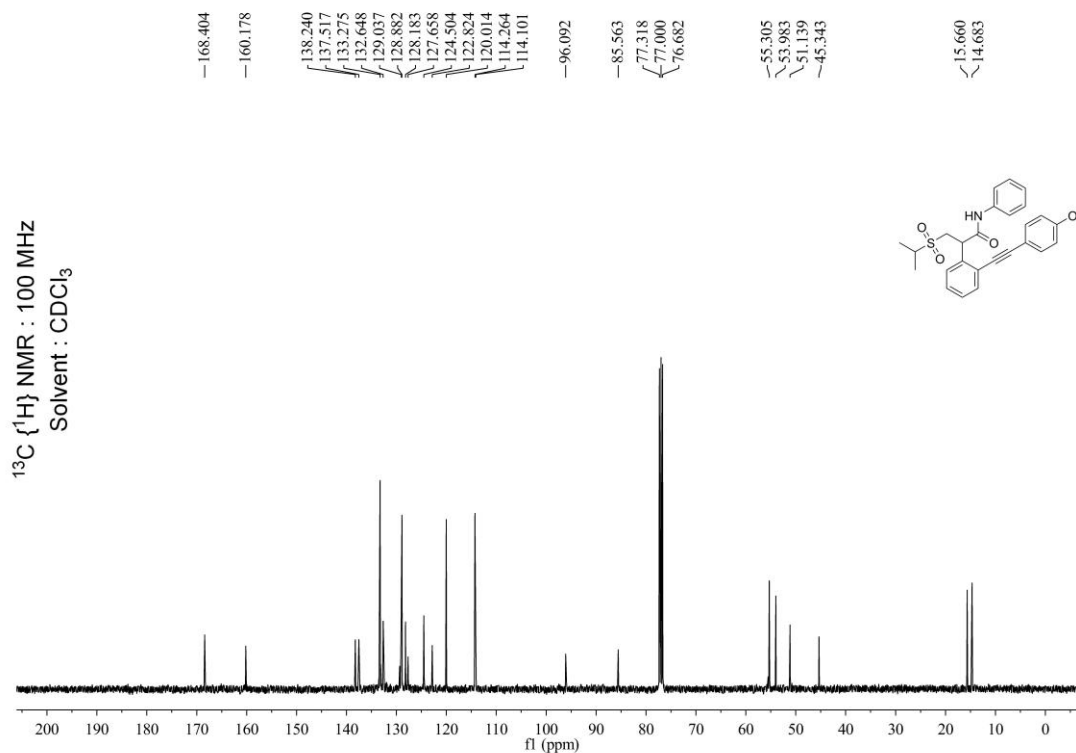



**2-(2-(hex-1-yn-1-yl)phenyl)-3-(isopropylsulfonyl)-2-methyl-N-phenylpropanamide(4ya)**

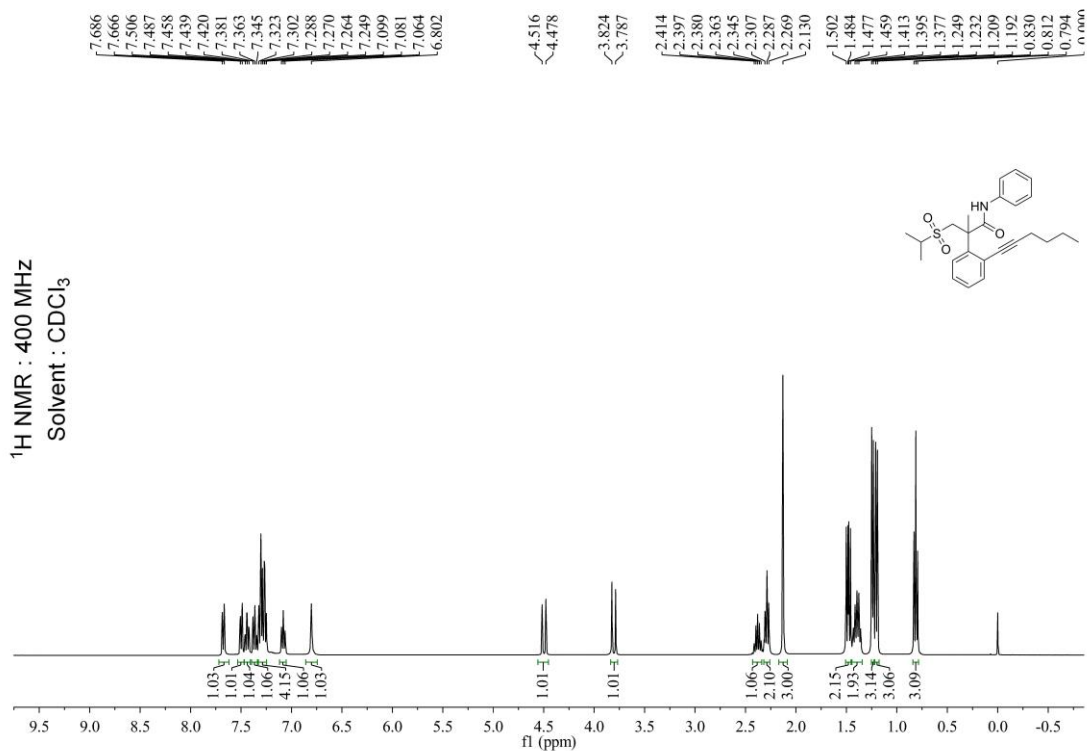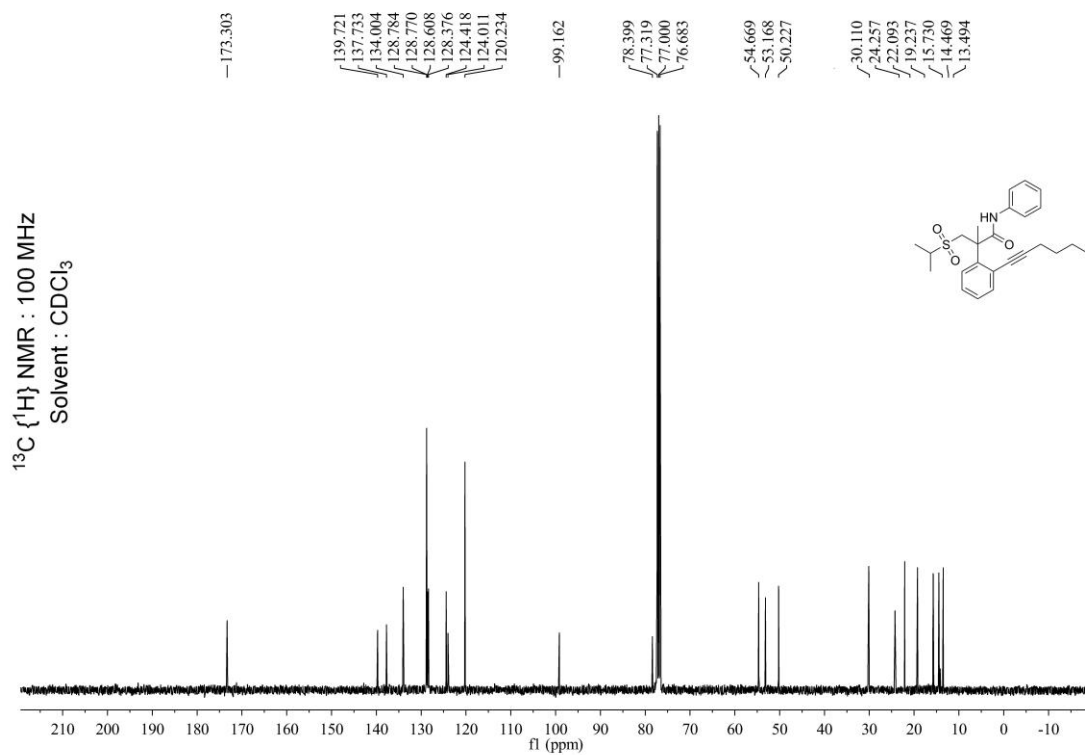

**2-((4-methoxyphenyl)ethynyl)-N-(2-methylallyl)-N-phenylbenzenesulfonamide (1z)**

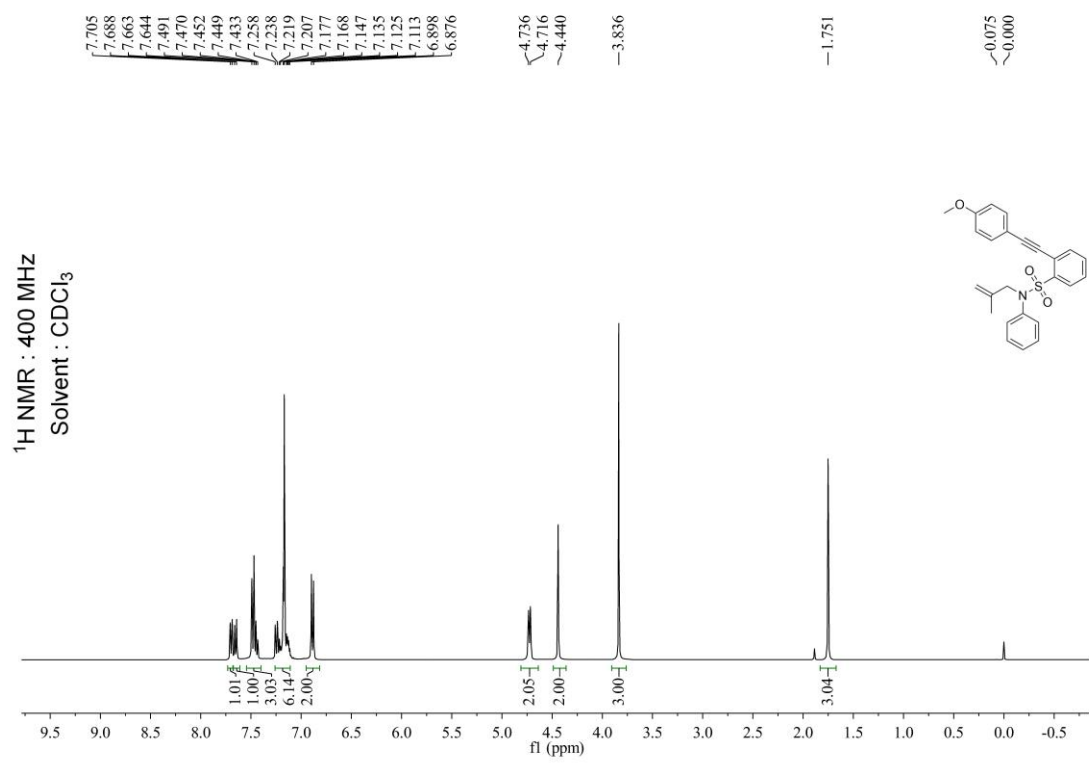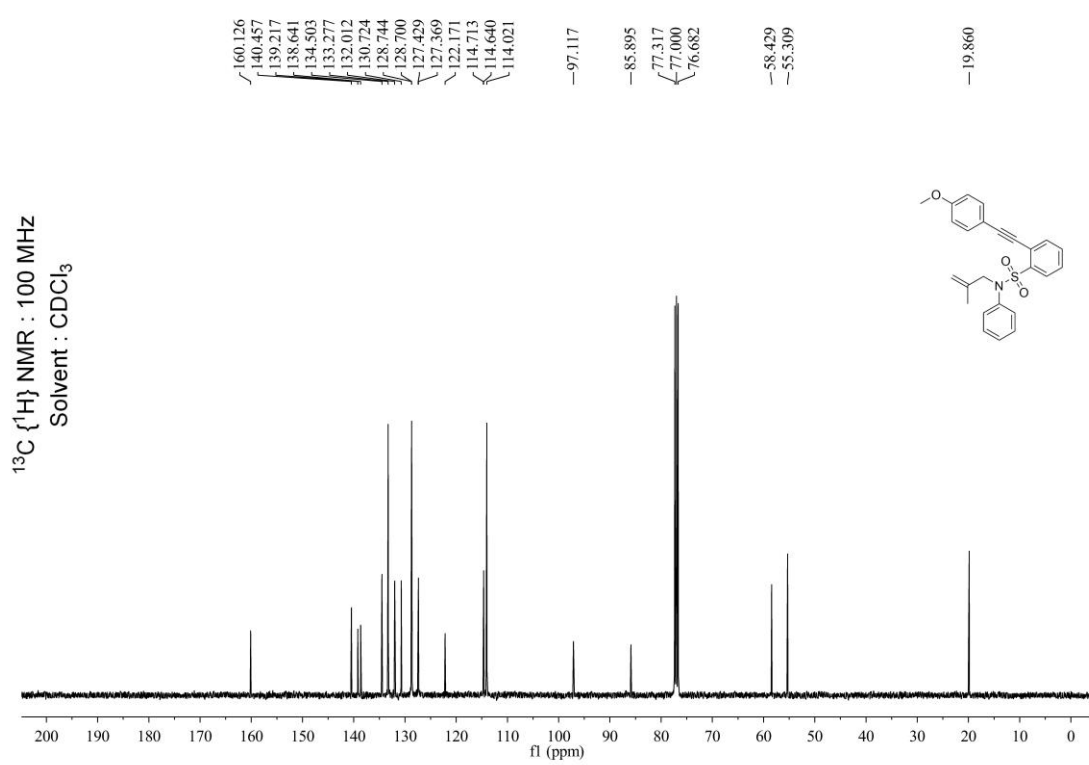

**5-isobutyl-12-(4-methoxyphenyl)-5-methylindolo[2,1-a]isoquinolin-6(5H)-ones (6aa)**

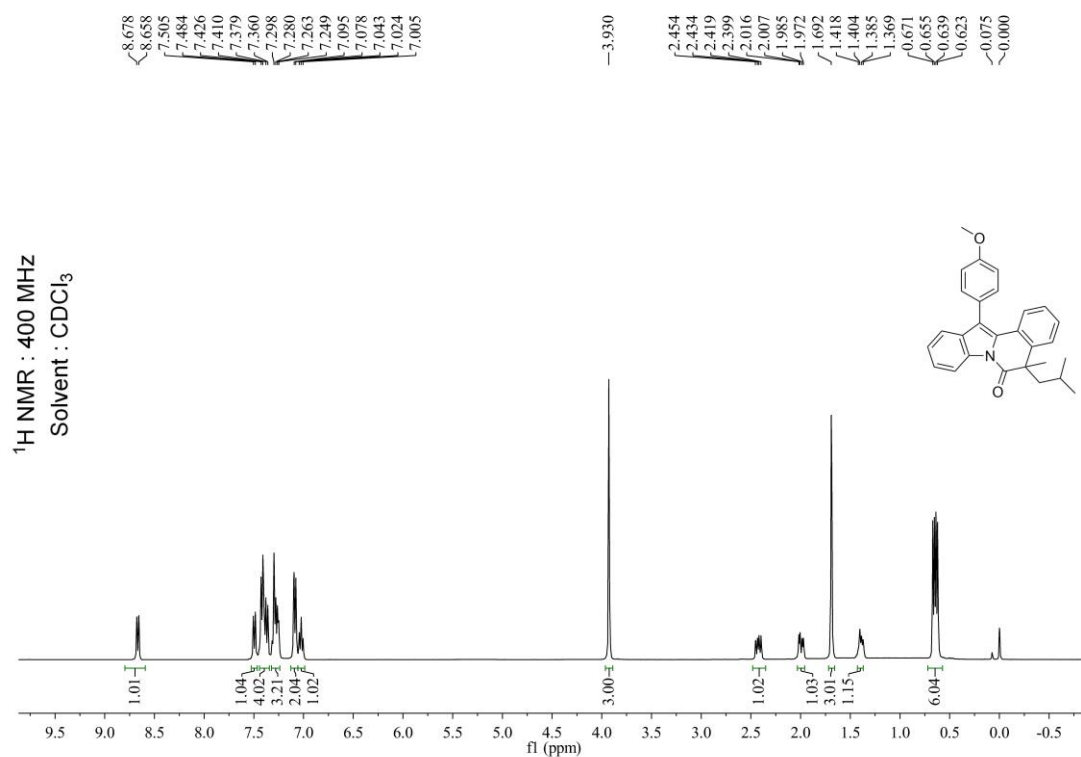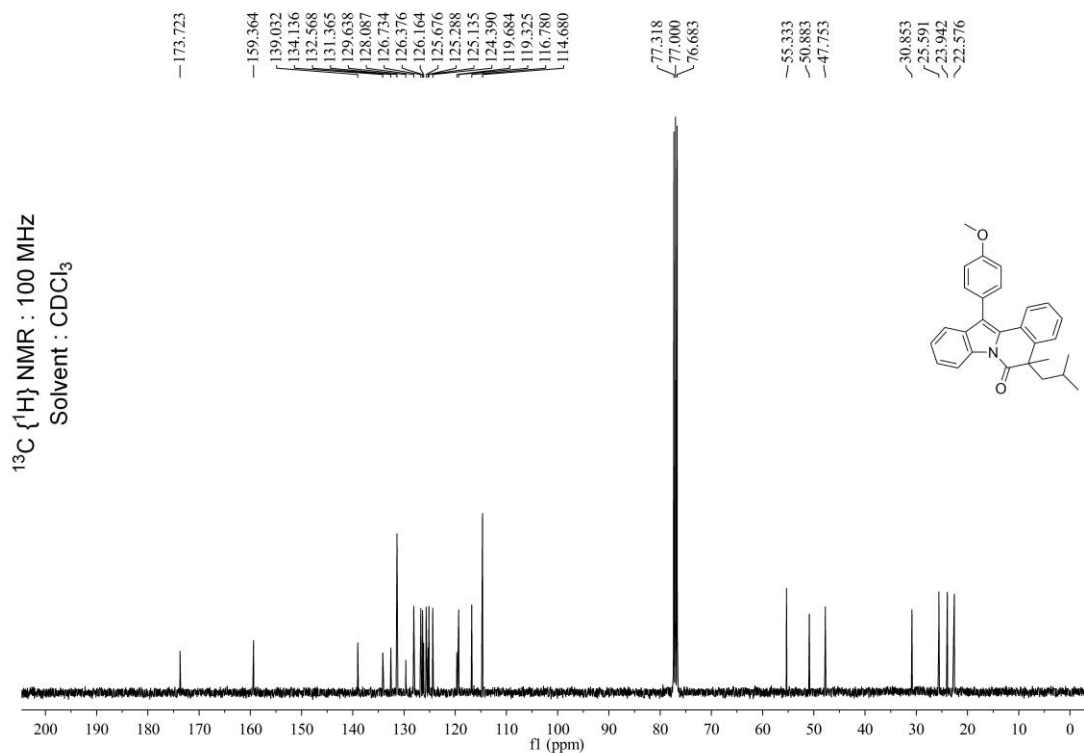

Supplement: d4cc03924f1.pdf [file d4cc03924f1.pdf]
